# Supplementary material for: Cohort profile: Biomarkers related to folate-dependent one-carbon metabolism in colorectal cancer recurrence and survival – the FOCUS Consortium
Source: PubMed Central journal article supplement (PMC9772678; doi:10.1136/bmjopen-2022-062930), 2022-12-21

# BMJ Open

BMJ Open is committed to open peer review. As part of this commitment we make the peer review history of every article we publish publicly available.

When an article is published we post the peer reviewers' comments and the authors' responses online. We also post the versions of the paper that were used during peer review. These are the versions that the peer review comments apply to.

The versions of the paper that follow are the versions that were submitted during the peer review process. They are not the versions of record or the final published versions. They should not be cited or distributed as the published version of this manuscript.

BMJ Open is an open access journal and the full, final, typeset and author-corrected version of record of the manuscript is available on our site with no access controls, subscription charges or pay-per-view fees (<http://bmjopen.bmj.com>).

If you have any questions on BMJ Open's open peer review process please email [info.bmjopen@bmj.com](mailto:info.bmjopen@bmj.com)

# BMJ Open

**Cohort profile: Biomarkers related to folate-dependent one-carbon metabolism in colorectal cancer recurrence and survival:  
The FOCUS Consortium**

|                               |                                                                                                                                                                                                                                                                                                                                                                                                                                                                                                                                                                                                                                                                                                                                                                                                                                                                                                                                                                                                                                                                                                                                                                                                                                                                                                                                                                                                                                                                                                                                                                                                                                                                                                                                                                                                                                                                                                                                                                                                                                                                                                                                                                 |
|-------------------------------|-----------------------------------------------------------------------------------------------------------------------------------------------------------------------------------------------------------------------------------------------------------------------------------------------------------------------------------------------------------------------------------------------------------------------------------------------------------------------------------------------------------------------------------------------------------------------------------------------------------------------------------------------------------------------------------------------------------------------------------------------------------------------------------------------------------------------------------------------------------------------------------------------------------------------------------------------------------------------------------------------------------------------------------------------------------------------------------------------------------------------------------------------------------------------------------------------------------------------------------------------------------------------------------------------------------------------------------------------------------------------------------------------------------------------------------------------------------------------------------------------------------------------------------------------------------------------------------------------------------------------------------------------------------------------------------------------------------------------------------------------------------------------------------------------------------------------------------------------------------------------------------------------------------------------------------------------------------------------------------------------------------------------------------------------------------------------------------------------------------------------------------------------------------------|
| Journal:                      | <i>BMJ Open</i>                                                                                                                                                                                                                                                                                                                                                                                                                                                                                                                                                                                                                                                                                                                                                                                                                                                                                                                                                                                                                                                                                                                                                                                                                                                                                                                                                                                                                                                                                                                                                                                                                                                                                                                                                                                                                                                                                                                                                                                                                                                                                                                                                 |
| Manuscript ID                 | bmjopen-2022-062930                                                                                                                                                                                                                                                                                                                                                                                                                                                                                                                                                                                                                                                                                                                                                                                                                                                                                                                                                                                                                                                                                                                                                                                                                                                                                                                                                                                                                                                                                                                                                                                                                                                                                                                                                                                                                                                                                                                                                                                                                                                                                                                                             |
| Article Type:                 | Cohort profile                                                                                                                                                                                                                                                                                                                                                                                                                                                                                                                                                                                                                                                                                                                                                                                                                                                                                                                                                                                                                                                                                                                                                                                                                                                                                                                                                                                                                                                                                                                                                                                                                                                                                                                                                                                                                                                                                                                                                                                                                                                                                                                                                  |
| Date Submitted by the Author: | 15-Mar-2022                                                                                                                                                                                                                                                                                                                                                                                                                                                                                                                                                                                                                                                                                                                                                                                                                                                                                                                                                                                                                                                                                                                                                                                                                                                                                                                                                                                                                                                                                                                                                                                                                                                                                                                                                                                                                                                                                                                                                                                                                                                                                                                                                     |
| Complete List of Authors:     | <p>Gigic, Biljana; University Hospital Heidelberg, Department of General, Visceral and Transplantation Surgery<br/> van Roekel, Eline ; Maastricht University, Department of Epidemiology<br/> Holowatyj, Andreana; Vanderbilt University Medical Center, Medicine;<br/> Vanderbilt-Ingram Cancer Center,<br/> Brezina, Stefanie; Medical University of Vienna, Institute of Cancer Research, Department of Medicine I<br/> Geijsen, Anne; Wageningen University &amp; Research, Division of Human Nutrition and Health<br/> Ulvik, Arve; BEVITAL<br/> Ose, Jennifer; Huntsman Cancer Institute; University of Utah, Department of Population Health Sciences<br/> Koole, Janna L.; Maastricht University, Department of Epidemiology<br/> Damerell, Victoria; University Hospital Heidelberg, Department of General, Visceral and Transplantation Surgery<br/> Kiblawi, Rama; Huntsman Cancer Institute; University of Utah, Department of Population Health Sciences<br/> Gumpenberger, Tanja; Medical University of Vienna, Institute of Cancer Research, Department of Medicine I<br/> Lin, Tengda; Huntsman Cancer Institute; University of Utah, Department of Population Health Sciences<br/> Kvalheim, Gry; BEVITAL<br/> Koelsch, Torsten; Heidelberg University Hospital, Department of General, Visceral and Transplantation Surgery<br/> Kok, Dieuwertje; Wageningen University &amp; Research, Division of Human Nutrition and Health<br/> van Duijnhoven, Franzel J; Wageningen University &amp; Research, Division of Human Nutrition and Health<br/> Bours, Martijn J.; Maastricht University, Department of Epidemiology<br/> Baierl, Andreas; University of Vienna, Department of Statistics and Operations Research<br/> Li, Christopher I.; Fred Hutchinson Cancer Research Center<br/> Grady, William; Fred Hutchinson Cancer Research Center; University of Washington School of Medicine, Department of Medicine<br/> Vickers, Kathy; Fred Hutchinson Cancer Research Center<br/> Habermann, Nina; European Molecular Biology Laboratory (EMBL), Genome Biology<br/> Schneider, Martin; Heidelberg University Hospital, Department of</p> |

1  
2  
3  
4  
5  
6  
7  
8  
9  
10  
11  
12  
13  
14  
15  
16  
17  
18  
19  
20  
21  
22  
23  
24  
25  
26  
27  
28  
29  
30  
31  
32  
33  
34  
35  
36  
37  
38  
39  
40  
41  
42  
43  
44  
45  
46  
47  
48  
49  
50  
51  
52  
53  
54  
55  
56  
57  
58  
59  
60

|                  |                                                                                                                                                                                                                                                                                                                                                                                                                                                                                                                                                                                                                                                                                                                                                         |
|------------------|---------------------------------------------------------------------------------------------------------------------------------------------------------------------------------------------------------------------------------------------------------------------------------------------------------------------------------------------------------------------------------------------------------------------------------------------------------------------------------------------------------------------------------------------------------------------------------------------------------------------------------------------------------------------------------------------------------------------------------------------------------|
|                  | <p>General, Visceral and Transplantation Surgery<br/>         Kampman, Ellen; Wageningen University &amp; Research, Division of Human Nutrition and Health<br/>         Ueland, Per Magne; BEVITAL<br/>         Ulrich, Alexis; Städtische Kliniken Neuss, Lukaskrankenhaus GmbH, Surgical Department I; University Hospital Heidelberg, Department of General, Visceral and Transplantation Surgery<br/>         Weijenberg, Matty ; Maastricht University, Department of Epidemiology<br/>         Gsur, Andrea; Medical University of Vienna, Institute of Cancer Research, Department of Medicine I<br/>         Ulrich, Cornelia; Huntsman Cancer Institute, Population Sciences; University of Utah, Department of Population Health Sciences</p> |
| <p>Keywords:</p> | <p>Epidemiology &lt; ONCOLOGY, Nutritional support &lt; ONCOLOGY, Gastrointestinal tumours &lt; ONCOLOGY</p>                                                                                                                                                                                                                                                                                                                                                                                                                                                                                                                                                                                                                                            |
|                  |                                                                                                                                                                                                                                                                                                                                                                                                                                                                                                                                                                                                                                                                                                                                                         |

SCHOLARONE™  
Manuscripts

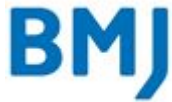

I, the Submitting Author has the right to grant and does grant on behalf of all authors of the Work (as defined in the below author licence), an exclusive licence and/or a non-exclusive licence for contributions from authors who are: i) UK Crown employees; ii) where BMJ has agreed a CC-BY licence shall apply, and/or iii) in accordance with the terms applicable for US Federal Government officers or employees acting as part of their official duties; on a worldwide, perpetual, irrevocable, royalty-free basis to BMJ Publishing Group Ltd ("BMJ") its licensees and where the relevant Journal is co-owned by BMJ to the co-owners of the Journal, to publish the Work in this journal and any other BMJ products and to exploit all rights, as set out in our [licence](#).

The Submitting Author accepts and understands that any supply made under these terms is made by BMJ to the Submitting Author unless you are acting as an employee on behalf of your employer or a postgraduate student of an affiliated institution which is paying any applicable article publishing charge ("APC") for Open Access articles. Where the Submitting Author wishes to make the Work available on an Open Access basis (and intends to pay the relevant APC), the terms of reuse of such Open Access shall be governed by a Creative Commons licence – details of these licences and which [Creative Commons](#) licence will apply to this Work are set out in our licence referred to above.

Other than as permitted in any relevant BMJ Author's Self Archiving Policies, I confirm this Work has not been accepted for publication elsewhere, is not being considered for publication elsewhere and does not duplicate material already published. I confirm all authors consent to publication of this Work and authorise the granting of this licence.

1  
2  
3  
4  
5  
6  
7  
8  
9  
10  
11  
12  
13  
14  
15  
16  
17  
18  
19  
20  
21  
22  
23  
24  
25  
26  
27  
28  
29  
30  
31  
32  
33  
34  
35  
36  
37  
38  
39  
40  
41  
42  
43  
44  
45  
46  
47  
48  
49  
50  
51  
52  
53  
54  
55  
56  
57  
58  
59  
60

## Cohort profile: Biomarkers related to folate-dependent one-carbon metabolism in colorectal cancer recurrence and survival: The FOCUS Consortium

### Authors:

Biljana Gigic<sup>1</sup>, Eline H. van Roekel<sup>2</sup>, Andreana N. Holowatyj<sup>3,4,5,6</sup>, Stefanie Brezina<sup>7</sup>, Anne J.M.R. Geijsen<sup>8</sup>, Arve Ulvik<sup>9</sup>, Jennifer Ose<sup>3,4</sup>, Janna L. Koole<sup>2</sup>, Victoria Damerell<sup>1</sup>, Rama Kiblawi<sup>3,4</sup>, Tanja Gumpenberger<sup>7</sup>, Tengda Lin<sup>3,4</sup>, Gry Kvalheim<sup>9</sup>, Torsten Koelsch<sup>1</sup>, Dieuwertje E. Kok<sup>8</sup>, Fränzel J.B. van Duijnhoven<sup>8</sup>, Martijn J. L. Bours<sup>2</sup>, Andreas Baierl<sup>10</sup>, Christopher I. Li<sup>11</sup>, William M. Grady<sup>11,12,13</sup>, Kathy Vickers<sup>11</sup>, Nina Habermann<sup>14</sup>, Martin Schneider<sup>1</sup>, Ellen Kampman<sup>8,16</sup>, Per-Magne Ueland<sup>9,16</sup>, Alexis B. Ulrich<sup>1,15,16</sup>, Matty Weijenberg<sup>2,16</sup>, Andrea Gsur<sup>7,16,17</sup> and Cornelia M. Ulrich<sup>3,4,16,17</sup>

### Affiliations:

<sup>1</sup> Department of General, Visceral and Transplantation Surgery, Heidelberg University Hospital, Heidelberg, Germany

<sup>2</sup> Department of Epidemiology, Maastricht University, Maastricht, the Netherlands

<sup>3</sup> Huntsman Cancer Institute, Salt Lake City, UT

<sup>4</sup> Department of Population Health Sciences, University of Utah, Salt Lake City, UT

<sup>5</sup> Department of Medicine, Vanderbilt University Medical Center, Nashville, TN

<sup>6</sup> Vanderbilt-Ingram Cancer Center, Nashville, TN

<sup>7</sup> Institute of Cancer Research, Department of Medicine I, Medical University of Vienna, Austria

<sup>8</sup> Division of Human Nutrition and Health, Wageningen University & Research, Wageningen, The Netherlands

<sup>9</sup> BEVITAL, Bergen, Norway

<sup>10</sup> Department of Statistics and Operations Research, University of Vienna, Austria

<sup>11</sup> Public Health Sciences Division, Fred Hutchinson Cancer Research Center, Seattle, Washington

<sup>12</sup> Department of Medicine, University of Washington School of Medicine, Seattle, Washington

<sup>13</sup> Clinical Research Division, Fred Hutchinson Cancer Research Center, Seattle, Washington

<sup>14</sup> Genome Biology, European Molecular Biology Laboratory (EMBL), Heidelberg, Germany

<sup>15</sup> Department of Surgery I, Lukas Hospital Neuss, Neuss, Germany

<sup>16</sup> These authors contributed equally

<sup>17</sup> Corresponding authors

**Word Count:** 5,995 (including profile in a nutshell)

**Tables:** 3

**Figures:** 1

**Keywords:** cohort, consortium, B-vitamins, folate, folic acid, one-carbon metabolism, dietary supplements, biomarkers, treatment toxicity, colorectal cancer, recurrence, survival

## 44 Abstract

45 **Purpose:** The overarching goal of the FOCUS (Biomarkers related to folate-dependent one-  
46 carbon metabolism in colorectal cancer recurrence and survival) Consortium is to unravel the  
47 effect of folate and folate-mediated one-carbon metabolism (FOCM) biomarkers on colorectal  
48 cancer (CRC) prognosis to provide clinically relevant advice on folate intake to cancer  
49 patients and define future tertiary prevention strategies.

50 **Participants:** The FOCUS Consortium is an international, prospective cohort of 2,401  
51 women and men above 18 years of age who were diagnosed with a primary invasive non-  
52 metastatic (stage I-III) CRC. The Consortium comprises patients from Austria, two sites from  
53 the Netherlands, Germany and two sites from the USA. Patients are recruited after CRC  
54 diagnosis and followed at six and twelve months after enrolment. At each time point,  
55 sociodemographic data, data on health behavior, and clinical data are collected, blood samples  
56 are drawn.

57 **Findings to date:** An increased risk of cancer recurrences was observed among patients with  
58 higher compared to lower circulating folic acid concentrations. Furthermore, specific folate  
59 species within the FOCM pathway were associated with both inflammation and angiogenesis  
60 pathways among CRC patients. In addition, higher vitamin B<sub>6</sub> status was associated with  
61 better quality of life at six months post treatment.

62 **Future plans:** Better insights into the research on associations between folate and FOCM  
63 biomarkers and clinical outcomes in CRC patients will facilitate the development of  
64 guidelines regarding folate intake in order to provide clinically relevant advice to cancer  
65 patients, health professionals involved in patient care, and ultimately further tertiary  
66 prevention strategies in the future.

## 67 Strengths and limitations of this study

- 68 • FOCUS is the largest consortium to date addressing the research question of folate and  
69 FOCM biomarkers in relation to survival, recurrence, treatment toxicity, and health-  
70 related quality of life outcomes in CRC patients
- 71 • The cohorts included in the FOCUS Consortium are designed to enable future pooling  
72 of data using harmonized and standardized methods to collect data and biospecimens
- 73 • The pooled sample size provides sufficient power to investigate subgroup analyses  
74 across CRC patients
- 75 • Study time point definitions differ between some of the cohorts and have to be adapted  
76 for specific projects
- 77 • A selection bias for follow-up can arise because it is possible that patients who  
78 experience more severe toxicities, worse clinical outcome or health-related quality of  
79 life are underrepresented among those completing follow-ups

## 81 **Why was the FOCUS Consortium set up?**

82 Among men and women world-wide, colorectal cancer (CRC) accounts for nearly 10% of all  
83 incident cancer cases.<sup>1</sup> In Europe, 5-year survival for CRC patients is approximately 55%,  
84 with substantial differences by stage.<sup>2,3</sup> The number of CRC patients continues to increase due  
85 to implementation of improved screening strategies and/or enhanced treatment modalities.<sup>4</sup>  
86 Many cancer patients seek information on what they can do themselves to improve survival -  
87 for instance by improving their dietary habits and other lifestyle factors.<sup>5</sup> However, there may  
88 be behavioural aspects among individuals diagnosed with CRC, which may be harmful in  
89 some cases, such as the use of high-dose nutritional supplements containing synthetic folate.  
90 In general, knowledge on short and long-term effects is insufficient to make sound  
91 recommendations on use of dietary supplements, in particular folate, to cancer survivors, even  
92 though dietary supplements are used by 20%-85% of patients with cancer<sup>6-8</sup>, highlighting the  
93 importance of thorough evaluation of potential benefits and harms and to support  
94 development of evidence-based recommendations on use of dietary supplements to cancer  
95 patients.

96 Folic acid is the synthetic form of the B-vitamin folate and is often used in dietary  
97 supplements or fortified foods. Folate and folic acid play an important role in one-carbon  
98 metabolism, which is a complex series of biochemical reactions essential in nucleotide  
99 synthesis, methylation reactions and amino acid homeostasis (REF PMID: 27641100). One-  
100 carbon metabolism refers to a complex network of biochemical reactions linked to nucleotide  
101 synthesis and provides methyl groups for DNA, RNA or protein methylation. Thus, one-  
102 carbon metabolism is directly controlling processes determining DNA synthesis and integrity,  
103 both processes known to be linked to tumor growth.<sup>9</sup> To what extent folic acid supplement  
104 use and biomarkers of folate-mediated one-carbon metabolism (FOCM) impact cancer  
105 survival and treatment efficacy and toxicity still needs to be clarified.<sup>9 10</sup> Folate and FOCM  
106 biomarker deficiencies may increase cancer risk, but high levels, especially of synthetic folic  
107 acid, may also be driving factors in carcinogenesis.<sup>6 11</sup> An increasing body of evidence  
108 suggests that folate plays a dual role in carcinogenesis, involving both the prevention of early  
109 lesions and potential harm once pre-neoplastic or neoplastic lesions have developed.<sup>6 10 12-18</sup>

110 The overarching goal of the FOCUS (biomarkers related to Folate-dependent one-  
111 carbon metabolism in Colorectal cancer recUrrance and Survival) Consortium is to study  
112 associations between folate and FOCM biomarkers and recurrence and survival in CRC  
113 patients. Better insights into these associations will facilitate the development of guidelines

1  
2  
3 114 regarding folate intake in order to provide clinically relevant advice to cancer patients, health  
4  
5 115 professionals involved in patient care, and ultimately further tertiary prevention strategies in  
6  
7 116 the future. The FOCUS Consortium is a large-scale international consortium with CRC  
8  
9 117 patients from six prospective cohort studies. The primary objectives of the FOCUS  
10  
11 118 Consortium are: (i) to determine possible associations of folate and other FOCM biomarkers  
12  
13 119 at diagnosis with recurrence or survival in non-metastatic (stage I-III) CRC; (ii) to elucidate  
14  
15 120 whether biomarkers related to FOCM are associated with dietary and supplemental intake of  
16  
17 121 these respective nutrients; (iii) to explore whether FOCM biomarkers are associated with  
18  
19 122 treatment toxicity in CRC patients undergoing chemotherapy; and (iv) to collect  
20  
21 123 comprehensive data of patient characteristics at baseline and follow-up including biomarkers  
22  
23 124 of FOCM to establish a unique resource for future scientific research. The FOCUS  
24  
25 125 Consortium is funded by the European Research Area Network (ERA-NET) on Translational  
26  
27 126 Cancer Research (TRANSCAN).

28  
29 127 This joint research may lead to a better understanding of the role of folate- and  
30  
31 128 FOCM-related mechanisms in the prognosis of CRC, which will be critical for the  
32  
33 129 development of guidelines regarding folate intake among CRC patients.

### 34 130 **Who is in the FOCUS Consortium?**

35  
36 131 The FOCUS Consortium is an international, prospective consortium including six cohort  
37  
38 132 studies recruiting women and men age 18 years and older diagnosed with a primary CRC. The  
39  
40 133 FOCUS Consortium is comprised of patients from the ColoCare Study at the University of  
41  
42 134 Heidelberg, Germany (n=298, 12.3%), the ColoCare Study at the Huntsman Cancer Institute  
43  
44 135 in Salt Lake City, Utah, USA (n=80, 3.3%), the ColoCare Study at the Fred Hutchinson  
45  
46 136 Cancer Research Center in Seattle, Washington, USA (n=157, 6.3%), the COLON Study  
47  
48 137 (Colorectal cancer: Longitudinal, Observational study on Nutritional and lifestyle factors that  
49  
50 138 may influence colorectal tumor recurrence, survival and quality of life) at Wageningen  
51  
52 139 University & Research in the Netherlands (n=1,365, 56.1%), the CORSA Study (Colorectal  
53  
54 140 Cancer Study of Austria) at the Medical University of Vienna in Austria (n=218, 9.0%), and  
55  
56 141 the EnCoRe Study (Energy for life after ColoRectal cancer) at Maastricht University Medical  
57  
58 142 Center+ in the Netherlands (n=317, 13.0%).

59  
60 143 In total, n=2,435 CRC patients were considered for the FOCUS Consortium, of which  
144  
145 n=34 patients were excluded due to tumor staging being either 0 or IV leading to a total  
number of n=2,401 stage I-III CRC patients included in further analyses.



1  
2  
3 146 Patients were recruited after CRC diagnosis and repeated study measurements were  
4  
5 147 conducted at time of recruitment, and at six and twelve months thereafter. At each study time  
6  
7 148 point, sociodemographic data, data on lifestyle factors (e.g., diet, supplement use, physical  
8  
9 149 activity), and clinical data (e.g., tumor site and stage, cancer treatment, treatment-induced  
10  
11 150 toxicities, recurrence, survival) were collected, and blood samples were drawn (**Figure 1**). All  
12  
13 151 individuals signed informed consent and the Institutional Review Board at each site approved  
14  
15 152 the corresponding study. Below, a more specific description of each included study is  
16  
17 153 provided.

### 18 154 The ColoCare Study

19  
20 155 The ColoCare Study (ClinicalTrials.gov identifier: NCT02328677) is an ongoing  
21  
22 156 international, multi-center prospective cohort study among women and men newly diagnosed  
23  
24 157 with a primary invasive CRC, with the goal to investigate predictors of cancer recurrence,  
25  
26 158 survival, treatment toxicities and health-related quality of life.<sup>4 19</sup> Three ColoCare Consortium  
27  
28 159 sites participate in the FOCUS Consortium: the Fred Hutchinson Cancer Research Center in  
29  
30 160 Seattle (Washington, USA), and the University Hospital Heidelberg, Heidelberg (Germany)  
31  
32 161 as well as the Huntsman Cancer Institute in Salt Lake City (Utah, USA). Patients are enrolled  
33  
34 162 prior to undergoing CRC surgery according to the following inclusion criteria: individuals  
35  
36 163 who are 18 years of age and older, newly diagnosed (i.e., non-recurrent) with invasive CRC.  
37  
38 164 Blood draws and other biospecimens are obtained prior to surgery and at regular intervals  
39  
40 165 (e.g., six, twelve, twenty-four months). Questionnaires are administered to assess lifestyle  
41  
42 166 behavior, health-related quality of life, and clinical outcomes such as CRC recurrence,  
43  
44 167 treatment, and treatment symptoms at each study time point. Clinical data are obtained  
45  
46 168 through reviews of patient medical records, pathology and imaging reports. Vital status is  
47  
48 169 obtained through medical records, routine follow-up mailings, periodic requests for outside  
49  
50 170 medical records, and state or national cancer and death registries. The Heidelberg ColoCare  
51  
52 171 Study was approved by the Ethics Committee of the Medical Faculty of Heidelberg (approval  
53  
54 172 no. S-310/2001 and S-134/2016). The ColoCare Study at the Huntsman Cancer Institute and  
55  
56 173 the Fred Hutchinson Cancer Research Center were approved by the respective IRBs (#77147  
57  
58 174 and #6407).

### 55 175 The COLON Study

56  
57  
58 176 The COLON Study (ClinicalTrials.gov identifier: NCT03191110) started in 2010 and is an  
59  
60 177 ongoing, multicenter prospective cohort study specifically designed to assess associations

1  
2  
3 178 between nutrition, lifestyle, and dietary supplement use with quality of life, CRC recurrence  
4  
5 179 and survival among CRC patients (stages I-IV).<sup>20</sup> Persons with a history of CRC or (partial)  
6  
7 180 bowel resection, chronic inflammatory bowel disease, or a known hereditary CRC syndrome  
8  
9 181 are excluded from the study. Patients are recruited from eleven regional and academic  
10  
11 182 hospitals prior to surgery. Individuals donate blood samples and provide information on diet,  
12  
13 183 lifestyle, and dietary supplement use at CRC diagnosis, i.e. baseline, and at six, twelve  
14  
15 184 (chemotherapy patients only), twenty-four and sixty months after diagnosis. Clinical data are  
16  
17 185 collected through review of medical records (treatment-induced toxicity) or through linkage  
18  
19 186 with the Dutch ColoRectal Audit (DCRA). Mortality data (i.e. death or alive and date of  
20  
21 187 death) are retrieved from the Municipal Personal Records Database. Recurrence data have  
22  
23 188 been retrieved in collaboration with the Netherlands Cancer Registry. Ethical approval for the  
24  
25 189 study was granted by the Committee on Research involving Human Subjects, region Arnhem-  
26  
27 190 Nijmegen under file number 2009/349.

### 26 191 The CORSA Study

28  
29 192 CORSA is an ongoing case-control study of women and men recruiting CRC patients,  
30  
31 193 patients with high and low risk adenomas and population-based colonoscopy negative  
32  
33 194 controls, with an age range between 30 and 90 years. Since 2003, more than 13,500  
34  
35 195 participants have been recruited across nine sites in Austria. The multicentre recruitment  
36  
37 196 within CORSA follows standardized protocols resulting in consistent data from all  
38  
39 197 recruitment sites. These sites include the Medical University of Vienna (Department of  
40  
41 198 Surgery), two hospitals in Vienna (Clinic Favoriten and Clinic Landstraße), and the Hospital  
42  
43 199 Wiener Neustadt in Lower Austria. Furthermore, the recruitment for CORSA was performed  
44  
45 200 in four hospitals in the federal state Burgenland within the population-based screening  
46  
47 201 program "Burgenland PREvention Trial of colorectal cancer Disease with ImmunologiCal  
48  
49 202 Testing" (B-PREDICT). B-PREDICT is a two-stage screening project where more than  
50  
51 203 150,000 inhabitants of Burgenland aged between 40 and 80 are invited annually to participate  
52  
53 204 in this program using a Fecal Immunochemical Test (FIT) as an initial screening. FIT-positive  
54  
55 205 ( $\geq 10$   $\mu\text{g}$  hemoglobin / g feces) tested individuals are offered a complete colonoscopy and are  
56  
57 206 asked to participate in CORSA. Biospecimen are collected at each site using harmonized  
58  
59 207 protocols. CORSA participants provide a basic CORSA questionnaire assessing data on body  
60  
208 mass index (BMI), smoking history, alcohol consumption, education level, family status,  
209 profession, basic dietary habits, and diabetes. Clinical data are abstracted from medical  
210 records and processed in a structured database following standardized documentation

1  
2  
3 211 guidelines and according to the General Data Protection Regulation (GDPR). All subjects  
4  
5 212 gave written informed consent and the study was approved by the institutional review boards:  
6  
7 213 'Ethikkommission Burgenland' (33/2010), by the ethical review committee of the Medical  
8  
9 214 University of Vienna (1160/2016) and by the "Ethikkommission der Stadt Wien" (EK 06-  
10  
11 215 150VK).

### 12 13 216 The EnCoRe Study

14  
15 217 The EnCoRe Study is a prospective cohort study initiated in 2012 at the Maastricht University  
16  
17 218 Medical Center+ in the Netherlands that focuses on the importance of lifestyle factors for  
18  
19 219 quality of life, recurrence and survival of CRC patients.<sup>21</sup> The EnCoRe Study is registered in  
20  
21 220 the Netherlands Trial Registry for experimental and observational studies  
22  
23 221 ([www.trialregister.nl](http://www.trialregister.nl), registration number 7099). Stage I-III CRC patients are enrolled at  
24  
25 222 diagnosis at three hospitals in the South-Eastern region of the Netherlands and followed up  
26  
27 223 until five years after completion of treatment with repeated measurements at diagnosis (pre-  
28  
29 224 treatment), and at six weeks and six, twelve, twenty-four, and sixty months after the end of  
30  
31 225 the initial anti-cancer treatment (i.e., surgery, chemotherapy, radiotherapy). Patients with  
32  
33 226 stage IV CRC, an inability to understand the Dutch language in speech or writing, with  
34  
35 227 comorbidities obstructing successful participation (e.g., Alzheimer disease), or with severe  
36  
37 228 visibility or hearing disorders are excluded from the study. Repeated home visits by trained  
38  
39 229 dieticians are conducted and data are collected amongst others on sociodemographic factors,  
40  
41 230 quality of life, functioning, physical activity, comorbidity, dietary intake, supplement use, and  
42  
43 231 anthropometry. In addition, clinical data are collected from hospital records and blood  
44  
45 232 samples are drawn at all time points. Recurrence data have been retrieved in collaboration  
46  
47 233 with the Netherlands Cancer Registry. Mortality data (i.e. death or alive and date of death) are  
48  
49 234 retrieved from the Municipal Personal Records Database. The EnCoRe Study was approved  
50  
51 235 by the Medical Ethics Committee of the Maastricht University Hospital and Maastricht  
52  
53 236 University (METC 11-3-075).

### 54 55 237 The FOCUS Consortium

56  
57 238 Sociodemographic, clinical and lifestyle characteristics of the 2,401 participants in the  
58  
59 239 FOCUS Consortium are presented in **Table 1**. The mean age at CRC diagnosis was 65.4 years  
60  
240 (standard deviation (SD): 10.2; range: 22 to 93 years), and the majority of participants were  
241  
male (64.0%). The mean BMI was 27.0 kg/m<sup>2</sup> (SD: 4.6).

**Table 1: Sociodemographic, clinical, and lifestyle factors of eligible FOCUS Consortium participants at baseline (n=2,401)**

|                                   | Overall        | ColoCare HD        | ColoCare FHCRC        | ColoCare HCI        | COLON        | CORSA        | EnCoRe        |
|-----------------------------------|----------------|--------------------|-----------------------|---------------------|--------------|--------------|---------------|
| n (%)                             | 2,401 (100)    | 298 (12.4)         | 150 (6.3)             | 80 (3.3)            | 1,338 (55.7) | 218 (9.1)    | 317 (13.2)    |
| <b>Age</b>                        |                |                    |                       |                     |              |              |               |
| <b>Mean y ± SD</b>                | 65.4 ± 10.2    | 63.7 ± 12.2        | 58.3 ± 12.8           | 61.3 ± 11.2         | 66.1 ± 8.7   | 67.3 ± 12.0  | 66.9 ± 9.3    |
| <b>Sex</b>                        |                |                    |                       |                     |              |              |               |
| <b>Female n (%)</b>               | 864 (36.0)     | 100 (33.6)         | 67 (44.7)             | 32 (40.0)           | 486 (36.3)   | 76 (34.9)    | 103 (32.5)    |
| <b>Male n (%)</b>                 | 1,537 (64.0)   | 198 (66.4)         | 83 (55.3)             | 48 (60.0)           | 852 (63.7)   | 142 (65.1)   | 214 (67.5)    |
| <b>Education</b>                  |                |                    |                       |                     |              |              |               |
| <b>Low n (%)</b>                  | 861 (35.9)     | 123 (41.3)         | 18 (12.0)             | 17 (21.3)           | 543 (40.6)   | 73 (33.5)    | 87 (27.4)     |
| <b>Intermediate n (%)</b>         | 694 (28.9)     | 57 (19.1)          | 71 (47.3)             | 40 (50.0)           | 332 (24.8)   | 73 (33.5)    | 121 (38.2)    |
| <b>High n (%)</b>                 | 658 (27.4)     | 88 (29.5)          | 28 (18.7)             | 8 (10.0)            | 417 (31.7)   | 14 (6.4)     | 103 (32.5)    |
| <b>Unknown n (%)</b>              | 188 (7.8)      | 30 (10.1)          | 33 (22.0)             | 15 (18.7)           | 46 (3.4)     | 58 (26.6)    | 6 (1.9)       |
| <b>Marital status</b>             |                |                    |                       |                     |              |              |               |
| <b>Unmarried n (%)</b>            | 122 (5.1)      | 19 (6.4)           | 15 (10.0)             | 2 (2.5)             | 60 (4.5)     | 10 (4.6)     | 16 (5.1)      |
| <b>Married n (%)</b>              | 1,738 (72.4)   | 193 (64.8)         | 71 (47.3)             | 50 (62.5)           | 1,071 (80.0) | 113 (51.8)   | 240 (75.7)    |
| <b>Divorced/Separated n (%)</b>   | 138 (5.7)      | 24 (8.0)           | 11 (7.3)              | 10 (12.5)           | 64 (4.8)     | 14 (6.4)     | 15 (4.7)      |
| <b>Widowed n (%)</b>              | 194 (8.1)      | 31 (10.4)          | 7 (4.7)               | 1 (1.3)             | 90 (6.7)     | 26 (11.9)    | 39 (12.3)     |
| <b>Living community n (%)</b>     | 20 (0.8)       | 0                  | 13 (8.7)              | 2 (2.5)             | 4 (0.3)      | 1 (0.5)      | 0             |
| <b>Unknown n (%)</b>              | 189 (8.9)      | 31 (10.4)          | 33 (22.0)             | 15 (18.7)           | 49 (3.7)     | 54 (24.8)    | 7 (2.2)       |
| <b>Smoking status</b>             |                |                    |                       |                     |              |              |               |
| <b>Current n (%)</b>              | 290 (12.1)     | 53 (17.8)          | 8 (5.3)               | 6 (7.5)             | 143 (10.7)   | 38 (17.4)    | 42 (13.3)     |
| <b>Former n (%)</b>               | 1,219 (50.8)   | 132 (44.3)         | 53 (35.32)            | 21 (26.3)           | 767 (57.3)   | 76 (34.9)    | 170 (53.6)    |
| <b>Never n (%)</b>                | 767 (31.9)     | 90 (30.2)          | 56 (37.3)             | 39 (48.7)           | 386 (28.9)   | 97 (44.5)    | 99 (31.2)     |
| <b>Unknown n (%)</b>              | 125 (5.2)      | 23 (7.7)           | 33 (22.0)             | 14 (17.5)           | 42 (3.1)     | 7 (3.2)      | 6 (1.9)       |
| <b>Alcohol intake</b>             |                |                    |                       |                     |              |              |               |
| <b>Mean g/day ± SD</b>            | 13.6 ± 17.1    | 16.1 ± 19.2        | 8.8 ± 18.5            | 2.3 ± 10.2          | 14.0 ± 17.0  |              | 12.9 ± 16.5   |
| <b>Unknown n (%)</b>              | 633 (26.4)     | 208 (69.8)         | 81 (54.0)             | 60 (75.0)           | 54 (4.1)     | 218 (100)    | 12 (3.8)      |
| <b>BMI at diagnosis</b>           |                |                    |                       |                     |              |              |               |
| <b>Mean kg/m<sup>2</sup> ± SD</b> | 27.1 ± 4.6     | 26.6 ± 4.1         | 28.7 ± 7.3            | 29.4 ± 7.5          | 26.6 ± 4.0   | 27.7 ± 4.4   | 28.3 ± 4.6    |
| <b>Unknown n (%)</b>              | 42 (1.7)       | 2 (0.7)            | 0                     | 14 (17.5)           | 10 (0.8)     | 14 (6.4)     | 2 (0.6)       |
|                                   | <b>Overall</b> | <b>ColoCare HD</b> | <b>ColoCare FHCRC</b> | <b>ColoCare HCI</b> | <b>COLON</b> | <b>CORSA</b> | <b>EnCoRe</b> |

|                                               |              |             |            |           |              |            |            |  |
|-----------------------------------------------|--------------|-------------|------------|-----------|--------------|------------|------------|--|
| <b>Tumor site</b>                             |              |             |            |           |              |            |            |  |
| <b>Colon n (%)</b>                            | 1,450 (60.4) | 140 (57.0)  | 75 (50.0)  | 45 (56.3) | 867 (64.8)   | 131 (60.1) | 192 (60.6) |  |
| <b>Rectum n (%)</b>                           | 862 (35.9)   | 143 (48.0)  | 60 (40.0)  | 22 (27.5) | 434 (32.4)   | 78 (35.8)  | 125 (39.4) |  |
| <b>Rectosigmoid n (%)</b>                     | 42 (1.7)     | 15 (5.0)    | 15 (10.0)  | 7 (8.7)   | 0            | 5 (2.3)    | 0          |  |
| <b>Unknown n (%)</b>                          | 47 (2.0)     | 0           | 0          | 6 (7.5)   | 37 (2.8)     | 4 (1.8)    | 0          |  |
| <b>Tumor stage</b>                            |              |             |            |           |              |            |            |  |
| <b>I n (%)</b>                                | 629 (26.2)   | 76 (25.5)   | 35 (23.3)  | 21 (26.3) | 326 (24.4)   | 82 (37.6)  | 89 (28.1)  |  |
| <b>II n (%)</b>                               | 694 (28.9)   | 114 (38.3)  | 49 (32.7)  | 23 (28.7) | 386 (28.9)   | 52 (23.9)  | 70 (22.1)  |  |
| <b>III n (%)</b>                              | 973 (40.5)   | 108 (36.2)  | 66 (44.0)  | 36 (45.0) | 564 (42.1)   | 52 (23.9)  | 147 (46.4) |  |
| <b>Unspecified* n (%)</b>                     | 16 (0.7)     | 0           | 0          | 0         | 4 (0.3)      | 12 (5.5)   | 0          |  |
| <b>Unknown n (%)</b>                          | 89 (3.7)     | 0           | 0          | 0         | 58 (4.3)     | 20 (9.2)   | 11 (3.5)   |  |
| <b>Treatment</b>                              |              |             |            |           |              |            |            |  |
| <b>Neoadjuvant chemotherapy n (%)</b>         | 331 (13.8)   | 55 (18.5)   | 47 (31.3)  | 15 (18.8) | 138 (10.3)   | 14 (6.4)   | 62 (19.6)  |  |
| <b>Unknown n (%)</b>                          | 58 (2.4)     | 2 (0.7)     | 1 (0.7)    | 10 (12.5) | 38 (2.8)     | 7 (3.2)    | 0          |  |
| <b>Neoadjuvant radiotherapy n (%)</b>         | 523 (21.8)   | 72 (24.2)   | 48 (32.0)  | 13 (16.3) | 290 (21.7)   | 14 (6.4)   | 86 (27.1)  |  |
| <b>Unknown n (%)</b>                          | 58 (2.4)     | 2 (0.7)     | 1 (0.7)    | 10 (12.5) | 38 (2.8)     | 7 (3.2)    | 0          |  |
| <b>Adjuvant chemotherapy n (%)</b>            | 682 (28.4)   | 100 (33.6)  | 80 (53.3)  | 32 (40.0) | 315 (23.8)   | 56 (25.7)  | 99 (31.2)  |  |
| <b>Unknown n (%)</b>                          | 121 (5.0)    | 17 (5.7)    | 3 (2.0)    | 28 (35.0) | 63 (4.7)     | 9 (4.1)    | 1 (0.3)    |  |
| <b>Adjuvant radiotherapy n (%)</b>            | 227 (9.5)    | 188 (63.1)  | 7 (4.7)    | 1 (1.3)   | 16 (1.2)     | 13 (6.0)   | 2 (0.6)    |  |
| <b>Unknown n (%)</b>                          | 164 (6.8)    | 17 (5.7)    | 3 (2.0)    | 28 (35.0) | 106 (7.9)    | 9 (4.1)    | 1 (0.3)    |  |
| <b>Surgery n (%)</b>                          | 2,291 (95.4) | 298 (100.0) | 149 (99.3) | 71 (88.7) | 1,290 (96.4) | 195 (89.5) | 288 (90.9) |  |
| <b>Unknown n (%)</b>                          | 44 (1.8)     | 0           | 0          | 3 (3.8)   | 39 (2.9)     | 1 (0.5)    | 1 (0.3)    |  |
| <b>Folic acid supplementation</b>             |              |             |            |           |              |            |            |  |
| <b>Yes n (%)</b>                              | 405 (16.9)   | 4 (1.3)     | 9 (5.9)    | 2 (2.5)   | 325 (24.3)   |            | 65 (20.5)  |  |
| <b>Unknown n (%)</b>                          | 383 (15.9)   | 27 (9.1)    | 86 (56.6)  | 14 (17.5) | 38 (2.8)     | 218 (100)  | 0          |  |
| <b>Vitamin B<sub>12</sub> supplementation</b> |              |             |            |           |              |            |            |  |
| <b>Yes n (%)</b>                              | 430 (17.9)   | 10 (3.4)    | 8 (5.3)    | 14 (17.5) | 336 (25.1)   |            | 62 (19.6)  |  |
| <b>Unknown n (%)</b>                          | 384 (16.0)   | 27 (9.1)    | 86 (56.6)  | 14 (17.5) | 39 (2.9)     | 218 (100)  | 0          |  |
| <b>Vitamin B<sub>6</sub> supplementation</b>  |              |             |            |           |              |            |            |  |
| <b>Yes n (%)</b>                              | 77 (3.2)     | 8 (2.7)     | 4 (2.6)    | 4 (5.0)   |              |            | 61 (19.2)  |  |
| <b>Unknown n (%)</b>                          | 1,684 (70.1) | 27 (9.1)    | 86 (56.6)  | 14 (17.5) | 1,339 (100)  | 218 (100)  | 0          |  |

|                                                    | Overall         | ColoCare HD     | ColoCare FHCRC | ColoCare HCI    | COLON           | CORSA     | EnCoRe          |
|----------------------------------------------------|-----------------|-----------------|----------------|-----------------|-----------------|-----------|-----------------|
| <b>Vitamin B<sub>2</sub> supplementation</b>       |                 |                 |                |                 |                 |           |                 |
| <b>Yes n (%)</b>                                   | 62 (2.6)        | 0               | 2 (1.3)        | 0               |                 |           | 60 (18.9)       |
| <b>Unknown n (%)</b>                               | 1,684 (70.1)    | 27 (9.1)        | 86 (56.6)      | 14 (17.5)       | 1,339 (100)     | 218 (100) | 0               |
| <b>Dietary intake of folate equivalents</b>        |                 |                 |                |                 |                 |           |                 |
| <b>Mean µg/day ± SD</b>                            | 227.1 ± 94.3    | 115.1 ± 38.1    | 149.6 ± 97.5   | 116.2 ± 112.8   | 229.0 ± 88.7    |           | 276.3 ± 82.2    |
| <b>Unknown n (%)</b>                               | 638 (26.5)      | 208 (69.8)      | 83 (54.6)      | 60 (75.0)       | 57 (4.3)        | 218 (100) | 12 (3.8)        |
| <b>Dietary intake of vitamin B<sub>12</sub></b>    |                 |                 |                |                 |                 |           |                 |
| <b>Mean µg/day ± SD</b>                            | 4.6 ± 2.4       | 6.2 ± 2.9       | 7.1 ± 5.8      | 4.2 ± 2.2       | 4.3 ± 2.1       |           | 4.6 ± 2.0       |
| <b>Unknown n (%)</b>                               | 638 (26.5)      | 208 (69.8)      | 83 (54.6)      | 60 (75.0)       | 57 (4.3)        | 218 (100) | 12 (3.8)        |
| <b>Dietary intake of vitamin B<sub>6</sub></b>     |                 |                 |                |                 |                 |           |                 |
| <b>Mean mg/day ± SD</b>                            | 1.5 ± 0.5       | 1.7 ± 0.5       | 2.0 ± 0.7      | 1.5 ± 0.7       | 1.5 ± 0.5       |           | 1.8 ± 0.5       |
| <b>Unknown n (%)</b>                               | 638 (26.5)      | 208 (69.8)      | 83 (54.6)      | 60 (75.0)       | 57 (4.3)        | 218 (100) | 12 (3.8)        |
| <b>Dietary intake of vitamin B<sub>2</sub></b>     |                 |                 |                |                 |                 |           |                 |
| <b>Mean mg/day ± SD</b>                            | 1.4 ± 0.5       | 1.5 ± 0.5       | 2.2 ± 1.0      | 1.6 ± 0.8       | 1.3 ± 0.4       |           | 1.4 ± 0.5       |
| <b>Unknown n (%)</b>                               | 638 (26.5)      | 208 (69.8)      | 83 (54.6)      | 60 (75.0)       | 57 (4.3)        | 218 (100) | 12 (3.8)        |
| <b>Total energy intake</b>                         |                 |                 |                |                 |                 |           |                 |
| <b>Mean kcal/day ± SD</b>                          | 1,941.8 ± 593.6 | 2,330.9 ± 714.0 | 1835.0 ± 775.7 | 1,398.5 ± 597.8 | 1,856.9 ± 517.2 |           | 2,243.7 ± 651.0 |
| <b>Unknown n (%)</b>                               | 638 (26.5)      | 208 (69.8)      | 83 (54.6)      | 60 (75.0)       | 57 (4.3)        | 218 (100) | 12 (3.8)        |
| <b>Adherence to physical activity guidelines**</b> |                 |                 |                |                 |                 |           |                 |
| <b>Yes n (%)</b>                                   | 1,310 (54.5)    | 84 (28.2)       | 35 (23.0)      | 20 (25.0)       | 941 (70.3)      |           | 230 (72.6)      |
| <b>Unknown n (%)</b>                               | 370 (15.4)      | 33 (11.1)       | 53 (34.9)      | 15 (18.7)       | 45 (3.4)        | 218 (100) | 6 (1.9)         |

\*Distinguishing between stage I and II or II and III not possible

\*\*Self-reported engagement in at least 150 minutes per week of moderate-to-vigorous physical activity

1  
2  
3  
4 244 In terms of education status, 35.9% of the patients reported lower education, 28.8% reported  
5  
6 245 intermediate education and 27.3% high education. Most of the patients were married or part  
7  
8 246 of a living community (73.1%). About half of the overall cohort reported to be a former  
9  
10 247 smoker (50.8%), 31.7% were never smokers, and 12.1% were current smokers (5.4% were  
11  
12 248 unknown). Median alcohol intake was 7.9 g/day. In total, 16.9% of the patients reported  
13  
14 249 regular dietary supplementation (i.e., at least once per week during the last four weeks) of  
15  
16 250 folic acid. Over half of all participants (54.6%) reported adherence to the physical activity  
17  
18 251 guidelines of at least 150 minutes per week of moderate-to-vigorous physical activity.

19 252 Regarding clinical characteristics, 57.0% of participants were diagnosed with colon  
20  
21 253 cancer, 33.9% with rectal cancer, and 1.1% with rectosigmoid cancer (8.1% were of unknown  
22  
23 254 tumor subsite). In total, 26.0% were diagnosed with stage I, 28.7% with stage II, and 40.2%  
24  
25 255 with stage III CRC. Approximately 1% of participants were classified with an unspecified  
26  
27 256 cancer stage, as distinction between stage I and II or II and III was not possible, and for 4.4%  
28  
29 257 of the total population the cancer stage was unknown. In total, 89.3% of patients underwent  
30  
31 258 surgery, whereas neoadjuvant chemotherapy was administered to 10.6% of patients and  
32  
33 259 26.8% received adjuvant chemotherapy. Neoadjuvant radiotherapy was administered to  
34  
35 260 20.7% of patients and adjuvant radiotherapy in 9.4% of the population.

### 36 261 **Patient and public involvement**

37 262 Patients and the public were not involved in the design, conduct, reporting or dissemination  
38  
39 263 plans of this research.

### 41 264 **How often have study participants been followed up?**

42 265 At each study site, collection of biospecimen, clinical, demographic, questionnaire and  
43  
44 266 anthropometric data occurred at baseline, and at six and twelve months following recruitment.  
45  
46 267 Baseline measurements in CORSA, COLON and EnCoRe have been performed at diagnosis  
47  
48 268 (preferably prior to any cancer treatment) while in the ColoCare Study such measurements  
49  
50 269 have been done prior to surgery (i.e. neoadjuvant treatment might have been applied prior to  
51  
52 270 baseline blood and data collection).

53  
54  
55 271 Blood samples at baseline were collected from n=2,132 (88.8%) study participants.  
56  
57 272 N=1,537 (64.0%) participants donated blood at the 6 month and n=614 (25.6%) at the 12  
58  
59 273 month follow-up time point. Additionally, n=251 (10.5%) EnCoRe patients provided blood  
60

274 samples at 6 weeks post-treatment, a subset specifically of interest at the Maastricht study  
275 site.

276 **What has been measured/recorded within the FOCUS Consortium?**

277 Harmonized baseline and follow-up time points are summarized in **Table 2** and are briefly  
278 described below.

**Table 2: Variables available at baseline, and at 6 and 12 month follow-up within the FOCUS Consortium.**

| Category                      | Variables                           | Baseline | 6m | 12m |
|-------------------------------|-------------------------------------|----------|----|-----|
| <b>Demographics</b>           | Age                                 | x        | x  | x   |
|                               | Gender                              | x        |    |     |
|                               | Highest education                   | x        |    |     |
|                               | Social status                       | x        |    |     |
|                               | Height                              | x        |    |     |
|                               | Weight                              | x        | x  | x   |
|                               | BMI                                 | x        | x  | x   |
|                               | Smoking status                      | x        | x  | x   |
|                               | Smoking duration                    | x        | x  | x   |
|                               | Smoking pack years                  | x        | x  | x   |
|                               | Menopausal status                   | x        |    |     |
|                               | Postmenopausal hormone use          | x        |    |     |
|                               | Race                                | x        |    |     |
| <b>Cancer characteristics</b> | Cancer site                         | x        |    |     |
|                               | Cancer stage                        | x        |    |     |
|                               | TNM classification                  | x        |    |     |
| <b>Treatment</b>              | Preoperative chemotherapy           | x        |    |     |
|                               | Preoperative radiotherapy           | x        |    |     |
|                               | Surgery                             | x        | x  |     |
|                               | Postoperative chemotherapy          |          | x  | x   |
|                               | Postoperative radiotherapy          |          | x  | x   |
| <b>Supplement intake</b>      | Folic acid supplements              | x        | x  | x   |
|                               | Vitamin B <sub>2</sub> supplements  | x        | x  | x   |
|                               | Vitamin B <sub>6</sub> supplements  | x        | x  | x   |
|                               | Vitamin B <sub>12</sub> supplements | x        | x  | x   |
|                               | Vitamin A supplements               | x        | x  | x   |
|                               | Vitamin C supplements               | x        | x  | x   |
|                               | Vitamin D supplements               | x        | x  | x   |

279



|                          |                                                                  |   |   |   |
|--------------------------|------------------------------------------------------------------|---|---|---|
| <b>Supplement intake</b> | Vitamin E supplements                                            | x | x | x |
|                          | Calcium supplements                                              | x | x | x |
|                          | Magnesium supplements                                            | x | x | x |
|                          | Iron supplements                                                 | x | x | x |
|                          | Multivitamins                                                    | x | x | x |
| <b>Dietary nutrients</b> | Folate equivalents                                               | x | x | x |
|                          | Vitamin B <sub>2</sub>                                           | x | x | x |
|                          | Vitamin B <sub>6</sub>                                           | x | x | x |
|                          | Vitamin B <sub>12</sub>                                          | x | x | x |
|                          | Vitamin A                                                        | x | x | x |
|                          | Vitamin C                                                        | x | x | x |
|                          | Vitamin D                                                        | x | x | x |
|                          | Vitamin E                                                        | x | x | x |
|                          | Total protein                                                    | x | x | x |
|                          | Total fat                                                        | x | x | x |
|                          | Total carbohydrate                                               | x | x | x |
|                          | Fibre                                                            | x | x | x |
|                          | Saturated fatty acids                                            | x | x | x |
|                          | Monounsaturated fatty acids                                      | x | x | x |
|                          | Polyunsaturated fatty acids                                      | x | x | x |
|                          | Alcohol                                                          | x | x | x |
|                          | Total energy                                                     | x | x | x |
| <b>Physical activity</b> | Light physical activity                                          | x | x | x |
|                          | Moderate physical activity                                       | x | x | x |
|                          | Vigorous physical activity                                       | x | x | x |
|                          | Adherence to physical activity guidelines                        | x | x | x |
| <b>Medical history</b>   | Diabetes mellitus                                                | x | x | x |
|                          | Asthma, Chronic Bronchitis, COPD, Emphysema                      | x |   |   |
|                          | Heart attack, Heart Failure                                      | x |   |   |
|                          | Hypertension                                                     | x |   |   |
|                          | Stroke                                                           | x |   |   |
|                          | Ulcer of Stomach or Duodenum                                     | x |   |   |
|                          | Hypothyroidism/Hyperthyroidism                                   | x |   |   |
|                          | Systemic Lupus Erythematosus                                     | x |   |   |
|                          | Inflammatory Bowel Disease (Crohn's disease, ulcerative colitis) | x |   |   |
|                          | Familial Adenomatous Polyposis                                   | x |   |   |

280

|                                       |                                                            |   |   |   |
|---------------------------------------|------------------------------------------------------------|---|---|---|
| <b>Medical history</b>                | Lynch Syndrome (hereditary nonpolyposis colorectal cancer) | x |   |   |
| <b>Regular medication use</b>         | Aspirin                                                    | x | x | x |
|                                       | NSAID                                                      | x | x | x |
|                                       | Ibuprofen                                                  | x | x | x |
|                                       | Naproxen                                                   | x | x | x |
|                                       | Celecoxib/Etoricoxib                                       | x | x | x |
| <b>Health-related quality of life</b> | EORTC QLQ-C30                                              | x | x | x |
|                                       | EORTC QLQ-CR29                                             | x | x | x |
|                                       | EORTC QLQ-CIPN20                                           | x | x | X |
| <b>General information</b>            | Date of questionnaire completion                           | x | x | x |
|                                       | Date of blood collection                                   | x | x | x |
|                                       | Freeze-thaw cycles of blood samples                        | x | x | x |
|                                       | Hemolysis                                                  | x | x | x |
|                                       | Time between blood draw and processing/storage             | x | x | x |

NSAID=non-steroidal anti-inflammatory drug; EORTC=European Organization for Research and Treatment of Cancer; QLQ=quality of life questionnaire; C30=core 30-items; CR29=colon/rectum 29-items; CIPN20=chemotherapy-induced polyneuropathy 20-items.

281

## 282 Lifestyle and demographic data

283 ColoCare questionnaires and standardized Food Frequency Questionnaires (FFQ) are used to  
 284 assess intake of dietary supplements and medication, smoking, dietary intake and other health  
 285 behaviors at each study time point. In COLON, patients provide information on diet, lifestyle,  
 286 and supplement use via COLON questionnaires and FFQs. Patients from the CORSA Study  
 287 are requested to complete a questionnaire assessing anthropometric and demographic factors.  
 288 Patients enrolled in EnCoRe receive repeated home visits by trained dietitians, where  
 289 extensive measurements are performed that include assessment of demographic data, physical  
 290 activity (both questionnaire- and accelerometry-based) and smoking behavior (questionnaire  
 291 data), dietary intake (FFQs at diagnosis and 7-day food diaries at follow-up measurements),  
 292 supplement use (registered by dietitians), and anthropometry measurements.

## 293 Clinical data and outcomes - Medical chart abstraction

294 All cancers and medical diagnoses are classified according to ICD-10 (International  
 295 Classification of Diseases, Tenth Revision) codes. Details on CRC treatment, including type

1  
2  
3 296 of treatment regimens and treatment toxicity, are abstracted via medical record for all cohorts.  
4  
5 297 Detailed information on the primary outcomes of interest, CRC recurrence and survival, are  
6  
7 298 ascertained through reviews of medical records, pathology reports, and imaging reports  
8  
9 299 documenting the diagnosis of a recurrence. Data on recurrence and vital status is  
10  
11 300 supplemented from the clinical cancer registries and survival data is verified by the inhabitant  
12  
13 301 registries that exist at all study sites. For COLON and EnCoRe, all data on recurrence are  
14  
15 302 retrieved in collaboration with the Netherlands Cancer Registry. Moreover, survival data for  
16  
17 303 CORSA participants was obtained by the Main Association of Austrian Social Insurance  
18  
19 304 Carriers as well as from Statistics Austria.

### 20 305 Patient-reported outcomes

21  
22 306 Health-related quality of life is assessed by the validated and widely used cancer-specific 30-  
23  
24 307 item core questionnaire QLQ-C30 and the 29-item CRC module QLQ-CR29, developed by  
25  
26 308 the European Organization for Research and Treatment of Cancer (EORTC).<sup>22</sup>  
27  
28 309 Chemotherapy-induced peripheral neuropathy (CIPN), which is a common toxicity in CRC  
29  
30 310 patients, is measured by the EORTC QLQ-CIPN20.<sup>23</sup> Patient-reported outcomes are available  
31  
32 311 for ColoCare Heidelberg, COLON and EnCoRe.

### 33 312 Biomarkers of FOCM

34  
35 313 Blood is processed in identical settings across all study centers. Plasma (CORSA, COLON  
36  
37 314 and EnCoRe) and serum (for the three ColoCare Study sites) samples were collected and  
38  
39 315 immediately centrifuged, aliquoted, and stored at -80°C.

40  
41 316 All biological analyses were performed at BEVITAL AS (Bergen, Norway,  
42  
43 317 <http://www.bevital.no>), which carried out metabolic profiling of biomarkers allocated to seven  
44  
45 318 complementary analytical platforms. Apart from analyses of microbiological active folate<sup>24</sup>  
46  
47 319 and vitamin B<sub>12</sub><sup>25</sup>), all analyses were based on mass spectrometry. Circulating folate, separate  
48  
49 320 folate species, 5-methyltetrahydrofolate (the main form in plasma), folic acid (folate in  
50  
51 321 supplements), 4a-OH 5-methyltetrahydrofolate (the primary oxidation form of circulating  
52  
53 322 folate), folate catabolites (p-aminobenzoylglutamate and acetyl p-aminobenzoylglutamate)<sup>26</sup>,  
54  
55 323 B<sub>6</sub>, B<sub>1</sub> and B<sub>3</sub> vitamins, kynurenines, cotinine, trans-3'-hydroxycotinine, trigonelline<sup>27</sup>,  
56  
57 324 choline and its metabolites, creatinine, methylhistidines, arginine and methylated arginines<sup>28</sup>  
58  
59 325 were analyzed by liquid chromatography-tandem mass spectroscopy, whereas other amino  
60  
326 acids, in addition to total homocysteine, total cysteine and methylmalonic acid were analyzed

327 by gas chromatography-tandem mass spectroscopy.<sup>29</sup> C-reactive protein (hsCRP) and  
 328 cystatin C and its variants were measured by MALDI-TOF mass spectroscopy.<sup>30</sup>

329 A comprehensive overview of the panel of biomarkers measured in blood samples of  
 330 patients enrolled in the FOCUS Consortium is provided in **Table 3**.

**Table 3: Measured metabolites and biomarkers within the FOCUS Consortium**

| <b>Folate and one-carbon metabolites</b>                   | <b>Abbreviation</b> | <b>Description</b>                       |
|------------------------------------------------------------|---------------------|------------------------------------------|
| <b>Anthranilic acid</b>                                    | AA                  | Tryptophan metabolite                    |
| <b>Asymmetric dimethylarginine</b>                         | ADMA                | Inhibitor of nitric oxide synthase       |
| <b><math>\alpha</math>-Ketoglutaric acid</b>               | aKG                 | Keto acid of the Krebs cycle             |
| <b>Alanine</b>                                             | Ala                 | Amino acid                               |
| <b>Acetamidobenzoylglutamate</b>                           | apABG               | Folate catabolite                        |
| <b>Arginine</b>                                            | Arg                 | Amino acid                               |
| <b>Asparagine</b>                                          | Asn                 | Amino acid                               |
| <b>Aspartic acid</b>                                       | Asp                 | Amino acid                               |
| <b>Betaine</b>                                             | Betaine             | Methyl donor                             |
| <b>Choline</b>                                             | Choline             | Methyl donor                             |
| <b>C-reactive protein</b>                                  | hsCRP               | Inflammatory marker                      |
| <b>Cystatin C-desS</b>                                     | CnCds               | Cystatin C isoform                       |
| <b>Cystatin C-desSSP</b>                                   | CnDcssp             | Cystatin C isoform                       |
| <b>Cystatin C</b>                                          | CnCn                | Marker of kidney function                |
| <b>3Pro-OH cystatin C</b>                                  | CnCco               | Cystatin C isoform                       |
| <b>3Pro-OH cystatin C-desS</b>                             | CnCods              | Cystatin C isoform                       |
| <b>Total concentration of detected cystatin C isoforms</b> | CnCt                | Marker of kidney function                |
| <b>Cobalamin</b>                                           | B <sub>12</sub>     | Vitamin B <sub>12</sub>                  |
| <b>Cotinine</b>                                            | Cot                 | Nicotine metabolite                      |
| <b>Creatinine</b>                                          | Creat               | Marker of kidney function                |
| <b>C-reactive protein</b>                                  | CRP                 | Inflammation                             |
| <b>Cystathionine</b>                                       | Cysta               | Thioether, transsulfuration intermediate |
| <b>Dimethylglycine</b>                                     | DMG                 | Betaine metabolite                       |
| <b>Folic acid</b>                                          | B <sub>9</sub>      | Synthetic form of folate                 |
| <b>Flavin mononucleotide</b>                               | FMN                 | B <sub>2</sub> vitamin                   |
| <b>5-Formyl-tetrahydrofolate</b>                           | fTHF                | Folate species                           |
| <b>Glutamine</b>                                           | Gln                 | Amino acid                               |
| <b>Glutamic acid</b>                                       | Glu                 | Amino acid                               |
| <b>Glycine</b>                                             | Gly                 | Amino acid                               |
| <b>3-Hydroxyanthranilic acid</b>                           | HAA                 | Tryptophan metabolite                    |
| <b>Homoarginine</b>                                        | hArg                | Amino acid                               |
| <b>Histidine</b>                                           | Hist                | Tryptophan metabolite                    |
| <b>3-Hydroxykynurenine</b>                                 | HK                  | Tryptophan metabolite                    |
| <b>4-Alfa-hydroxy-5-methyl-THF</b>                         | hmTHF               | Folate oxidation product                 |
| <b>Isoleucine</b>                                          | Ile                 | Amino acid                               |

|                                   |          |                                              |
|-----------------------------------|----------|----------------------------------------------|
| <b>Kynurenic acid</b>             | KA       | Tryptophan metabolite                        |
| <b>Kynurenine</b>                 | Kyn      | Tryptophan metabolite                        |
| <b>Leucine</b>                    | Leu      | Amino acid                                   |
| <b>Lysine</b>                     | Lys      | Amino acid                                   |
| <b>3-Methylhistidine (3-MH)</b>   | m3His    | Marker of muscle degradation and meat intake |
| <b>1-Methylhistidine (1-MH)</b>   | m1His    | Marker of muscle degradation and meat intake |
| <b>Methionine</b>                 | Met      | Amino acid                                   |
| <b>Methionine sulfoxide</b>       | MetSo    | Oxidation product of Met                     |
| <b>Methylmalonic acid</b>         | MMA      | Marker of B <sub>12</sub> status             |
| <b>N1-methylnicotinamide</b>      | mNAM     | B <sub>3</sub> vitamin                       |
| <b>5-Methyl-tetrahydrofolate</b>  | mTHF     | Folate species                               |
| <b>Nicotinic acid</b>             | NA       | B <sub>3</sub> vitamin                       |
| <b>Nicotinamide</b>               | NAM      | B <sub>3</sub> vitamin                       |
| <b>Neopterin</b>                  | Neopt    | Inflammatory marker                          |
| <b>Trans-3'-hydroxycotinine</b>   | OHCot    | Nicotine metabolite                          |
| <b>Ornithine</b>                  | Orn      | Amino acid                                   |
| <b>4-Pyridoxic acid</b>           | PA       | Vitamin B <sub>6</sub> catabolite            |
| <b>Para-aminobenzoylglutamate</b> | pABG     | Folate catabolite                            |
| <b>Phenylalanine</b>              | Phe      | Amino acid                                   |
| <b>Picolinic acid</b>             | Pic      | Tryptophan metabolite                        |
| <b>Pyridoxal</b>                  | PL       | B <sub>6</sub> vitamin                       |
| <b>Pyridoxal 5'-phosphate</b>     | PLP      | B <sub>6</sub> vitamin                       |
| <b>Pyridoxine</b>                 | PN       | Synthetic form of vitamin B <sub>6</sub>     |
| <b>Proline</b>                    | Pro      | Amino acid                                   |
| <b>Quinolinic acid</b>            | QA       | Tryptophan metabolite                        |
| <b>Riboflavin</b>                 | Ribo     | Main circulating B <sub>2</sub> form         |
| <b>Symmetric dimethylarginine</b> | SDMA     | Marker of renal function                     |
| <b>Serine</b>                     | Ser      | Amino acid                                   |
| <b>Folate</b>                     | spFolate | Microbiologically active folate              |
| <b>Total cysteine</b>             | tCys     | Amino acid                                   |
| <b>Homocysteine</b>               | tHcy     | Marker of folate and B <sub>12</sub> status  |
| <b>Thiamine</b>                   | Thi      | B <sub>1</sub> vitamin                       |
| <b>Threonine</b>                  | Thr      | Amino acid                                   |
| <b>Trimethylamineoxide</b>        | TMAO     | Choline metabolite                           |
| <b>Trimethyllysine</b>            | TML      | Amino acid                                   |
| <b>Thiamine monophosphate</b>     | TMP      | B <sub>1</sub> vitamin                       |
| <b>Trigonelline</b>               | Trig     | Marker of coffee consumption                 |
| <b>Tryptophan</b>                 | Trp      | Amino acid                                   |
| <b>Valine</b>                     | Val      | Amino acid                                   |
| <b>Leucine</b>                    | Leu      | Amino acid                                   |
| <b>Xanthurenic acid</b>           | XA       | Tryptophan metabolite                        |
| <b>Kyn/Trp ratio</b>              | KTR      | Marker of immune activation                  |
| <b>HK/XA ratio</b>                |          | Marker of B <sub>6</sub> status              |

331

**What has the FOCUS Consortium found? Key findings and publications**

The FOCUS Consortium provides a unique opportunity to conduct comprehensive research on folate and FOCM biomarkers status in the tertiary prevention of CRC using data collected both at diagnosis and during standardized follow-up time points. This well-characterized study design provides sufficient statistical power to discern prospective associations with relevant clinical outcomes, including CRC recurrence and survival within relevant subgroups.

Key findings and publications

We investigated associations of circulating concentrations of folate, folic acid, and folate catabolites pABG and apABG, measured around time of diagnosis, with recurrence and survival among 2024 patients diagnosed with stage I-III CRC within the international FOCUS Consortium. We did not observe any statistically significant associations for folate, pABG, and apABG concentrations. However, an increased risk of cancer recurrences was observed among patients with higher compared to lower circulating folic acid concentrations.<sup>31</sup> Further, Kiblawi et al. measured associations between one-carbon metabolites, inflammation- and angiogenesis-related biomarkers in a cross-sectional analysis of 238 patients from the ColoCare Heidelberg cohort. The study showed that specific folate species within the one-carbon metabolism pathway are associated with both inflammation and angiogenesis pathways among CRC patients. Our findings reinforce the notion that B vitamins involved in the one-carbon metabolism may be correlated with carcinogenic processes.<sup>32</sup> This and further research will support the evidence base needed for the development of dietary guidelines for CRC patients.

Further, we investigated circulating concentrations of nine biomarkers related to the B-vitamins folate, riboflavin, vitamin B<sub>6</sub>, and cobalamin, measured at diagnosis and six months post-diagnosis, in association with health-related quality of life as assessed by the EORTC QLQ-C30 questionnaire six months post-treatment in three FOCUS cohorts (ColoCare Heidelberg, EnCoRe and COLON).<sup>33</sup> Higher pyridoxal 5'-phosphate (PLP) concentrations were cross-sectionally associated with better physical, role, and social functioning, and reduced fatigue six months post-diagnosis. Higher HKr (3-hydroxykynurenine:(kynurenic acid+xanthurenic acid+3-hydroxyanthranilic acid+anthranilic acid)), an inverse marker of vitamin B<sub>6</sub> status, was cross-sectionally associated with worse global quality of life, and lower physical and role functioning. Dose-response relations were observed for PLP with global

1  
2  
3 363 quality of life, physical, role, and social functioning. No associations were observed for  
4  
5 364 changes in biomarker concentrations between diagnosis and six months with quality of life  
6  
7 365 outcomes. We therefore concluded that higher vitamin B<sub>6</sub> status was associated with better  
8  
9 366 quality of life at six months post treatment and that further study is needed to clarify the role  
10  
11 367 of vitamin B<sub>6</sub> in relation to quality of life.

### 12 368 Previous relevant findings from individual cohorts within the consortium

13  
14  
15 369 To date, individual cohorts from the FOCUS Consortium have initiated the examination of  
16  
17 370 dietary supplement use and dietary habits over time. Among CRC patients enrolled in the  
18  
19 371 ColoCare Study the proportion of supplement users was found to be highest post-diagnosis  
20  
21 372 (35%).<sup>34</sup> Moreover, within an international investigation including ColoCare participants from  
22  
23 373 multiple sites, Ulrich et al. showed differences in plasma folate concentration between  
24  
25 374 Heidelberg and the US sites, probably reflecting variation in folic acid fortification and  
26  
27 375 supplement use.<sup>11</sup> Furthermore, ColoCare has published data on RECQ helicase expression<sup>35</sup>,  
28  
29 376 NTRK3<sup>36</sup>, RET<sup>37</sup>, tumor-infiltrating lymphocytes and T cell receptor sequences<sup>38</sup>, 25-25-  
30  
31 377 hydroxyvitamin D<sub>3</sub><sup>11 39</sup>, DNA methylation<sup>40-43</sup>, miRNAs<sup>44 45</sup>, fecal microbiota<sup>46-48</sup>,  
32  
33 378 metabolomics and transcriptomics<sup>49-51</sup>, plasma proteins<sup>52</sup>, gene expression<sup>53</sup>, branched-chain  
34  
35 379 amino acids<sup>54</sup>, genetic variants<sup>55</sup>, body composition<sup>51 56 57</sup>, physical activity<sup>39</sup>, and dietary  
36  
37 380 patterns<sup>4</sup> in CRC patients. Within the COLON study, results have been published on body  
38  
39 381 weight trajectories<sup>58</sup>, changes in lifestyle<sup>59</sup>, 25-hydroxy vitamin D levels<sup>60 61</sup>, and  
40  
41 382 inflammation markers<sup>62</sup> over time, as well as vitamin D<sup>62</sup>, calcium or magnesium intake<sup>63</sup>,  
42  
43 383 physical activity<sup>64</sup>, inflammation<sup>65 66</sup>, skeletal muscle mass<sup>67</sup>/ density<sup>68</sup> and other measures of  
44  
45 384 body composition<sup>69</sup> in relation to cancer recurrence, survival, or physical functioning or  
46  
47 385 fatigue. Moreover, in a subset of patients undergoing chemotherapy, dietary factors in relation  
48  
49 386 to chronic CIPN<sup>70 71</sup> as well as chemosensory perception and food preferences<sup>72</sup> were studied.  
50  
51 387 The Austrian CORSA Study has published results on genomic data<sup>73-75</sup>, telomere length<sup>76</sup>,  
52  
53 388 DNA repair processes<sup>77</sup>, tumor autoantibodies<sup>78</sup> as well as metabolomics.<sup>31 79</sup> To date,  
54  
55 389 publications from the EnCoRe Study have reported on associations of physical activity and  
56  
57 390 sedentary behaviour<sup>80-83</sup>, adherence to lifestyle guidelines<sup>84</sup>, and parameters of body  
58  
59 391 composition<sup>85 86</sup> measured through CT scans with quality of life, functioning and fatigue in  
60  
392 CRC survivors. Recently, longitudinal associations between supplement use and fatigue were  
393 investigated from diagnosis to 2 years post-CRC treatment. No overall association between  
394 supplement use and fatigue was found but results suggest that increased levels of fatigue may  
395 be a reason for the use of supplements among CRC survivors.<sup>87</sup> Higher concentrations of

1  
2  
3 396 25OHD3 were longitudinally associated with better global quality of life and less fatigue in  
4  
5 397 colorectal cancer survivors within EnCoRe suggesting a potential beneficial role of vitamin D  
6  
7 398 in colorectal cancer survivors.<sup>33</sup> In a mixed-method study using data of the EnCoRe study,  
8  
9 399 colorectal cancer (treatment) related health and functioning problems negatively impacted the  
10  
11 400 ability of nearly 1 in 5 long-term CRC survivors to participate in everyday life situations and  
12  
13 401 their satisfaction with participation.<sup>88</sup> The validity of the food frequency questionnaire for  
14  
15 402 measuring dietary intake among survivors of colorectal cancer within the EnCoRe study  
16  
17 403 appeared to be moderate to good for most nutrients and food groups, relative to a 7-day  
18  
19 404 dietary record.<sup>89</sup> Prediction models that we developed for estimating 1-year risk of low health-  
20  
21 405 related quality of life in seven domains in colorectal cancer survivors performed well when  
22  
23 406 externally validated among survivors within the EnCoRe and COLON studies.<sup>90</sup>

24  
25  
26  
27  
28  
29  
30  
31  
32  
33  
34  
35  
36  
37  
38  
39  
40  
41  
42  
43  
44  
45  
46  
47  
48  
49  
50  
51  
52  
53  
54  
55  
56  
57  
58  
59  
60



### 408 **What are the main strengths and weaknesses of the FOCUS Consortium?**

409 This is the largest consortium to date addressing the research question of folate and FOCM  
410 biomarkers in relation to survival, recurrence, treatment toxicity, and health-related quality of  
411 life outcomes in CRC patients. The cohorts included in the FOCUS Consortium are designed  
412 to enable future pooling of data.<sup>20</sup> For that reason, methodologies, time points and  
413 measurement instruments generally overlap, with each study presenting unique features such  
414 as additional blood collection at the 6-week follow-up time point within the EnCoRe Study  
415 and blood draws during chemotherapy within the COLON Study. The pooled sample size  
416 provides sufficient power to investigate subgroup analyses across CRC patients, e.g., within  
417 groups of patients who underwent 5-fluorouracil based chemotherapy or stratified by disease  
418 stage. Furthermore, the assessment of biomarkers related to FOCM are conducted at a single,  
419 state-of-the art laboratory and the biological materials are processed and stored according to  
420 standardized operation protocols across all study sites, enabling precise and accurate  
421 measurements of FOCM biomarkers. The study population is predominantly based on  
422 European cohorts (90.4%) in countries that have not implemented mandatory folic acid  
423 fortification. This enables us to study a population where dietary intake and dietary  
424 supplement use determine differences in folate status, yielding information of direct relevance  
425 to cancer patients. However, the generalizability of results to populations that have introduced  
426 folic acid fortification, including United States, might therefore also be limited.<sup>91</sup>

427 Another limitation of the consortium includes differences in collection strategies of the  
428 baseline study time point across included studies: CORSA, COLON and EnCoRe are  
429 recruiting CRC patients at diagnosis, preferably prior to any cancer treatment while ColoCare  
430 is recruiting patients prior to surgery (i.e. neoadjuvant treatment might have occurred prior to  
431 baseline blood and data collection). Nevertheless, the ColoCare protocol requires that no  
432 blood draw occurs within 2 weeks of neoadjuvant or adjuvant chemotherapy, limiting the  
433 influence of ongoing treatments on blood biomarkers. In some cohorts, the timing with  
434 respect to adjuvant chemotherapy is less clearly defined and this will be carefully considered  
435 in sensitivity analyses. Furthermore, survivor bias – a type of selection bias – may be  
436 introduced as some patients died or did not complete follow-up questionnaires or did not  
437 provide blood samples. It is possible that patients who experience more severe toxicities,  
438 worse clinical outcomes or worse health-related quality of life are underrepresented among  
439 those patients who completed follow-up measurements.<sup>4</sup>

440

1  
2  
3 441 **Can I get hold of the data? Where can I find out more?**  
4

5 442 A substantial amount of time has been spent in creating the harmonized dataset of baseline  
6 443 variables from cohorts within the FOCUS Consortium, with follow-up data collection and  
7  
8 444 FOCM biomarker analyses. Any person interested in learning about the FOCUS Consortium  
9  
10 445 or in getting access to FOCUS data and in-depth analyses can contact the coordinating study  
11  
12 446 PIs Prof. Andrea Gsur ([andrea.gsur@meduniwien.ac.at](mailto:andrea.gsur@meduniwien.ac.at)) and Prof. Cornelia Ulrich  
13  
14 447 ([neli.ulrich@hci.utah.edu](mailto:neli.ulrich@hci.utah.edu)). Requests for data will be discussed and decided by all PIs and will  
15  
16 448 require a Data Transfer Agreement.  
17  
18  
19  
20  
21  
22  
23  
24  
25  
26  
27  
28  
29  
30  
31  
32  
33  
34  
35  
36  
37  
38  
39  
40  
41  
42  
43  
44  
45  
46  
47  
48  
49  
50  
51  
52  
53  
54  
55  
56  
57  
58  
59  
60

For peer review only

## 449 **FOCUS Consortium profile in a nutshell**

- 450 • The FOCUS Consortium is an international prospective cohort with newly-diagnosed non-  
451 metastatic (stage I-III) colorectal cancer (CRC) patients, designed to study the  
452 associations between folate and folate-mediated one-carbon metabolism (FOCM)  
453 biomarkers and CRC prognosis, to provide clinically relevant advice to cancer patients  
454 and define future tertiary prevention strategies.
- 455 • 2,401 women and men age 18 years and older newly-diagnosed with a primary invasive  
456 CRC, stage I-III, from the ColoCare Study at the University of Heidelberg in Heidelberg,  
457 Germany; the ColoCare Study at the Huntsman Cancer Institute in Salt Lake City, Utah,  
458 USA; the ColoCare Study at the Fred Hutchinson Cancer Research Center in Seattle,  
459 Washington, USA; CORSA Study at the Medical University of Vienna in Austria; the  
460 COLON Study at Wageningen University in the Netherlands; and the EnCoRe Study at  
461 Maastricht University Medical Center in the Netherlands were eligible and recruited  
462 between 2003 and 2016.
- 463 • Blood samples at baseline were collected from n=2,132 (88.8%) study participants.  
464 N=1,537 (64.0%) participants donated blood at the 6 month and n=614 (25.6%) at the 12  
465 month follow-up time points.
- 466 • The harmonized dataset comprises sociodemographic data and data on lifestyle behaviors  
467 (e.g., dietary supplement use, dietary nutrient intake, and physical activity), clinical data  
468 (e.g., cancer characteristics, treatment regimens), health-related quality of life, and  
469 biomarkers of one-carbon metabolism. Follow-up data additionally includes CRC  
470 recurrence, survival, treatment-induced toxicity, and health-related quality of life.
- 471 • We will welcome new collaborations, for which requests can be sent to the corresponding  
472 authors, PIs Prof. Andrea Gsur ([andrea.gsur@meduniwien.ac.at](mailto:andrea.gsur@meduniwien.ac.at)) and Prof. Cornelia Ulrich  
473 ([neli.ulrich@hci.utah.edu](mailto:neli.ulrich@hci.utah.edu)).

## 475 **Acknowledgements**

476 ColoCare Heidelberg: We thank all ColoCare study participants, the liquid biobank of the  
477 National Center for Tumor Diseases for storage of the blood samples according to the SOPs  
478 of the Biomaterialbank Heidelberg (BMBH), Michaela Magenreuter, Maria Thomalla-Starzl,  
479 Mareen, Dupovac, Marzena Knysok-Sypniewski, Lin Zielske, Anett Brendel, Renate  
480 Skatula, and Marita Wenzel for laboratory work, Rifraz Farook, Dr. Werner Diehl and Inna  
481 Müller for data management and clinical follow-up data collection, Dr. Clare Abbenhardt-

1  
2  
3 482 Martin, Susanne Jakob, Judith Kammer for patient recruitment and follow-up, and Dr. Petra  
4 483 Schrotz-Kind and Dr. Jürgen Boehm for study coordination.

5  
6  
7 484 ColoCare Huntsman Cancer Institute: We thank all ColoCare study participants, the  
8 485 biorepository at Huntsman Cancer Institute for storage of the blood samples according to  
9 486 standardized SOPs, and Christy Warby for laboratory work. We thank Tyler Farr, Sarah  
10 487 Fischbuch and Debra Ma for data management and clinical follow-up data collection. We are  
11 488 very grateful for patient recruitment and follow-up by Elisa Santori, Hanna Omar-Payne and  
12 489 Marissa Grande, and Dr. Jürgen Boehm for study coordination.

13  
14  
15  
16  
17  
18 490 ColoCare Fred Hutchinson Cancer Research Center: We thank all ColoCare study  
19 491 participants, the biorepository at Fred Hutchinson Cancer Research Center for storage of the  
20 492 blood samples according to standardized SOPs and the laboratory team for sample processing.  
21 493 We thank the ColoCare team for patient recruitment and follow-up and data management.

22  
23  
24  
25  
26 494 EnCoRe: We would like to thank all participants of the EnCoRe study and the health  
27 495 professionals in the three hospitals involved in the recruitment of participants of the study:  
28 496 Maastricht University Medical Center+, VieCuri Medical Center, and Zuyderland Medical  
29 497 Center. We would also like to thank the MEMIC center for data and information management  
30 498 for facilitating the logistic processes and data management of our study. Finally, we would  
31 499 like to thank the research dieticians and research assistant who are responsible for patient  
32 500 inclusion and follow-up, performing home visits, as well as data collection and processing.

33  
34  
35  
36  
37  
38  
39 501 CORSA: We kindly thank all individuals who agreed to participate in the CORSA study.  
40 502 Furthermore, we thank Thomas Bachleitner-Hofmann, Michael M. Bergmann, Judith Karner-  
41 503 Hanusch and Anton Stift (Department of Surgery, Medical University of Vienna), Karl Mach,  
42 504 Azita Deutinger-Permoon (KRAGES, Austria), and their co-workers for supporting CORSA  
43 505 recruitment. In addition, we would like to acknowledge Elisabeth Feik, Philipp Hofer and  
44 506 Cornelia Zöchmeister, for patient recruitment, sample processing, and follow-up.

45  
46  
47  
48  
49  
50 507 COLON: The authors would like to thank the COLON participants, COLON investigators at  
51 508 Wageningen University & Research and the involved co-workers in the participating  
52 509 hospitals.

53  
54  
55  
56 510  
57  
58  
59  
60

## 511 **Contributors**

512 BG, MW, EK, PMU, CMU, AG, ABU, NH: conceived of the project, developed the overall  
513 research plan, and provided study oversight; BG, EHvR, ANH, SB, AJMRG, AU, JO, JLK,  
514 VD, RK, TG, TL, GK, TK, DEK, FJBvD, MJLB, AB, CIL, WMG, KV: conducted hands-on  
515 experiments and data collection; BG, EHvR, ANH, SB, AJMRG, AU, JO, JLK, VD, RK, TG,  
516 TL, GK, TK, DEK, FJBvD, CIL, WMG, KV, CMU: provided essential reagents or essential  
517 materials, databases, and so forth, necessary for the research; BG, EHvR, MJLB, AB, ANH,  
518 VD, SB: analyzed the data or performed the statistical analysis and made a major contribution  
519 to writing the paper; BG, MS, EK, PMU, ABU, MW, AG, CMU: had primary responsibility  
520 for the final content; all authors: reviewed the manuscript critically, provided feedback, and  
521 read and approved the final manuscript.

522

## 523 **Funding**

524 The FOCUS Consortium is an ERA-NET (European Research Area Network) on Translational  
525 Cancer Research (TRANSCAN) project funded by the local research funding agencies  
526 (German Ministry of Education and Research, Germany, 01KT1503; Dutch Cancer Society  
527 with grant number UW2014-6877, the Netherlands; FWF Austrian Science Fund, Austria  
528 (API02104FW); Research Council Norway/Norwegian Cancer Society (RNC), Norway). The  
529 COLON study is further sponsored by Wereld Kanker Onderzoek Fonds, including funds  
530 from grant 2014/1179 as part of the World Cancer Research Fund International Regular Grant  
531 Programme; Alpe d'Huzes/Dutch Cancer Society (UM 2012-5653, UW 2013-5927, UW  
532 2015-7946); and ERA-NET on Translational Cancer Research (TRANSCAN/Dutch Cancer  
533 Society: UW2013-6397 and the Netherlands Organization for Health Research and  
534 Development (ZonMw), the Netherlands). The EnCoRe study was supported by grants from  
535 the Stichting Alpe d'HuZes within the research program 'Leven met kanker' of the Dutch  
536 Cancer Society (Grant No. UM-2010-4867 and UM-2012-5653), and by grants from  
537 Kankeronderzoekfonds Limburg as part of Health Foundation Limburg (Grant No.  
538 00005739), and by a grant from Wereld Kanker Onderzoek Fonds (WKOF), as part of the  
539 World Cancer Research Fund International grant programme (grant number 2016/1620).

540 Biljana Gigic was funded by the ERA-NET on Translational Cancer Research (TRANSCAN),  
541 the German Ministry of Education and Research project 01KT1503, the National Institutes of  
542 Health/National Cancer Institute (NHI/NCI) projects R01 CA189184 and U01 CA206110, the

1  
2  
3 543 Stiftung LebensBlicke, and the Matthias-Lackas Foundations. Eline H. van Roekel was  
4  
5 544 funded by the Wereld Kanker Onderzoek Fonds (WKOF), part of the World Cancer Research  
6  
7 545 Fund International grant programme (grant number 2016/1620). Martijn Bours was funded by  
8  
9 546 Alpe d'HuZes within the research program 'Leven met kanker' of the Dutch Cancer Society  
10 547 (Grant No. UM-2012-5653). Dieuwertje E. Kok is supported by a Veni grant of the  
11  
12 548 Netherlands Organisation for Scientific Research (grant no. 016.Veni.188.082). Andreana N.  
13  
14 549 Holowatyj was supported by the National Institutes of Health under Ruth L. Kirschstein  
15  
16 550 National Research Service Award T32 HG008962 from the National Human Genome  
17  
18 551 Research Institute. Nina Habermann was funded by the TRANSCAN project 01KT1512,  
19  
20 552 Cornelia M. Ulrich and Jennifer Ose were funded by the Huntsman Cancer Foundation, and  
21  
22 553 NIH/NCI projects R01 CA189184, R01 CA207371, U01 CA206110, U01 CA206110 and P30  
23  
24 554 CA042014. NIH grants (P30 CA15704, U01 CA152756, R01 CA194663, R01 CA220004,  
25  
26 555 P01 CA077852), Rodger C. Haggitt Endowed Chair, R.A.C.E. Charities, Cottrell Family  
27  
28 556 Fund, Listwin Family Foundation, Seattle Translational Tumor Research program, Fred  
29  
30 557 Hutchinson Cancer Research Center (William M. Grady). Stefanie Brezina was funded by the  
31  
32 558 ERA-NET on Translational Cancer Research (TRANSCAN) project FOCUS I2104-B26 and  
33  
34 559 the ERA-NET on Translational Cancer Research (TRANSCAN) project MetaboCCC I 1578 –  
35  
36 560 B19. J.L. Koole was supported by Kankeronderzoekfonds Limburg as part of Health  
37  
38 561 Foundation Limburg (Grant No. 00005739).

#### 36 562 Disclaimer

37  
38 563 The funder had no role in the design of the FOCUS consortium, or conduct of the study,  
39  
40 564 collection, management, analysis, and interpretation of the data, preparation, review, or  
41  
42 565 approval of the manuscript, or decision to submit the manuscript for publication.

#### 43 44 566 **Competing interests**

45  
46 567 None declared.

#### 47 48 568 **Patient consent for publication**

49  
50 569 Not applicable.

#### 51 52 570 **Patient and public involvement**

53  
54 571 Patients and/or the public were not involved in the design, or conduct, or reporting, or  
55  
56 572 dissemination plans of this research.

57  
58  
59 573  
60

1  
2  
3 574 **Ethics approval**  
4  
5

6 575 The Heidelberg ColoCare Study was approved by the Ethics Committee of the Medical  
7 576 Faculty of Heidelberg (approval no. S-310/2001 and S-134/2016). The ColoCare Study at the  
8 577 Huntsman Cancer Institute and the Fred Hutchinson Cancer Research Center were approved  
9 578 by the respective IRBs (#77147 and #6407). For the CORSA study all subjects gave written  
10 579 informed consent and the study was approved by the institutional review boards:  
11 580 ‘Ethikkommission Burgenland’ (33/2010), by the ethical review committee of the Medical  
12 581 University of Vienna (1160/2016) and by the “Ethikkommission der Stadt Wien” (EK 06-  
13 582 150VK). The EnCoRe Study was approved by the Medical Ethics Committee of the  
14 583 Maastricht University Hospital and Maastricht University (METC 11-3-075).  
15  
16  
17  
18  
19  
20  
21  
22  
23  
24  
25  
26  
27  
28  
29  
30  
31  
32  
33  
34  
35  
36  
37  
38  
39  
40  
41  
42  
43  
44  
45  
46  
47  
48  
49  
50  
51  
52  
53  
54  
55  
56  
57  
58  
59  
60

584

585

## References

1. Ferlay J, Colombet M, Soerjomataram I, et al. Estimating the global cancer incidence and mortality in 2018: GLOBOCAN sources and methods. *International journal of cancer Journal international du cancer* 2019;144(8):1941-53. doi: 10.1002/ijc.31937 [published Online First: 2018/10/24]
2. De Angelis R, Sant M, Coleman MP, et al. Cancer survival in Europe 1999-2007 by country and age: results of EUROCare--5-a population-based study. *The Lancet Oncology* 2014;15(1):23-34. doi: 10.1016/S1470-2045(13)70546-1
3. Ferlay J, Colombet M, Soerjomataram I, et al. Cancer incidence and mortality patterns in Europe: Estimates for 40 countries and 25 major cancers in 2018. *European journal of cancer* 2018;103:356-87. doi: 10.1016/j.ejca.2018.07.005 [published Online First: 2018/08/14]
4. Gigic B, Boeing H, Toth R, et al. Associations Between Dietary Patterns and Longitudinal Quality of Life Changes in Colorectal Cancer Patients: The ColoCare Study. *Nutrition and cancer* 2017:1-10. doi: 10.1080/01635581.2018.1397707 [published Online First: 2017/12/16]
5. Velicer CM, Ulrich CM. Vitamin and mineral supplement use among US adults after cancer diagnosis: a systematic review. *Journal of clinical oncology : official journal of the American Society of Clinical Oncology* 2008;26(4):665-73. doi: 10.1200/JCO.2007.13.5905
6. Ulrich CM, Potter JD. Folate supplementation: too much of a good thing? *Cancer Epidemiol Biomarkers Prev* 2006;15(2):189-93. doi: 10.1158/1055-9965.EPI-152CO [published Online First: 2006/02/24]
7. Jatoi A, Williams B, Nichols F, et al. Is voluntary vitamin and mineral supplementation associated with better outcome in non-small cell lung cancer patients? Results from the Mayo Clinic lung cancer cohort. *Lung Cancer* 2005;49(1):77-84. doi: 10.1016/j.lungcan.2005.01.004 [published Online First: 2005/06/14]
8. Ferrucci LM, McCorkle R, Smith T, et al. Factors related to the use of dietary supplements by cancer survivors. *J Altern Complement Med* 2009;15(6):673-80. doi: 10.1089/acm.2008.0387
9. Miller JW, Ulrich CM. Folic acid and cancer--where are we today? *Lancet* 2013;381(9871):974-6. doi: 10.1016/S0140-6736(13)60110-5 [published Online First: 2013/01/29]
10. Kim YI. Folate and colorectal cancer: an evidence-based critical review. *Mol Nutr Food Res* 2007;51(3):267-92. doi: 10.1002/mnfr.200600191 [published Online First: 2007/02/14]
11. Ulrich CM, Toriola AT, Siegel EM, et al. Plasma 25-hydroxyvitamin D3, folate and vitamin B12 biomarkers among international colorectal cancer patients: a pilot study. *J Nutr Sci* 2013;2:e9. doi: 10.1017/jns.2012.28
12. Cole BF, Baron JA, Sandler RS, et al. Folic acid for the prevention of colorectal adenomas: a randomized clinical trial. *Jama* 2007;297(21):2351-9. doi: 10.1001/jama.297.21.2351 [published Online First: 2007/06/07]
13. Lawrence AK, Deng L, Rozen R. Methylene tetrahydrofolate reductase deficiency and low dietary folate reduce tumorigenesis in Apc min/+ mice. *Gut* 2009;58(6):805-11. doi: 10.1136/gut.2007.143107 [published Online First: 2009/01/29]
14. Lindzon GM, Medline A, Sohn KJ, et al. Effect of folic acid supplementation on the progression of colorectal aberrant crypt foci. *Carcinogenesis* 2009;30(9):1536-43. doi: 10.1093/carcin/bgp152 [published Online First: 2009/06/23]
15. Mason JB. Folate, cancer risk, and the Greek god, Proteus: a tale of two chameleons. *Nutrition reviews* 2009;67(4):206-12. doi: 10.1111/j.1753-4887.2009.00190.x [published Online First: 2009/04/02]
16. Ulrich CM, Miller JW. Folate and health: present and future. *Mol Nutr Food Res* 2013;57(4):561. doi: 10.1002/mnfr.201370034 [published Online First: 2013/04/05]
17. Choi JH, Yates Z, Martin C, et al. Gene-Nutrient Interaction between Folate and Dihydrofolate Reductase in Risk for Adenomatous Polyp Occurrence: A Preliminary Report. *J Nutr Sci Vitaminol (Tokyo)* 2015;61(6):455-9. doi: 10.3177/jnsv.61.455 [published Online First: 2016/02/16]
18. Sawaengsri H, Wang J, Reginaldo C, et al. High folic acid intake reduces natural killer cell cytotoxicity in aged mice. *J Nutr Biochem* 2016;30:102-7. doi: 10.1016/j.jnutbio.2015.12.006 [published Online First: 2016/03/26]



- 1  
2  
3 641 19. Ulrich CM, Gigic B, Bohm J, et al. The ColoCare Study: A Paradigm of Transdisciplinary Science  
4 642 in Colorectal Cancer Outcomes. *Cancer Epidemiol Biomarkers Prev* 2019;28(3):591-601. doi:  
5 643 10.1158/1055-9965.EPI-18-0773 [published Online First: 2018/12/14]  
6 644 20. Winkels RM, Heine-Broring RC, van Zutphen M, et al. The COLON study: Colorectal cancer:  
7 645 Longitudinal, Observational study on Nutritional and lifestyle factors that may influence  
8 646 colorectal tumour recurrence, survival and quality of life. *BMC cancer* 2014;14:374. doi:  
9 647 10.1186/1471-2407-14-374 [published Online First: 2014/06/03]  
10 648 21. van Roekel EH, Bours MJ, de Brouwer CP, et al. The applicability of the international  
11 649 classification of functioning, disability, and health to study lifestyle and quality of life of  
12 650 colorectal cancer survivors. *Cancer Epidemiol Biomarkers Prev* 2014;23(7):1394-405. doi:  
13 651 10.1158/1055-9965.EPI-13-1144 [published Online First: 2014/05/08]  
14 652 22. Fayers P, Bottomley A, Group EQoL, et al. Quality of life research within the EORTC-the  
15 653 EORTC QLQ-C30. European Organisation for Research and Treatment of Cancer. *European*  
16 654 *journal of cancer* 2002;38 Suppl 4:S125-33.  
17 655 23. Postma TJ, Aaronson NK, Heimans JJ, et al. The development of an EORTC quality of life  
18 656 questionnaire to assess chemotherapy-induced peripheral neuropathy: the QLQ-CIPN20.  
19 657 *European journal of cancer* 2005;41(8):1135-9. doi: 10.1016/j.ejca.2005.02.012  
20 658 24. Molloy AM, Scott JM. Microbiological assay for serum, plasma, and red cell folate using  
21 659 cryopreserved, microtiter plate method. *Methods Enzymol* 1997;281:43-53. [published Online  
22 660 First: 1997/01/01]  
23 661 25. Kelleher BP, Broin SD. Microbiological assay for vitamin B12 performed in 96-well microtitre  
24 662 plates. *J Clin Pathol* 1991;44(7):592-5. [published Online First: 1991/07/01]  
25 663 26. Hannisdal R, Ueland PM, Svardal A. Liquid chromatography-tandem mass spectrometry analysis  
26 664 of folate and folate catabolites in human serum. *Clin Chem* 2009;55(6):1147-54. doi:  
27 665 10.1373/clinchem.2008.114389 [published Online First: 2009/04/11]  
28 666 27. Midttun O, Hustad S, Ueland PM. Quantitative profiling of biomarkers related to B-vitamin status,  
29 667 tryptophan metabolism and inflammation in human plasma by liquid chromatography/tandem  
30 668 mass spectrometry. *Rapid Commun Mass Spectrom* 2009;23(9):1371-9. doi:  
31 669 10.1002/rcm.4013 [published Online First: 2009/04/02]  
32 670 28. Midttun O, Kvalheim G, Ueland PM. High-throughput, low-volume, multianalyte quantification of  
33 671 plasma metabolites related to one-carbon metabolism using HPLC-MS/MS. *Anal Bioanal*  
34 672 *Chem* 2013;405(6):2009-17. doi: 10.1007/s00216-012-6602-6 [published Online First:  
35 673 2012/12/13]  
36 674 29. Midttun O, McCann A, Aarseth O, et al. Combined Measurement of 6 Fat-Soluble Vitamins and  
37 675 26 Water-Soluble Functional Vitamin Markers and Amino Acids in 50 µL of Serum or  
38 676 Plasma by High-Throughput Mass Spectrometry. *Anal Chem* 2016;88(21):10427-36. doi:  
39 677 10.1021/acs.analchem.6b02325 [published Online First: 2016/11/02]  
40 678 30. Meyer K, Ueland PM. Targeted quantification of C-reactive protein and cystatin c and its variants  
41 679 by immuno-MALDI-MS. *Anal Chem* 2014;86(12):5807-14. doi: 10.1021/ac500704y  
42 680 [published Online First: 2014/05/23]  
43 681 31. Geijsen A, Ulvik A, Gigic B, et al. Circulating Folate and Folic Acid Concentrations: Associations  
44 682 With Colorectal Cancer Recurrence and Survival. *JNCI Cancer Spectr* 2020;4(5):pkaa051.  
45 683 doi: 10.1093/jncics/pkaa051 [published Online First: 2020/11/03]  
46 684 32. Kiblawi R, Holowatyj AN, Gigic B, et al. One-carbon metabolites, B-vitamins and associations  
47 685 with systemic inflammation and angiogenesis biomarkers among colorectal cancer patients:  
48 686 results from the ColoCare Study. *The British journal of nutrition* 2020:1-32. doi:  
49 687 10.1017/S0007114520000422 [published Online First: 2020/02/06]  
50 688 33. Koole JL, Bours MJL, Geijsen A, et al. Circulating B-vitamin biomarkers and B-vitamin  
51 689 supplement use in relation to quality of life in patients with colorectal cancer: results from the  
52 690 FOCUS consortium. *The American journal of clinical nutrition* 2021 doi:  
53 691 10.1093/ajcn/nqaa422 [published Online First: 2021/03/06]  
54 692 34. Schrotz-King P, Dölp K, Paskow MJ, et al. Dietary Supplement Use among German Colorectal  
55 693 Cancer Patients: the ColoCare Study: AACR/MEG Post-GWAS Horizons in Molecular  
56 694 Epidemiology: Digging Deeper into the Environment., 2012.  
57 695 35. Lao VV, Welsh P, Luo Y, et al. Altered RECQ Helicase Expression in Sporadic Primary  
58 696 Colorectal Cancers. *Transl Oncol* 2013;6(4):458-69.

- 1  
2  
3 697 36. Luo Y, Kaz AM, Kannngurn S, et al. NTRK3 is a potential tumor suppressor gene commonly  
4 698 inactivated by epigenetic mechanisms in colorectal cancer. *PLoS Genet* 2013;9(7):e1003552.  
5 699 doi: 10.1371/journal.pgen.1003552  
6 700 37. Luo Y, Tsuchiya KD, Il Park D, et al. RET is a potential tumor suppressor gene in colorectal  
7 701 cancer. *Oncogene* 2013;32(16):2037-47. doi: 10.1038/onc.2012.225  
8 702 38. Sherwood AM, Emerson RO, Scherer D, et al. Tumor-infiltrating lymphocytes in colorectal  
9 703 tumors display a diversity of T cell receptor sequences that differ from the T cells in adjacent  
10 704 mucosal tissue. *Cancer Immunol Immunother* 2013;62(9):1453-61. doi: 10.1007/s00262-013-  
11 705 1446-2  
12 706 39. Skender S, Bohm J, Schrotz-King P, et al. Plasma 25-Hydroxyvitamin D3 Levels in Colorectal  
13 707 Cancer Patients and Associations with Physical Activity. *Nutrition and cancer*  
14 708 2017;69(2):229-37. doi: 10.1080/01635581.2017.1265131  
15 709 40. Luo Y, Wong CJ, Kaz AM, et al. Differences in DNA methylation signatures reveal multiple  
16 710 pathways of progression from adenoma to colorectal cancer. *Gastroenterology*  
17 711 2014;147(2):418-29 e8. doi: 10.1053/j.gastro.2014.04.039  
18 712 41. Barrow TM, Klett H, Toth R, et al. Smoking is associated with hypermethylation of the APC 1A  
19 713 promoter in colorectal cancer: the ColoCare Study. *J Pathol* 2017;243(3):366-75. doi:  
20 714 10.1002/path.4955 [published Online First: 2017/08/10]  
21 715 42. Yu M, Carter KT, Makar KW, et al. MethyLight droplet digital PCR for detection and absolute  
22 716 quantification of infrequently methylated alleles. *Epigenetics* 2015;10(9):803-9. doi:  
23 717 10.1080/15592294.2015.1068490  
24 718 43. Klett H, Balavarca Y, Toth R, et al. Robust prediction of gene regulation in colorectal cancer  
25 719 tissues from DNA methylation profiles. *Epigenetics* 2018;13(4):386-97. doi:  
26 720 10.1080/15592294.2018.1460034 [published Online First: 2018/04/27]  
27 721 44. Ristau J, Staffa J, Schrotz-King P, et al. Suitability of circulating miRNAs as potential prognostic  
28 722 markers in colorectal cancer. *Cancer Epidemiol Biomarkers Prev* 2014;23(12):2632-7. doi:  
29 723 10.1158/1055-9965.EPI-14-0556  
30 724 45. Yuan Z, Baker K, Redman MW, et al. Dynamic plasma microRNAs are biomarkers for prognosis  
31 725 and early detection of recurrence in colorectal cancer. *British journal of cancer*  
32 726 2017;117(8):1202-10. doi: 10.1038/bjc.2017.266 [published Online First: 2017/08/16]  
33 727 46. Zeller G, Tap J, Voigt AY, et al. Potential of fecal microbiota for early-stage detection of  
34 728 colorectal cancer. *Mol Syst Biol* 2014;10:766. doi: 10.15252/msb.20145645  
35 729 47. Thomas AM, Manghi P, Asnicar F, et al. Metagenomic analysis of colorectal cancer datasets  
36 730 identifies cross-cohort microbial diagnostic signatures and a link with choline degradation.  
37 731 *Nat Med* 2019;25(4):667-78. doi: 10.1038/s41591-019-0405-7 [published Online First:  
38 732 2019/04/03]  
39 733 48. Wirbel J, Pyl PT, Kartal E, et al. Meta-analysis of fecal metagenomes reveals global microbial  
40 734 signatures that are specific for colorectal cancer. *Nat Med* 2019;25(4):679-89. doi:  
41 735 10.1038/s41591-019-0406-6 [published Online First: 2019/04/03]  
42 736 49. Liesenfeld DB, Grapov D, Fahrman JF, et al. Metabolomics and transcriptomics identify pathway  
43 737 differences between visceral and subcutaneous adipose tissue in colorectal cancer patients: the  
44 738 ColoCare study. *The American journal of clinical nutrition* 2015;102(2):433-43. doi:  
45 739 10.3945/ajcn.114.103804  
46 740 50. Liesenfeld DB, Habermann N, Toth R, et al. Changes in urinary metabolic profiles of colorectal  
47 741 cancer patients enrolled in a prospective cohort study (ColoCare). *Metabolomics*  
48 742 2015;11(4):998-1012. doi: 10.1007/s11306-014-0758-3 [published Online First: 2015/08/01]  
49 743 51. Ose J, Gigic B, Lin T, et al. Multiplatform Urinary Metabolomics Profiling to Discriminate  
50 744 Cachectic from Non-Cachectic Colorectal Cancer Patients: Pilot Results from the ColoCare  
51 745 Study. *Metabolites* 2019;9(9) doi: 10.3390/metabo9090178 [published Online First:  
52 746 2019/09/11]  
53 747 52. Bohm J, Pianka F, Stuttgen N, et al. Discovery of novel plasma proteins as biomarkers for the  
54 748 development of incisional hernias after midline incision in patients with colorectal cancer: The  
55 749 ColoCare study. *Surgery* 2017;161(3):808-17. doi: 10.1016/j.surg.2016.08.025  
56 750 53. Gong J, Hutter CM, Newcomb PA, et al. Genome-Wide Interaction Analyses between Genetic  
57 751 Variants and Alcohol Consumption and Smoking for Risk of Colorectal Cancer. *PLoS Genet*

1

2

3 752 2016;12(10):e1006296. doi: 10.1371/journal.pgen.1006296 [published Online First:  
4 753 2016/10/11]

5 754 54. Delphan M, Lin T, Liesenfeld DB, et al. Associations of branched-chain amino acids with  
6 755 parameters of energy balance and survival in colorectal cancer patients: Results from the  
7 756 ColoCare Study. *Metabolomics* 2018;2018(14) doi: 10.1007/s11306-017-1314-8 [published  
8 757 Online First: 2018/05/01]

9 758 55. Rosenthal EA, Shirts BH, Amendola LM, et al. Rare loss of function variants in candidate genes  
10 759 and risk of colorectal cancer. *Hum Genet* 2018 doi: 10.1007/s00439-018-1938-4 [published  
11 760 Online First: 2018/09/30]

12 761 56. Nattenmueller J, Hoegenauer H, Boehm J, et al. CT-based compartmental quantification of adipose  
13 762 tissue versus body metrics in colorectal cancer patients. *Eur Radiol* 2016;26(11):4131-40. doi:  
14 763 10.1007/s00330-016-4231-8

15 764 57. Ozoya OO, Siegel EM, Srikumar T, et al. Quantitative Assessment of Visceral Obesity and  
16 765 Postoperative Colon Cancer Outcomes. *J Gastrointest Surg* 2017;21(3):534-42. doi:  
17 766 10.1007/s11605-017-3362-9 [published Online First: 2017/01/20]

18 767 58. van Zutphen M, Geelen A, Boshuizen HC, et al. Pre-to-post diagnosis weight trajectories in  
19 768 colorectal cancer patients with non-metastatic disease. *Supportive care in cancer : official  
20 769 journal of the Multinational Association of Supportive Care in Cancer* 2019;27(4):1541-49.  
21 770 doi: 10.1007/s00520-018-4560-z [published Online First: 2018/11/30]

22 771 59. van Zutphen M, Boshuizen HC, Kok DE, et al. Colorectal cancer survivors only marginally change  
23 772 their overall lifestyle in the first 2 years following diagnosis. *J Cancer Surviv* 2019;13(6):956-  
24 773 67. doi: 10.1007/s11764-019-00812-7 [published Online First: 2019/10/28]

25 774 60. Wesselink E, Bours MJL, de Wilt JHW, et al. Chemotherapy and vitamin D supplement use are  
26 775 determinants of serum 25-hydroxyvitamin D levels during the first six months after colorectal  
27 776 cancer diagnosis. *J Steroid Biochem Mol Biol* 2020;199:105577. doi:  
28 777 10.1016/j.jsbmb.2020.105577 [published Online First: 2020/01/10]

29 778 61. Wesselink E, Kok DE, de Wilt JHW, et al. Sufficient 25-Hydroxyvitamin D Levels 2 Years after  
30 779 Colorectal Cancer Diagnosis are Associated with a Lower Risk of All-cause Mortality. *Cancer  
31 780 Epidemiol Biomarkers Prev* 2021;30(4):765-73. doi: 10.1158/1055-9965.EPI-20-1388  
32 781 [published Online First: 2021/02/04]

33 782 62. Wesselink E, Balvers M, Bours MJL, et al. The association between circulating levels of vitamin  
34 783 D and inflammatory markers in the first 2 years after colorectal cancer diagnosis. *Therap Adv  
35 784 Gastroenterol* 2020;13:1756284820923922. doi: 10.1177/1756284820923922 [published  
36 785 Online First: 2020/06/18]

37 786 63. Wesselink E, Kok DE, Bours MJL, et al. Vitamin D, magnesium, calcium, and their interaction in  
38 787 relation to colorectal cancer recurrence and all-cause mortality. *The American journal of  
39 788 clinical nutrition* 2020;111(5):1007-17. doi: 10.1093/ajcn/nqaa049 [published Online First:  
40 789 2020/03/20]

41 790 64. van Zutphen M, Winkels RM, van Duijnhoven FJ, et al. An increase in physical activity after  
42 791 colorectal cancer surgery is associated with improved recovery of physical functioning: a  
43 792 prospective cohort study. *BMC cancer* 2017;17(1):74. doi: 10.1186/s12885-017-3066-2  
44 793 [published Online First: 2017/01/27]

45 794 65. Wesselink E, van Baar H, van Zutphen M, et al. Inflammation Is a Mediating Factor in the  
46 795 Association between Lifestyle and Fatigue in Colorectal Cancer Patients. *Cancers (Basel)*  
47 796 2020;12(12) doi: 10.3390/cancers12123701 [published Online First: 2020/12/16]

48 797 66. Wesselink E, Staritsky LE, van Zutphen M, et al. The association between the adapted dietary  
49 798 inflammatory index and colorectal cancer recurrence and all-cause mortality. *Clin Nutr*  
50 799 2021;40(6):4436-43. doi: 10.1016/j.clnu.2021.01.004 [published Online First: 2021/01/23]

51 800 67. van Baar H, Winkels RM, Brouwer JGM, et al. Associations of Abdominal Skeletal Muscle Mass,  
52 801 Fat Mass, and Mortality among Men and Women with Stage I-III Colorectal Cancer. *Cancer  
53 802 Epidemiol Biomarkers Prev* 2020;29(5):956-65. doi: 10.1158/1055-9965.EPI-19-1134  
54 803 [published Online First: 2020/03/07]

55 804 68. van Baar H, Beijer S, Bours MJL, et al. Low radiographic muscle density is associated with lower  
56 805 overall and disease-free survival in early-stage colorectal cancer patients. *J Cancer Res Clin  
57 806 Oncol* 2018;144(11):2139-47. doi: 10.1007/s00432-018-2736-z [published Online First:  
58 807 2018/08/19]

- 1  
2  
3 808 69. van Baar H, Bours MJL, Beijer S, et al. Body composition and its association with fatigue in the  
4 809 first 2 years after colorectal cancer diagnosis. *J Cancer Surviv* 2021;15(4):597-606. doi:  
5 810 10.1007/s11764-020-00953-0 [published Online First: 2020/10/18]  
6 811 70. Winkels RM, van Brakel L, van Baar H, et al. Are Ergothioneine Levels in Blood Associated with  
7 812 Chronic Peripheral Neuropathy in Colorectal Cancer Patients Who Underwent Chemotherapy?  
8 813 *Nutrition and cancer* 2020;72(3):451-59. doi: 10.1080/01635581.2019.1637005 [published  
9 814 Online First: 2019/07/13]  
10 815 71. Wesselink E, Winkels RM, van Baar H, et al. Dietary Intake of Magnesium or Calcium and  
11 816 Chemotherapy-Induced Peripheral Neuropathy in Colorectal Cancer Patients. *Nutrients*  
12 817 2018;10(4) doi: 10.3390/nu10040398 [published Online First: 2018/03/24]  
13 818 72. Postma EM, Kok DE, de Graaf C, et al. Chemosensory perception and food preferences in  
14 819 colorectal cancer patients undergoing adjuvant chemotherapy. *Clin Nutr ESPEN* 2020;40:242-  
15 820 51. doi: 10.1016/j.clnesp.2020.09.012 [published Online First: 2020/11/14]  
16 821 73. Hofer P, Hagmann M, Brezina S, et al. Bayesian and frequentist analysis of an Austrian genome-  
17 822 wide association study of colorectal cancer and advanced adenomas. *Oncotarget*  
18 823 2017;8(58):98623-34. doi: 10.18632/oncotarget.21697 [published Online First: 2017/12/13]  
19 824 74. Schmit SL, Edlund CK, Schumacher FR, et al. Novel Common Genetic Susceptibility Loci for  
20 825 Colorectal Cancer. *Journal of the National Cancer Institute* 2019;111(2):146-57. doi:  
21 826 10.1093/jnci/djy099 [published Online First: 2018/06/20]  
22 827 75. Schafmayer C, Harrison JW, Buch S, et al. Genome-wide association analysis of diverticular  
23 828 disease points towards neuromuscular, connective tissue and epithelial pathomechanisms. *Gut*  
24 829 2019 doi: 10.1136/gutjnl-2018-317619 [published Online First: 2019/01/21]  
25 830 76. Zochmeister C, Brezina S, Hofer P, et al. Leukocyte telomere length throughout the continuum of  
26 831 colorectal carcinogenesis. *Oncotarget* 2018;9(17):13582-92. doi: 10.18632/oncotarget.24431  
27 832 [published Online First: 2018/03/24]  
28 833 77. Jiraskova K, Hughes DJ, Brezina S, et al. Functional Polymorphisms in DNA Repair Genes Are  
29 834 Associated with Sporadic Colorectal Cancer Susceptibility and Clinical Outcome. *Int J Mol*  
30 835 *Sci* 2018;20(1) doi: 10.3390/ijms20010097 [published Online First: 2018/12/29]  
31 836 78. Luna Coronell JA, Sergelen K, Hofer P, et al. The Immunome of Colon Cancer: Functional In  
32 837 Silico Analysis of Antigenic Proteins Deduced from IgG Microarray Profiling. *Genomics*  
33 838 *Proteomics Bioinformatics* 2018;16(1):73-84. doi: 10.1016/j.gpb.2017.10.002 [published  
34 839 Online First: 2018/03/06]  
35 840 79. Geijssen A, van Roekel EH, van Duijnhoven FJB, et al. Plasma metabolites associated with  
36 841 colorectal cancer stage: Findings from an international consortium. *International journal of*  
37 842 *cancer Journal international du cancer* 2019 doi: 10.1002/ijc.32666 [published Online First:  
38 843 2019/09/10]  
39 844 80. Van Roekel EH, Bours MJ, Breedveld-Peters JJ, et al. Light Physical Activity Is Associated with  
40 845 Quality of Life after Colorectal Cancer. *Med Sci Sports Exerc* 2015;47(12):2493-503. doi:  
41 846 10.1249/MSS.0000000000000698 [published Online First: 2015/05/15]  
42 847 81. van Roekel EH, Winkler EA, Bours MJ, et al. Associations of sedentary time and patterns of  
43 848 sedentary time accumulation with health-related quality of life in colorectal cancer survivors.  
44 849 *Prev Med Rep* 2016;4:262-9. doi: 10.1016/j.pmedr.2016.06.022 [published Online First:  
45 850 2016/07/16]  
46 851 82. van Roekel EH, Bours MJ, Breedveld-Peters JJ, et al. Modeling how substitution of sedentary  
47 852 behavior with standing or physical activity is associated with health-related quality of life in  
48 853 colorectal cancer survivors. *Cancer causes & control : CCC* 2016;27(4):513-25. doi:  
49 854 10.1007/s10552-016-0725-6 [published Online First: 2016/02/20]  
50 855 83. van Roekel EH, Duchateau J, Bours MJL, et al. Longitudinal associations of light-intensity  
51 856 physical activity with quality of life, functioning and fatigue after colorectal cancer. *Quality of*  
52 857 *life research : an international journal of quality of life aspects of treatment, care and*  
53 858 *rehabilitation* 2020;29(11):2987-98. doi: 10.1007/s11136-020-02566-7 [published Online  
54 859 First: 2020/07/04]  
55 860 84. Breedveld-Peters JJJ, Koole JL, Muller-Schulte E, et al. Colorectal cancers survivors' adherence to  
56 861 lifestyle recommendations and cross-sectional associations with health-related quality of life.  
57 862 *The British journal of nutrition* 2018;120(2):188-97. doi: 10.1017/S0007114518000661  
58 863 [published Online First: 2018/04/17]

- 1  
2  
3 864 85. van Roekel EH, Bours MJL, Te Molder MEM, et al. Associations of adipose and muscle tissue  
4 865 parameters at colorectal cancer diagnosis with long-term health-related quality of life. *Quality*  
5 866 *of life research : an international journal of quality of life aspects of treatment, care and*  
6 867 *rehabilitation* 2017;26(7):1745-59. doi: 10.1007/s11136-017-1539-z [published Online First:  
7 868 2017/03/21]
- 8 869 86. van Heinsbergen M, Konsten JL, Bours MJL, et al. Preoperative handgrip strength is not  
9 870 associated with complications and health-related quality of life after surgery for colorectal  
10 871 cancer. *Sci Rep* 2020;10(1):13005. doi: 10.1038/s41598-020-69806-1 [published Online First:  
11 872 2020/08/05]
- 12 873 87. Koole JL, Bours MJL, Breedveld-Peters JJL, et al. Is dietary supplement use longitudinally  
13 874 associated with fatigue in stage I-III colorectal cancer survivors? *Clin Nutr* 2019 doi:  
14 875 10.1016/j.clnu.2018.12.037 [published Online First: 2019/02/17]
- 15 876 88. Breedveld-Peters JJL, Bours MJL, Cords CI, et al. The impact of participation restrictions on  
16 877 everyday life in long-term colorectal cancer survivors in the EnCoRe study: A mixed-method  
17 878 study. *Eur J Oncol Nurs* 2020;45:101724. doi: 10.1016/j.ejon.2020.101724 [published Online  
18 879 First: 2020/02/12]
- 19 880 89. Koole JL, Bours MJL, Breedveld-Peters JJL, et al. Evaluating the Validity of a Food Frequency  
20 881 Questionnaire in Comparison with a 7-Day Dietary Record for Measuring Dietary Intake in a  
21 882 Population of Survivors of Colorectal Cancer. *J Acad Nutr Diet* 2020;120(2):245-57. doi:  
22 883 10.1016/j.jand.2019.09.008 [published Online First: 2019/12/07]
- 23 884 90. Revesz D, van Kuijk SMJ, Mols F, et al. Development and internal validation of prediction models  
24 885 for colorectal cancer survivors to estimate the 1-year risk of low health-related quality of life  
25 886 in multiple domains. *BMC Med Inform Decis Mak* 2020;20(1):54. doi: 10.1186/s12911-020-  
26 887 1064-9 [published Online First: 2020/03/14]
- 27 888 91. Ose J, Botma A, Balavarca Y, et al. Pathway analysis of genetic variants in folate-mediated one-  
28 889 carbon metabolism-related genes and survival in a prospectively followed cohort of colorectal  
29 890 cancer patients. *Cancer Med* 2018 doi: 10.1002/cam4.1407 [published Online First:  
30 891 2018/05/31]

892

1  
2  
3 893 **Figure legends**  
4

5 894 **Figure 1** FOCUS Consortium design  
6  
7  
8  
9  
10  
11  
12  
13  
14  
15  
16  
17  
18  
19  
20  
21  
22  
23  
24  
25  
26  
27  
28  
29  
30  
31  
32  
33  
34  
35  
36  
37  
38  
39  
40  
41  
42  
43  
44  
45  
46  
47  
48  
49  
50  
51  
52  
53  
54  
55  
56  
57  
58  
59  
60

For peer review only

1  
2  
3  
4  
5  
6  
7  
8  
9  
10  
11  
12  
13  
14  
15  
16  
17  
18  
19  
20  
21  
22  
23  
24  
25  
26  
27  
28  
29  
30  
31  
32  
33  
34  
35  
36  
37  
38  
39  
40  
41  
42  
43  
44  
45  
46  
47  
48  
49  
50  
51  
52  
53  
54  
55  
56

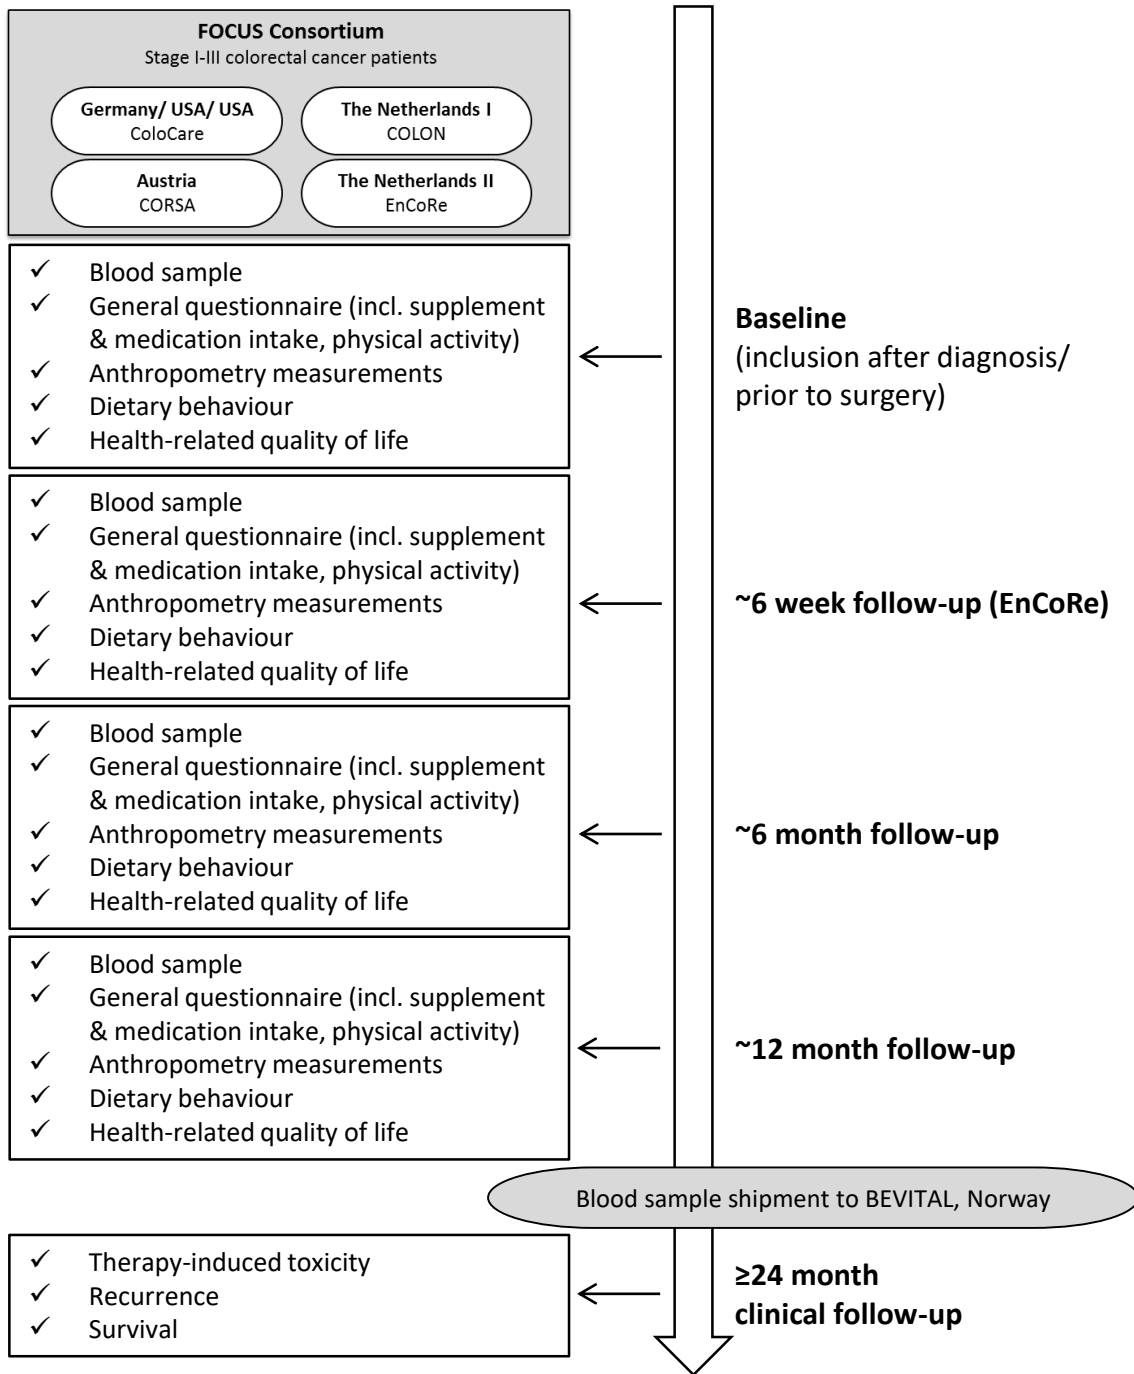

# BMJ Open

**Cohort profile: Biomarkers related to folate-dependent one-carbon metabolism in colorectal cancer recurrence and survival:  
The FOCUS Consortium**

|                               |                                                                                                                                                                                                                                                                                                                                                                                                                                                                                                                                                                                                                                                                                                                                                                                                                                                                                                                                                                                                                                                                                                                                                                                                                                                                                                                                                                                                                                                                                                                                                                                                                                                                                                                                                                                                                                                                                                                                                                                                                                                                                                                                                            |
|-------------------------------|------------------------------------------------------------------------------------------------------------------------------------------------------------------------------------------------------------------------------------------------------------------------------------------------------------------------------------------------------------------------------------------------------------------------------------------------------------------------------------------------------------------------------------------------------------------------------------------------------------------------------------------------------------------------------------------------------------------------------------------------------------------------------------------------------------------------------------------------------------------------------------------------------------------------------------------------------------------------------------------------------------------------------------------------------------------------------------------------------------------------------------------------------------------------------------------------------------------------------------------------------------------------------------------------------------------------------------------------------------------------------------------------------------------------------------------------------------------------------------------------------------------------------------------------------------------------------------------------------------------------------------------------------------------------------------------------------------------------------------------------------------------------------------------------------------------------------------------------------------------------------------------------------------------------------------------------------------------------------------------------------------------------------------------------------------------------------------------------------------------------------------------------------------|
| Journal:                      | <i>BMJ Open</i>                                                                                                                                                                                                                                                                                                                                                                                                                                                                                                                                                                                                                                                                                                                                                                                                                                                                                                                                                                                                                                                                                                                                                                                                                                                                                                                                                                                                                                                                                                                                                                                                                                                                                                                                                                                                                                                                                                                                                                                                                                                                                                                                            |
| Manuscript ID                 | bmjopen-2022-062930.R1                                                                                                                                                                                                                                                                                                                                                                                                                                                                                                                                                                                                                                                                                                                                                                                                                                                                                                                                                                                                                                                                                                                                                                                                                                                                                                                                                                                                                                                                                                                                                                                                                                                                                                                                                                                                                                                                                                                                                                                                                                                                                                                                     |
| Article Type:                 | Cohort profile                                                                                                                                                                                                                                                                                                                                                                                                                                                                                                                                                                                                                                                                                                                                                                                                                                                                                                                                                                                                                                                                                                                                                                                                                                                                                                                                                                                                                                                                                                                                                                                                                                                                                                                                                                                                                                                                                                                                                                                                                                                                                                                                             |
| Date Submitted by the Author: | 07-Sep-2022                                                                                                                                                                                                                                                                                                                                                                                                                                                                                                                                                                                                                                                                                                                                                                                                                                                                                                                                                                                                                                                                                                                                                                                                                                                                                                                                                                                                                                                                                                                                                                                                                                                                                                                                                                                                                                                                                                                                                                                                                                                                                                                                                |
| Complete List of Authors:     | <p>Gigic, Biljana; University Hospital Heidelberg, Department of General, Visceral and Transplantation Surgery<br/> van Roekel, Eline ; Maastricht University, Department of Epidemiology<br/> Holowatyj, Andreana; Vanderbilt University Medical Center, Medicine; Vanderbilt-Ingram Cancer Center,<br/> Brezina, Stefanie; Medical University of Vienna, Institute of Cancer Research, Department of Medicine I<br/> Geijsen, Anne; Wageningen University &amp; Research, Division of Human Nutrition and Health<br/> Ulvik, Arve; BEVITAL<br/> Ose, Jennifer; Huntsman Cancer Institute; University of Utah, Department of Population Health Sciences<br/> Koole, Janna L.; Maastricht University, Department of Epidemiology<br/> Damerell, Victoria; University Hospital Heidelberg, Department of General, Visceral and Transplantation Surgery<br/> Kiblawi, Rama; Huntsman Cancer Institute; University of Utah, Department of Population Health Sciences<br/> Gumpenberger, Tanja; Medical University of Vienna, Institute of Cancer Research, Department of Medicine I<br/> Lin, Tengda; Huntsman Cancer Institute; University of Utah, Department of Population Health Sciences<br/> Kvalheim, Gry; BEVITAL<br/> Koelsch, Torsten; Heidelberg University Hospital, Department of General, Visceral and Transplantation Surgery<br/> Kok, Dieuwertje; Wageningen University &amp; Research, Division of Human Nutrition and Health<br/> van Duijnhoven, Franzel J; Wageningen University &amp; Research, Division of Human Nutrition and Health<br/> Bours, Martijn J.; Maastricht University, Department of Epidemiology<br/> Baierl, Andreas; University of Vienna, Department of Statistics and Operations Research<br/> Li, Christopher I.; Fred Hutchinson Cancer Research Center<br/> Grady, William; Fred Hutchinson Cancer Research Center; University of Washington School of Medicine, Department of Medicine<br/> Vickers, Kathy; Fred Hutchinson Cancer Research Center<br/> Habermann, Nina; European Molecular Biology Laboratory (EMBL), Genome Biology<br/> Schneider, Martin; Heidelberg University Hospital, Department of</p> |



|                                                    |                                                                                                                                                                                                                                                                                                                                                                                                                                                                                                                                                                                                                                                                                  |
|----------------------------------------------------|----------------------------------------------------------------------------------------------------------------------------------------------------------------------------------------------------------------------------------------------------------------------------------------------------------------------------------------------------------------------------------------------------------------------------------------------------------------------------------------------------------------------------------------------------------------------------------------------------------------------------------------------------------------------------------|
|                                                    | General, Visceral and Transplantation Surgery<br>Kampman, Ellen; Wageningen University & Research, Division of Human Nutrition and Health<br>Ueland, Per Magne; BEVITAL<br>Ulrich, Alexis; Städtische Kliniken Neuss, Lukaskrankenhaus GmbH, Surgical Department I; University Hospital Heidelberg, Department of General, Visceral and Transplantation Surgery<br>Weijenberg, Matty ; Maastricht University, Department of Epidemiology<br>Gsur, Andrea; Medical University of Vienna, Institute of Cancer Research, Department of Medicine I<br>Ulrich, Cornelia; Huntsman Cancer Institute, Population Sciences; University of Utah, Department of Population Health Sciences |
| <b>&lt;b&gt;Primary Subject Heading&lt;/b&gt;:</b> | Epidemiology                                                                                                                                                                                                                                                                                                                                                                                                                                                                                                                                                                                                                                                                     |
| Secondary Subject Heading:                         | Nutrition and metabolism, Oncology, Public health                                                                                                                                                                                                                                                                                                                                                                                                                                                                                                                                                                                                                                |
| Keywords:                                          | Epidemiology < ONCOLOGY, Nutritional support < ONCOLOGY, Gastrointestinal tumours < ONCOLOGY                                                                                                                                                                                                                                                                                                                                                                                                                                                                                                                                                                                     |
|                                                    |                                                                                                                                                                                                                                                                                                                                                                                                                                                                                                                                                                                                                                                                                  |

SCHOLARONE™  
Manuscripts



I, the Submitting Author has the right to grant and does grant on behalf of all authors of the Work (as defined in the below author licence), an exclusive licence and/or a non-exclusive licence for contributions from authors who are: i) UK Crown employees; ii) where BMJ has agreed a CC-BY licence shall apply, and/or iii) in accordance with the terms applicable for US Federal Government officers or employees acting as part of their official duties; on a worldwide, perpetual, irrevocable, royalty-free basis to BMJ Publishing Group Ltd ("BMJ") its licensees and where the relevant Journal is co-owned by BMJ to the co-owners of the Journal, to publish the Work in this journal and any other BMJ products and to exploit all rights, as set out in our [licence](#).

The Submitting Author accepts and understands that any supply made under these terms is made by BMJ to the Submitting Author unless you are acting as an employee on behalf of your employer or a postgraduate student of an affiliated institution which is paying any applicable article publishing charge ("APC") for Open Access articles. Where the Submitting Author wishes to make the Work available on an Open Access basis (and intends to pay the relevant APC), the terms of reuse of such Open Access shall be governed by a Creative Commons licence – details of these licences and which [Creative Commons](#) licence will apply to this Work are set out in our licence referred to above.

Other than as permitted in any relevant BMJ Author's Self Archiving Policies, I confirm this Work has not been accepted for publication elsewhere, is not being considered for publication elsewhere and does not duplicate material already published. I confirm all authors consent to publication of this Work and authorise the granting of this licence.

1  
2  
3  
4  
5  
6  
7  
8  
9  
10  
11  
12  
13  
14  
15  
16  
17  
18  
19  
20  
21  
22  
23  
24  
25  
26  
27  
28  
29  
30  
31  
32  
33  
34  
35  
36  
37  
38  
39  
40  
41  
42  
43  
44  
45  
46  
47  
48  
49  
50  
51  
52  
53  
54  
55  
56  
57  
58  
59  
60

## Cohort profile: Biomarkers related to folate-dependent one-carbon metabolism in colorectal cancer recurrence and survival: The FOCUS Consortium

### Authors:

Biljana Gigic<sup>1</sup>, Eline H. van Roekel<sup>2</sup>, Andreana N. Holowatyj<sup>3,4,5,6</sup>, Stefanie Brezina<sup>7</sup>, Anne J.M.R. Geijssen<sup>8</sup>, Arve Ulvik<sup>9</sup>, Jennifer Ose<sup>3,4</sup>, Janna L. Koole<sup>2</sup>, Victoria Damerell<sup>1</sup>, Rama Kiblawi<sup>3,4</sup>, Tanja Gumpenberger<sup>7</sup>, Tengda Lin<sup>3,4</sup>, Gry Kvalheim<sup>9</sup>, Torsten Koelsch<sup>1</sup>, Dieuwertje E. Kok<sup>8</sup>, Fränzel J.B. van Duijnhoven<sup>8</sup>, Martijn J. L. Bours<sup>2</sup>, Andreas Baierl<sup>10</sup>, Christopher I. Li<sup>11</sup>, William M. Grady<sup>11,12,13</sup>, Kathy Vickers<sup>11</sup>, Nina Habermann<sup>14</sup>, Martin Schneider<sup>1</sup>, Ellen Kampman<sup>8,16</sup>, Per-Magne Ueland<sup>9,16</sup>, Alexis B. Ulrich<sup>1,15,16</sup>, Matty Weijenberg<sup>2,16</sup>, Andrea Gsur<sup>7,16,17</sup> and Cornelia M. Ulrich<sup>3,4,16,17</sup>

### Affiliations:

<sup>1</sup> Department of General, Visceral and Transplantation Surgery, Heidelberg University Hospital, Heidelberg, Germany

<sup>2</sup> Department of Epidemiology, Maastricht University, Maastricht, the Netherlands

<sup>3</sup> Huntsman Cancer Institute, Salt Lake City, UT

<sup>4</sup> Department of Population Health Sciences, University of Utah, Salt Lake City, UT

<sup>5</sup> Department of Medicine, Vanderbilt University Medical Center, Nashville, TN

<sup>6</sup> Vanderbilt-Ingram Cancer Center, Nashville, TN

<sup>7</sup> Institute of Cancer Research, Department of Medicine I, Medical University of Vienna, Austria

<sup>8</sup> Division of Human Nutrition and Health, Wageningen University & Research, Wageningen, The Netherlands

<sup>9</sup> BEVITAL, Bergen, Norway

<sup>10</sup> Department of Statistics and Operations Research, University of Vienna, Austria

<sup>11</sup> Public Health Sciences Division, Fred Hutchinson Cancer Research Center, Seattle, Washington

<sup>12</sup> Department of Medicine, University of Washington School of Medicine, Seattle, Washington

<sup>13</sup> Clinical Research Division, Fred Hutchinson Cancer Research Center, Seattle, Washington

<sup>14</sup> Genome Biology, European Molecular Biology Laboratory (EMBL), Heidelberg, Germany

<sup>15</sup> Department of Surgery I, Lukas Hospital Neuss, Neuss, Germany

<sup>16</sup> These authors contributed equally

<sup>17</sup> Corresponding authors

**Keywords:** cohort, consortium, B-vitamins, folate, folic acid, one-carbon metabolism, dietary supplements, biomarkers, treatment toxicity, colorectal cancer, recurrence, survival

### Corresponding author:

Cornelia M. Ulrich, MS, PhD

Chief Scientific Officer and Executive Director of the Cancer Center

Huntsman Cancer Institute

2000 Circle of Hope Drive

Salt Lake City, UT 84112

Phone: +1 (801) 213-5716

Email: neli.ulrich@hci.utah.edu

## 46 Abstract

47 **Purpose:** The overarching goal of the FOCUS (Biomarkers related to folate-dependent one-  
48 carbon metabolism in colorectal cancer recurrence and survival) Consortium is to unravel the  
49 effect of folate and folate-mediated one-carbon metabolism (FOCM) biomarkers on colorectal  
50 cancer (CRC) prognosis to provide clinically relevant advice on folate intake to cancer  
51 patients and define future tertiary prevention strategies.

52 **Participants:** The FOCUS Consortium is an international, prospective cohort of 2,401  
53 women and men above 18 years of age who were diagnosed with a primary invasive non-  
54 metastatic (stage I-III) CRC. The Consortium comprises patients from Austria, two sites from  
55 the Netherlands, Germany and two sites from the USA. Patients are recruited after CRC  
56 diagnosis and followed at six and twelve months after enrolment. At each time point,  
57 sociodemographic data, data on health behavior, and clinical data are collected, blood samples  
58 are drawn.

59 **Findings to date:** An increased risk of cancer recurrences was observed among patients with  
60 higher compared to lower circulating folic acid concentrations. Furthermore, specific folate  
61 species within the FOCM pathway were associated with both inflammation and angiogenesis  
62 pathways among CRC patients. In addition, higher vitamin B<sub>6</sub> status was associated with  
63 better quality of life at six months post treatment.

64 **Future plans:** Better insights into the research on associations between folate and FOCM  
65 biomarkers and clinical outcomes in CRC patients will facilitate the development of  
66 guidelines regarding folate intake in order to provide clinically relevant advice to cancer  
67 patients, health professionals involved in patient care, and ultimately further tertiary  
68 prevention strategies in the future. The FOCUS Consortium offers an excellent infrastructure  
69 for short- and long-term research projects and for combining additional biomarkers and data  
70 resulting from the individual cohorts within the next years, e.g. microbiome data, omics- and  
71 multi-omics data or CT-quantified body composition data.

## 72 Strengths and limitations of this study

- 73 • FOCUS is the largest consortium to date addressing the research question of folate and  
74 FOCM biomarkers in relation to survival, recurrence, treatment toxicity, and health-  
75 related quality of life outcomes in CRC patients
- 76 • The cohorts included in the FOCUS Consortium are designed to enable future pooling  
77 of data using harmonized and standardized methods to collect data and biospecimens
- 78 • The pooled sample size provides sufficient power to investigate subgroup analyses  
79 across CRC patients
- 80 • Study time point definitions differ between some of the cohorts and have to be adapted  
81 for specific projects
- 82 • A selection bias for follow-up can arise because it is possible that patients who  
83 experience more severe toxicities, worse clinical outcome or health-related quality of  
84 life are underrepresented among those completing follow-ups

## 86 Introduction

87 Among men and women world-wide, colorectal cancer (CRC) accounts for nearly 10% of all  
88 incident cancer cases.<sup>1</sup> In Europe, 5-year survival for CRC patients is approximately 55%,  
89 with substantial differences by stage.<sup>2,3</sup> The number of CRC patients continues to increase due  
90 to implementation of improved screening strategies and/or enhanced treatment modalities.<sup>4</sup>  
91 Many cancer patients seek information on what they can do themselves to improve survival -  
92 for instance by improving their dietary habits and other lifestyle factors.<sup>5</sup> However, there may  
93 be behavioural aspects among individuals diagnosed with CRC, which may be harmful in  
94 some cases, such as the use of high-dose nutritional supplements containing synthetic folate.  
95 In general, knowledge on short and long-term effects is insufficient to make sound  
96 recommendations on use of dietary supplements, in particular folate, to cancer survivors, even  
97 though dietary supplements are used by 20%-85% of patients with cancer<sup>6-8</sup>, highlighting the  
98 importance of thorough evaluation of potential benefits and harms and to support  
99 development of evidence-based recommendations on use of dietary supplements to cancer  
100 patients.

101 Folic acid is the synthetic form of the B-vitamin folate and is often used in dietary  
102 supplements or fortified foods. However, there is broad agreement that food folate is less  
103 bioavailable than folic acid with a median relative bioavailability of 65% (range: 44–80%), an  
104 estimate that approximates the 60% value derived from the Dietary Folate Equivalents  
105 equation.<sup>9</sup> Folate and folic acid play an important role in one-carbon metabolism, which is a  
106 complex series of biochemical reactions essential in nucleotide synthesis, methylation  
107 reactions and amino acid homeostasis.<sup>10</sup> One-carbon metabolism refers to a complex network  
108 of biochemical reactions linked to nucleotide synthesis and provides methyl groups for DNA,  
109 RNA or protein methylation. Thus, one-carbon metabolism is directly controlling processes  
110 determining DNA synthesis and integrity, both processes known to be linked to tumor  
111 growth.<sup>11</sup> To what extent folic acid supplement use and biomarkers of folate-mediated one-  
112 carbon metabolism (FOCM) impact cancer survival and treatment efficacy and toxicity still  
113 needs to be clarified.<sup>11,12</sup> Folate and FOCM biomarker deficiencies may increase cancer risk,  
114 but high levels, especially of synthetic folic acid, may also be driving factors in  
115 carcinogenesis.<sup>6,13</sup> An increasing body of evidence suggests that folate plays a dual role in  
116 carcinogenesis, involving both the prevention of early lesions and potential harm once pre-  
117 neoplastic or neoplastic lesions have developed.<sup>6,12,14-20</sup>

1  
2  
3 118 The overarching goal of the FOCUS (biomarkers related to Folate-dependent one-  
4  
5 119 carbon metabolism in Colorectal cancer recurrence and Survival) Consortium is to study  
6  
7 120 associations between folate and FOCM biomarkers and recurrence and survival in CRC  
8  
9 121 patients. Better insights into these associations will facilitate the development of guidelines  
10  
11 122 regarding folate intake in order to provide clinically relevant advice to cancer patients, health  
12  
13 123 professionals involved in patient care, and ultimately further tertiary prevention strategies in  
14  
15 124 the future. The FOCUS Consortium is a large-scale international consortium with CRC  
16  
17 125 patients from six prospective cohort studies. The primary objectives of the FOCUS  
18  
19 126 Consortium are: (i) to determine possible associations of folate and other FOCM biomarkers  
20  
21 127 at diagnosis with recurrence or survival in non-metastatic (stage I-III) CRC; (ii) to elucidate  
22  
23 128 whether biomarkers related to FOCM are associated with dietary and supplemental intake of  
24  
25 129 these respective nutrients; (iii) to explore whether FOCM biomarkers are associated with  
26  
27 130 treatment toxicity in CRC patients undergoing chemotherapy; and (iv) to collect  
28  
29 131 comprehensive data of patient characteristics at baseline and follow-up including biomarkers  
30  
31 132 of FOCM to establish a unique resource for future scientific research. The FOCUS  
32  
33 133 Consortium is funded by the European Research Area Network (ERA-NET) on Translational  
34  
35 134 Cancer Research (TRANSCAN).

36  
37 135 The main purpose of the FOCUS Cohort profile is to (1) inform the scientific  
38  
39 136 community about the FOCUS Consortium, (2) describe the complex methodology of a large  
40  
41 137 consortium, (3) present ongoing studies using this infrastructure as well as (4) advise  
42  
43 138 interested researchers of opportunities for collaboration. This joint research may lead to a  
44  
45 139 better understanding of the role of folate- and FOCM-related mechanisms in the prognosis of  
46  
47 140 CRC and be a precursor for data for future randomized controlled trials, which will be critical  
48  
49 141 for the development of guidelines regarding folate intake among CRC patients.

#### 142 **Cohort description**

143 The FOCUS Consortium is an international, prospective consortium including six cohort  
144  
145 144 studies recruiting women and men age 18 years and older diagnosed with a primary CRC. The  
146  
147 145 FOCUS Consortium is comprised of patients from the ColoCare Study at the University of  
148  
149 146 Heidelberg, Germany (n=298, 12.3%), the ColoCare Study at the Huntsman Cancer Institute  
150  
151 147 in Salt Lake City, Utah, USA (n=80, 3.3%), the ColoCare Study at the Fred Hutchinson  
152  
153 148 Cancer Research Center in Seattle, Washington, USA (n=157, 6.3%), the COLON Study  
154  
155 149 (Colorectal cancer: Longitudinal, Observational study on Nutritional and lifestyle factors that  
156  
157 150 may influence colorectal tumor recurrence, survival and quality of life) at Wageningen  
158  
159 151 University & Research in the Netherlands (n=1,365, 56.1%), the CORSA Study (Colorectal  
160

1  
2  
3 152 Cancer Study of Austria) at the Medical University of Vienna in Austria (n=218, 9.0%), and  
4  
5 153 the EnCoRe Study (Energy for life after ColoRectal cancer) at Maastricht University Medical  
6  
7 154 Center+ in the Netherlands (n=317, 13.0%).

8  
9 155 In total, n=2,435 CRC patients were considered for the FOCUS Consortium, of which  
10  
11 156 n=34 patients were excluded due to tumor staging being either 0 or IV leading to a total  
12  
13 157 number of n=2,401 stage I-III CRC patients included in further analyses.

14  
15 158 Patients were recruited after CRC diagnosis and repeated study measurements were  
16  
17 159 conducted at time of recruitment, and at six and twelve months thereafter. At each study time  
18  
19 160 point, sociodemographic data, data on lifestyle factors (e.g., diet, supplement use, physical  
20  
21 161 activity), and clinical data (e.g., tumor site and stage, cancer treatment, treatment-induced  
22  
23 162 toxicities, recurrence, survival) were collected, and blood samples were drawn (**Figure 1**). All  
24  
25 163 individuals signed informed consent and the Institutional Review Board at each site approved  
26  
27 164 the corresponding study. Below, a more specific description of each included study is  
28  
29 165 provided.

### 30 166 The ColoCare Study

31 167 The ColoCare Study (ClinicalTrials.gov identifier: NCT02328677) is an ongoing  
32  
33 168 international, multi-center prospective cohort study among women and men newly diagnosed  
34  
35 169 with a primary invasive CRC, with the goal to investigate predictors of cancer recurrence,  
36  
37 170 survival, treatment toxicities and health-related quality of life.<sup>4 21</sup> Three ColoCare Consortium  
38  
39 171 sites participate in the FOCUS Consortium: the Fred Hutchinson Cancer Research Center in  
40  
41 172 Seattle (Washington, USA), and the University Hospital Heidelberg, Heidelberg (Germany)  
42  
43 173 as well as the Huntsman Cancer Institute in Salt Lake City (Utah, USA). Patients are enrolled  
44  
45 174 prior to undergoing CRC surgery according to the following inclusion criteria: individuals  
46  
47 175 who are 18 years of age and older, newly diagnosed (i.e., non-recurrent) with invasive CRC.  
48  
49 176 Blood draws and other biospecimens are obtained prior to surgery and at regular intervals  
50  
51 177 (e.g., six, twelve, twenty-four months). Questionnaires are administered to assess lifestyle  
52  
53 178 behavior, health-related quality of life, and clinical outcomes such as CRC recurrence,  
54  
55 179 treatment, and treatment symptoms at each study time point. Clinical data are obtained  
56  
57 180 through reviews of patient medical records, pathology and imaging reports. Vital status is  
58  
59 181 obtained through medical records, routine follow-up mailings, periodic requests for outside  
60  
182 medical records, and state or national cancer and death registries. The Heidelberg ColoCare  
183 Study was approved by the Ethics Committee of the Medical Faculty of Heidelberg (approval  
184 no. S-310/2001 and S-134/2016). The ColoCare Study at the Huntsman Cancer Institute and

1  
2  
3 185 the Fred Hutchinson Cancer Research Center were approved by the respective IRBs (#77147  
4  
5 186 and #6407).

6  
7  
8 187 The COLON Study

9  
10 188 The COLON Study (ClinicalTrials.gov identifier: NCT03191110) started in 2010 and is an  
11  
12 189 ongoing, multicenter prospective cohort study specifically designed to assess associations  
13  
14 190 between nutrition, lifestyle, and dietary supplement use with quality of life, CRC recurrence  
15  
16 191 and survival among CRC patients (stages I-IV).<sup>22</sup> Persons with a history of CRC or (partial)  
17  
18 192 bowel resection, chronic inflammatory bowel disease, or a known hereditary CRC syndrome  
19  
20 193 are excluded from the study. Patients are recruited from eleven regional and academic  
21  
22 194 hospitals prior to surgery. Individuals donate blood samples and provide information on diet,  
23  
24 195 lifestyle, and dietary supplement use at CRC diagnosis, i.e. baseline, and at six, twelve  
25  
26 196 (chemotherapy patients only), twenty-four and sixty months after diagnosis. Clinical data are  
27  
28 197 collected through review of medical records (treatment-induced toxicity) or through linkage  
29  
30 198 with the Dutch ColoRectal Audit (DCRA). Mortality data (i.e. death or alive and date of  
31  
32 199 death) are retrieved from the Municipal Personal Records Database. Recurrence data have  
33  
34 200 been retrieved in collaboration with the Netherlands Cancer Registry. Ethical approval for the  
35  
36 201 study was granted by the Committee on Research involving Human Subjects, region Arnhem-  
37  
38 202 Nijmegen under file number 2009/349.

39  
40 203 The CORSA Study

41  
42 204 CORSA is an ongoing case-control study of women and men recruiting CRC patients,  
43  
44 205 patients with high and low risk adenomas and population-based colonoscopy negative  
45  
46 206 controls, with an age range between 30 and 90 years. Since 2003, more than 13,500  
47  
48 207 participants have been recruited across nine sites in Austria. The multicentre recruitment  
49  
50 208 within CORSA follows standardized protocols resulting in consistent data from all  
51  
52 209 recruitment sites. These sites include the Medical University of Vienna (Department of  
53  
54 210 Surgery), two hospitals in Vienna (Clinic Favoriten and Clinic Landstraße), and the Hospital  
55  
56 211 Wiener Neustadt in Lower Austria. Furthermore, the recruitment for CORSA was performed  
57  
58 212 in four hospitals in the federal state Burgenland within the population-based screening  
59  
60 213 program "Burgenland PREvention Trial of colorectal cancer DIsease with ImmunologiCal  
214  
215 214 Testing" (B-PREDICT). B-PREDICT is a two-stage screening project where more than  
216  
215 215 150,000 inhabitants of Burgenland aged between 40 and 80 are invited annually to participate  
216  
216 216 in this program using a Fecal Immunochemical Test (FIT) as an initial screening. FIT-positive



1  
2  
3 217 ( $\geq 10$   $\mu\text{g}$  hemoglobin / g feces) tested individuals are offered a complete colonoscopy and are  
4  
5 218 asked to participate in CORSA. Biospecimen are collected at each site using harmonized  
6  
7 219 protocols. CORSA participants provide a basic CORSA questionnaire assessing data on body  
8  
9 220 mass index (BMI), smoking history, alcohol consumption, education level, family status,  
10  
11 221 profession, basic dietary habits, and diabetes. Clinical data are abstracted from medical  
12  
13 222 records and processed in a structured database following standardized documentation  
14  
15 223 guidelines and according to the General Data Protection Regulation (GDPR). All subjects  
16  
17 224 gave written informed consent and the study was approved by the institutional review boards:  
18  
19 225 ‘Ethikkommission Burgenland’ (33/2010), by the ethical review committee of the Medical  
20  
21 226 University of Vienna (1160/2016) and by the “Ethikkommission der Stadt Wien” (EK 06-  
22  
23 227 150VK).

### 23 228 The EnCoRe Study

24  
25  
26 229 The EnCoRe Study is a prospective cohort study initiated in 2012 at the Maastricht University  
27  
28 230 Medical Center+ in the Netherlands that focuses on the importance of lifestyle factors for  
29  
30 231 quality of life, recurrence and survival of CRC patients.<sup>23</sup> The EnCoRe Study is registered in  
31  
32 232 the Netherlands Trial Registry for experimental and observational studies  
33  
34 233 ([www.trialregister.nl](http://www.trialregister.nl), registration number 7099). Stage I-III CRC patients are enrolled at  
35  
36 234 diagnosis at three hospitals in the South-Eastern region of the Netherlands and followed up  
37  
38 235 until five years after completion of treatment with repeated measurements at diagnosis (pre-  
39  
40 236 treatment), and at six weeks and six, twelve, twenty-four, and sixty months after the end of  
41  
42 237 the initial anti-cancer treatment (i.e., surgery, chemotherapy, radiotherapy). Patients with  
43  
44 238 stage IV CRC, an inability to understand the Dutch language in speech or writing, with  
45  
46 239 comorbidities obstructing successful participation (e.g., Alzheimer disease), or with severe  
47  
48 240 visibility or hearing disorders are excluded from the study. Repeated home visits by trained  
49  
50 241 dieticians are conducted and data are collected amongst others on sociodemographic factors,  
51  
52 242 quality of life, functioning, physical activity, comorbidity, dietary intake, supplement use, and  
53  
54 243 anthropometry. In addition, clinical data are collected from hospital records and blood  
55  
56 244 samples are drawn at all time points. Recurrence data have been retrieved in collaboration  
57  
58 245 with the Netherlands Cancer Registry. Mortality data (i.e. death or alive and date of death) are  
59  
60 246 retrieved from the Municipal Personal Records Database. The EnCoRe Study was approved  
247  
248 by the Medical Ethics Committee of the Maastricht University Hospital and Maastricht  
University (METC 11-3-075).

## 249 The FOCUS Consortium

250 Sociodemographic and clinical characteristics of the 2,401 participants in the FOCUS  
251 Consortium are presented in **Table 1**. The mean age at CRC diagnosis was 65.4 years  
252 (standard deviation (SD): 10.2; range: 22 to 93 years), and the majority of participants were  
253 male (64.0%). The mean BMI was 27.0 kg/m<sup>2</sup> (SD: 4.6).

254 In terms of education status, 35.9% of the patients reported lower education, 28.8% reported  
255 intermediate education and 27.3% high education. Most of the patients were married or part  
256 of a living community (73.1%). About half of the overall cohort reported to be a former  
257 smoker (50.8%), 31.7% were never smokers, and 12.1% were current smokers (5.4% were  
258 unknown). Median alcohol intake was 7.9 g/day. In total, 16.9% of the patients reported  
259 regular dietary supplementation (i.e., at least once per week during the last four weeks) of  
260 folic acid. Over half of all participants (54.6%) reported adherence to the physical activity  
261 guidelines of at least 150 minutes per week of moderate-to-vigorous physical activity.  
262 Lifestyle characteristics of the FOCUS cohort are presented in **Table 2**.

263 Regarding clinical characteristics, 57.0% of participants were diagnosed with colon cancer,  
264 33.9% with rectal cancer, and 1.1% with rectosigmoid cancer (8.1% were of unknown tumor  
265 subsite). In total, 26.0% were diagnosed with stage I, 28.7% with stage II, and 40.2% with  
266 stage III CRC. Approximately 1% of participants were classified with an unspecified cancer  
267 stage, as distinction between stage I and II or II and III was not possible, and for 4.4% of the  
268 total population the cancer stage was unknown. In total, 89.3% of patients underwent surgery,  
269 whereas neoadjuvant chemotherapy was administered to 10.6% of patients and 26.8%  
270 received adjuvant chemotherapy. Neoadjuvant radiotherapy was administered to 20.7% of  
271 patients and adjuvant radiotherapy in 9.4% of the population.

## 272 **Patient and public involvement**

273 Patients and the public were not involved in the design, conduct, reporting or dissemination  
274 plans of this research.

**Table 1: Sociodemographic and clinical factors of eligible FOCUS Consortium participants at baseline (n=2,401)**

|                                   | <b>Overall</b> | <b>ColoCare HD</b> | <b>ColoCare FHCRC</b> | <b>ColoCare HCI</b> | <b>COLON</b> | <b>CORSA</b> | <b>EnCoRe</b> |
|-----------------------------------|----------------|--------------------|-----------------------|---------------------|--------------|--------------|---------------|
| n (%)                             | 2,401 (100)    | 298 (12.4)         | 150 (6.3)             | 80 (3.3)            | 1,338 (55.7) | 218 (9.1)    | 317 (13.2)    |
| <b>Age</b>                        |                |                    |                       |                     |              |              |               |
| <b>Mean y ± SD</b>                | 65.4 ± 10.2    | 63.7 ± 12.2        | 58.3 ± 12.8           | 61.3 ± 11.2         | 66.1 ± 8.7   | 67.3 ± 12.0  | 66.9 ± 9.3    |
| <b>Sex</b>                        |                |                    |                       |                     |              |              |               |
| <b>Female n (%)</b>               | 864 (36.0)     | 100 (33.6)         | 67 (44.7)             | 32 (40.0)           | 486 (36.3)   | 76 (34.9)    | 103 (32.5)    |
| <b>Male n (%)</b>                 | 1,537 (64.0)   | 198 (66.4)         | 83 (55.3)             | 48 (60.0)           | 852 (63.7)   | 142 (65.1)   | 214 (67.5)    |
| <b>Education</b>                  |                |                    |                       |                     |              |              |               |
| <b>Low n (%)</b>                  | 861 (35.9)     | 123 (41.3)         | 18 (12.0)             | 17 (21.3)           | 543 (40.6)   | 73 (33.5)    | 87 (27.4)     |
| <b>Intermediate n (%)</b>         | 694 (28.9)     | 57 (19.1)          | 71 (47.3)             | 40 (50.0)           | 332 (24.8)   | 73 (33.5)    | 121 (38.2)    |
| <b>High n (%)</b>                 | 658 (27.4)     | 88 (29.5)          | 28 (18.7)             | 8 (10.0)            | 417 (31.7)   | 14 (6.4)     | 103 (32.5)    |
| <b>Unknown n (%)</b>              | 188 (7.8)      | 30 (10.1)          | 33 (22.0)             | 15 (18.7)           | 46 (3.4)     | 58 (26.6)    | 6 (1.9)       |
| <b>Marital status</b>             |                |                    |                       |                     |              |              |               |
| <b>Unmarried n (%)</b>            | 122 (5.1)      | 19 (6.4)           | 15 (10.0)             | 2 (2.5)             | 60 (4.5)     | 10 (4.6)     | 16 (5.1)      |
| <b>Married n (%)</b>              | 1,738 (72.4)   | 193 (64.8)         | 71 (47.3)             | 50 (62.5)           | 1,071 (80.0) | 113 (51.8)   | 240 (75.7)    |
| <b>Divorced/Separated n (%)</b>   | 138 (5.7)      | 24 (8.0)           | 11 (7.3)              | 10 (12.5)           | 64 (4.8)     | 14 (6.4)     | 15 (4.7)      |
| <b>Widowed n (%)</b>              | 194 (8.1)      | 31 (10.4)          | 7 (4.7)               | 1 (1.3)             | 90 (6.7)     | 26 (11.9)    | 39 (12.3)     |
| <b>Living community n (%)</b>     | 20 (0.8)       | 0                  | 13 (8.7)              | 2 (2.5)             | 4 (0.3)      | 1 (0.5)      | 0             |
| <b>Unknown n (%)</b>              | 189 (8.9)      | 31 (10.4)          | 33 (22.0)             | 15 (18.7)           | 49 (3.7)     | 54 (24.8)    | 7 (2.2)       |
| <b>Smoking status</b>             |                |                    |                       |                     |              |              |               |
| <b>Current n (%)</b>              | 290 (12.1)     | 53 (17.8)          | 8 (5.3)               | 6 (7.5)             | 143 (10.7)   | 38 (17.4)    | 42 (13.3)     |
| <b>Former n (%)</b>               | 1,219 (50.8)   | 132 (44.3)         | 53 (35.32)            | 21 (26.3)           | 767 (57.3)   | 76 (34.9)    | 170 (53.6)    |
| <b>Never n (%)</b>                | 767 (31.9)     | 90 (30.2)          | 56 (37.3)             | 39 (48.7)           | 386 (28.9)   | 97 (44.5)    | 99 (31.2)     |
| <b>Unknown n (%)</b>              | 125 (5.2)      | 23 (7.7)           | 33 (22.0)             | 14 (17.5)           | 42 (3.1)     | 7 (3.2)      | 6 (1.9)       |
| <b>Alcohol intake</b>             |                |                    |                       |                     |              |              |               |
| <b>Mean g/day ± SD</b>            | 13.6 ± 17.1    | 16.1 ± 19.2        | 8.8 ± 18.5            | 2.3 ± 10.2          | 14.0 ± 17.0  |              | 12.9 ± 16.5   |
| <b>Unknown n (%)</b>              | 633 (26.4)     | 208 (69.8)         | 81 (54.0)             | 60 (75.0)           | 54 (4.1)     | 218 (100)    | 12 (3.8)      |
| <b>BMI at diagnosis</b>           |                |                    |                       |                     |              |              |               |
| <b>Mean kg/m<sup>2</sup> ± SD</b> | 27.1 ± 4.6     | 26.6 ± 4.1         | 28.7 ± 7.3            | 29.4 ± 7.5          | 26.6 ± 4.0   | 27.7 ± 4.4   | 28.3 ± 4.6    |
| <b>Unknown n (%)</b>              | 42 (1.7)       | 2 (0.7)            | 0                     | 14 (17.5)           | 10 (0.8)     | 14 (6.4)     | 2 (0.6)       |

|                                       | Overall      | ColoCare HD | ColoCare FHCRC | ColoCare HCI | COLON        | CORSA      | EnCoRe     |
|---------------------------------------|--------------|-------------|----------------|--------------|--------------|------------|------------|
| <b>Tumor site</b>                     |              |             |                |              |              |            |            |
| <b>Colon n (%)</b>                    | 1,450 (60.4) | 140 (57.0)  | 75 (50.0)      | 45 (56.3)    | 867 (64.8)   | 131 (60.1) | 192 (60.6) |
| <b>Rectum n (%)</b>                   | 862 (35.9)   | 143 (48.0)  | 60 (40.0)      | 22 (27.5)    | 434 (32.4)   | 78 (35.8)  | 125 (39.4) |
| <b>Rectosigmoid n (%)</b>             | 42 (1.7)     | 15 (5.0)    | 15 (10.0)      | 7 (8.7)      | 0            | 5 (2.3)    | 0          |
| <b>Unknown n (%)</b>                  | 47 (2.0)     | 0           | 0              | 6 (7.5)      | 37 (2.8)     | 4 (1.8)    | 0          |
| <b>Tumor stage</b>                    |              |             |                |              |              |            |            |
| <b>I n (%)</b>                        | 629 (26.2)   | 76 (25.5)   | 35 (23.3)      | 21 (26.3)    | 326 (24.4)   | 82 (37.6)  | 89 (28.1)  |
| <b>II n (%)</b>                       | 694 (28.9)   | 114 (38.3)  | 49 (32.7)      | 23 (28.7)    | 386 (28.9)   | 52 (23.9)  | 70 (22.1)  |
| <b>III n (%)</b>                      | 973 (40.5)   | 108 (36.2)  | 66 (44.0)      | 36 (45.0)    | 564 (42.1)   | 52 (23.9)  | 147 (46.4) |
| <b>Unspecified* n (%)</b>             | 16 (0.7)     | 0           | 0              | 0            | 4 (0.3)      | 12 (5.5)   | 0          |
| <b>Unknown n (%)</b>                  | 89 (3.7)     | 0           | 0              | 0            | 58 (4.3)     | 20 (9.2)   | 11 (3.5)   |
| <b>Treatment</b>                      |              |             |                |              |              |            |            |
| <b>Neoadjuvant chemotherapy n (%)</b> | 331 (13.8)   | 55 (18.5)   | 47 (31.3)      | 15 (18.8)    | 138 (10.3)   | 14 (6.4)   | 62 (19.6)  |
| <b>Unknown n (%)</b>                  | 58 (2.4)     | 2 (0.7)     | 1 (0.7)        | 10 (12.5)    | 38 (2.8)     | 7 (3.2)    | 0          |
| <b>Neoadjuvant radiotherapy n (%)</b> | 523 (21.8)   | 72 (24.2)   | 48 (32.0)      | 13 (16.3)    | 290 (21.7)   | 14 (6.4)   | 86 (27.1)  |
| <b>Unknown n (%)</b>                  | 58 (2.4)     | 2 (0.7)     | 1 (0.7)        | 10 (12.5)    | 38 (2.8)     | 7 (3.2)    | 0          |
| <b>Adjuvant chemotherapy n (%)</b>    | 682 (28.4)   | 100 (33.6)  | 80 (53.3)      | 32 (40.0)    | 315 (23.8)   | 56 (25.7)  | 99 (31.2)  |
| <b>Unknown n (%)</b>                  | 121 (5.0)    | 17 (5.7)    | 3 (2.0)        | 28 (35.0)    | 63 (4.7)     | 9 (4.1)    | 1 (0.3)    |
| <b>Adjuvant radiotherapy n (%)</b>    | 227 (9.5)    | 188 (63.1)  | 7 (4.7)        | 1 (1.3)      | 16 (1.2)     | 13 (6.0)   | 2 (0.6)    |
| <b>Unknown n (%)</b>                  | 164 (6.8)    | 17 (5.7)    | 3 (2.0)        | 28 (35.0)    | 106 (7.9)    | 9 (4.1)    | 1 (0.3)    |
| <b>Surgery n (%)</b>                  | 2,291 (95.4) | 298 (100.0) | 149 (99.3)     | 71 (88.7)    | 1,290 (96.4) | 195 (89.5) | 288 (90.9) |
| <b>Unknown n (%)</b>                  | 44 (1.8)     | 0           | 0              | 3 (3.8)      | 39 (2.9)     | 1 (0.5)    | 1 (0.3)    |

\*Distinguishing between stage I and II or II and III not possible

**Table 2: Lifestyle characteristics of eligible FOCUS Consortium participants at baseline (n=2,401)**

|                                                   | Overall         | ColoCare HD     | ColoCare FHCRC | ColoCare HCI    | COLON           | CORSA     | EnCoRe          |
|---------------------------------------------------|-----------------|-----------------|----------------|-----------------|-----------------|-----------|-----------------|
| n (%)                                             | 2,401 (100)     | 298 (12.4)      | 150 (6.3)      | 80 (3.3)        | 1,338 (55.7)    | 218 (9.1) | 317 (13.2)      |
| <b>Folic acid supplementation</b>                 |                 |                 |                |                 |                 |           |                 |
| Yes n (%)                                         | 405 (16.9)      | 4 (1.3)         | 9 (5.9)        | 2 (2.5)         | 325 (24.3)      |           | 65 (20.5)       |
| Unknown n (%)                                     | 383 (15.9)      | 27 (9.1)        | 86 (56.6)      | 14 (17.5)       | 38 (2.8)        | 218 (100) | 0               |
| <b>Vitamin B<sub>12</sub> supplementation</b>     |                 |                 |                |                 |                 |           |                 |
| Yes n (%)                                         | 430 (17.9)      | 10 (3.4)        | 8 (5.3)        | 14 (17.5)       | 336 (25.1)      |           | 62 (19.6)       |
| Unknown n (%)                                     | 384 (16.0)      | 27 (9.1)        | 86 (56.6)      | 14 (17.5)       | 39 (2.9)        | 218 (100) | 0               |
| <b>Vitamin B<sub>6</sub> supplementation</b>      |                 |                 |                |                 |                 |           |                 |
| Yes n (%)                                         | 77 (3.2)        | 8 (2.7)         | 4 (2.6)        | 4 (5.0)         |                 |           | 61 (19.2)       |
| Unknown n (%)                                     | 1,684 (70.1)    | 27 (9.1)        | 86 (56.6)      | 14 (17.5)       | 1,339 (100)     | 218 (100) | 0               |
| <b>Vitamin B<sub>2</sub> supplementation</b>      |                 |                 |                |                 |                 |           |                 |
| Yes n (%)                                         | 62 (2.6)        | 0               | 2 (1.3)        | 0               |                 |           | 60 (18.9)       |
| Unknown n (%)                                     | 1,684 (70.1)    | 27 (9.1)        | 86 (56.6)      | 14 (17.5)       | 1,339 (100)     | 218 (100) | 0               |
| <b>Dietary intake of folate equivalents</b>       |                 |                 |                |                 |                 |           |                 |
| Mean µg/day ± SD                                  | 227.1 ± 94.3    | 115.1 ± 38.1    | 149.6 ± 97.5   | 116.2 ± 112.8   | 229.0 ± 88.7    |           | 276.3 ± 82.2    |
| Unknown n (%)                                     | 638 (26.5)      | 208 (69.8)      | 83 (54.6)      | 60 (75.0)       | 57 (4.3)        | 218 (100) | 12 (3.8)        |
| <b>Dietary intake of vitamin B<sub>12</sub></b>   |                 |                 |                |                 |                 |           |                 |
| Mean µg/day ± SD                                  | 4.6 ± 2.4       | 6.2 ± 2.9       | 7.1 ± 5.8      | 4.2 ± 2.2       | 4.3 ± 2.1       |           | 4.6 ± 2.0       |
| Unknown n (%)                                     | 638 (26.5)      | 208 (69.8)      | 83 (54.6)      | 60 (75.0)       | 57 (4.3)        | 218 (100) | 12 (3.8)        |
| <b>Dietary intake of vitamin B<sub>6</sub></b>    |                 |                 |                |                 |                 |           |                 |
| Mean mg/day ± SD                                  | 1.5 ± 0.5       | 1.7 ± 0.5       | 2.0 ± 0.7      | 1.5 ± 0.7       | 1.5 ± 0.5       |           | 1.8 ± 0.5       |
| Unknown n (%)                                     | 638 (26.5)      | 208 (69.8)      | 83 (54.6)      | 60 (75.0)       | 57 (4.3)        | 218 (100) | 12 (3.8)        |
| <b>Dietary intake of vitamin B<sub>2</sub></b>    |                 |                 |                |                 |                 |           |                 |
| Mean mg/day ± SD                                  | 1.4 ± 0.5       | 1.5 ± 0.5       | 2.2 ± 1.0      | 1.6 ± 0.8       | 1.3 ± 0.4       |           | 1.4 ± 0.5       |
| Unknown n (%)                                     | 638 (26.5)      | 208 (69.8)      | 83 (54.6)      | 60 (75.0)       | 57 (4.3)        | 218 (100) | 12 (3.8)        |
| <b>Total energy intake</b>                        |                 |                 |                |                 |                 |           |                 |
| Mean kcal/day ± SD                                | 1,941.8 ± 593.6 | 2,330.9 ± 714.0 | 1835.0 ± 775.7 | 1,398.5 ± 597.8 | 1,856.9 ± 517.2 |           | 2,243.7 ± 651.0 |
| Unknown n (%)                                     | 638 (26.5)      | 208 (69.8)      | 83 (54.6)      | 60 (75.0)       | 57 (4.3)        | 218 (100) | 12 (3.8)        |
| <b>Adherence to physical activity guidelines*</b> |                 |                 |                |                 |                 |           |                 |

|                      |              |           |           |           |            |           |            |
|----------------------|--------------|-----------|-----------|-----------|------------|-----------|------------|
| <b>Yes n (%)</b>     | 1,310 (54.5) | 84 (28.2) | 35 (23.0) | 20 (25.0) | 941 (70.3) |           | 230 (72.6) |
| <b>Unknown n (%)</b> | 370 (15.4)   | 33 (11.1) | 53 (34.9) | 15 (18.7) | 45 (3.4)   | 218 (100) | 6 (1.9)    |

\*Self-reported engagement in at least 150 minutes per week of moderate-to-vigorous physical activity

For peer review only

## 280 **Cohort follow-up**

281 At each study site, collection of biospecimen, clinical, demographic, questionnaire and  
282 anthropometric data occurred at baseline, and at six and twelve months following recruitment.  
283 Baseline measurements in CORSA, COLON and EnCoRe have been performed at diagnosis  
284 (preferably prior to any cancer treatment) while in the ColoCare Study such measurements  
285 have been done prior to surgery (i.e. neoadjuvant treatment might have been applied prior to  
286 baseline blood and data collection).

287 Blood samples at baseline were collected from n=2,132 (88.8%) study participants.  
288 N=1,537 (64.0%) participants donated blood at the 6 month and n=614 (25.6%) at the 12  
289 month follow-up time point. Additionally, n=251 (10.5%) EnCoRe patients provided blood  
290 samples at 6 weeks post-treatment, a subset specifically of interest at the Maastricht study  
291 site.

## 292 **Data collection**

293 Harmonized baseline and follow-up time points are summarized in **Table 3** and are briefly  
294 described below.

### 295 Lifestyle and demographic data

296 ColoCare questionnaires and standardized Food Frequency Questionnaires (FFQ) are used to  
297 assess intake of dietary supplements and medication, smoking, dietary intake and other health  
298 behaviors at each study time point. In COLON, patients provide information on diet, lifestyle,  
299 and supplement use via COLON questionnaires and FFQs. Patients from the CORSA Study  
300 are requested to complete a questionnaire assessing anthropometric and demographic factors.  
301 Patients enrolled in EnCoRe receive repeated home visits by trained dietitians, where  
302 extensive measurements are performed that include assessment of demographic data, physical  
303 activity (both questionnaire- and accelerometry-based) and smoking behavior (questionnaire  
304 data), dietary intake (FFQs at diagnosis and 7-day food diaries at follow-up measurements),  
305 supplement use (registered by dietitians), and anthropometry measurements.

**Table 3: Variables available at baseline, and at 6 and 12 month follow-up within the FOCUS Consortium.**

| Category                 | Variables                           | Baseline           | 6m | 12m |
|--------------------------|-------------------------------------|--------------------|----|-----|
| <b>Demographics</b>      | Age                                 | x                  | x  | x   |
|                          | Gender                              | x                  |    |     |
|                          | Highest education                   | x                  |    |     |
|                          | Social status                       | x                  |    |     |
|                          | Height                              | x                  |    |     |
|                          | Weight                              | x                  | x  | x   |
|                          | BMI                                 | x                  | x  | x   |
|                          | Smoking status                      | x                  | x  | x   |
|                          | Smoking duration                    | x                  | x  | x   |
|                          | Smoking pack years                  | x                  | x  | x   |
|                          | Menopausal status                   | x                  |    |     |
|                          | Postmenopausal hormone use          | x                  |    |     |
|                          | Race                                | x                  |    |     |
|                          | <b>Cancer characteristics</b>       | Cancer site        | x  |     |
| Cancer stage             |                                     | x                  |    |     |
| TNM classification       |                                     | x                  |    |     |
| <b>Treatment</b>         | Preoperative chemotherapy           | x                  |    |     |
|                          | Preoperative radiotherapy           | x                  |    |     |
|                          | Surgery                             | x                  | x  |     |
|                          | Postoperative chemotherapy          |                    | x  | x   |
|                          | Postoperative radiotherapy          |                    | x  | x   |
| <b>Supplement intake</b> | Folic acid supplements              | x                  | x  | x   |
|                          | Vitamin B <sub>2</sub> supplements  | x                  | x  | x   |
|                          | Vitamin B <sub>6</sub> supplements  | x                  | x  | x   |
|                          | Vitamin B <sub>12</sub> supplements | x                  | x  | x   |
|                          | Vitamin A supplements               | x                  | x  | x   |
|                          | Vitamin C supplements               | x                  | x  | x   |
|                          | Vitamin D supplements               | x                  | x  | x   |
| <b>Supplement intake</b> | Vitamin E supplements               | x                  | x  | x   |
|                          | Calcium supplements                 | x                  | x  | x   |
|                          | Magnesium supplements               | x                  | x  | x   |
|                          | Iron supplements                    | x                  | x  | x   |
|                          | Multivitamins                       | x                  | x  | x   |
|                          | <b>Dietary nutrients</b>            | Folate equivalents | x  | x   |
| Vitamin B <sub>2</sub>   |                                     | x                  | x  | x   |
| Vitamin B <sub>6</sub>   |                                     | x                  | x  | x   |
| Vitamin B <sub>12</sub>  |                                     | x                  | x  | x   |
| Vitamin A                |                                     | x                  | x  | x   |
| Vitamin C                |                                     | x                  | x  | x   |
| Vitamin D                |                                     | x                  | x  | x   |
| Vitamin E                |                                     | x                  | x  | x   |
| Total protein            |                                     | x                  | x  | x   |
| Total fat                | x                                   | x                  | x  |     |
| Total carbohydrate       | x                                   | x                  | x  |     |



|                                       |                                                                  |   |   |   |
|---------------------------------------|------------------------------------------------------------------|---|---|---|
| <b>Dietary nutrients</b>              | Fibre                                                            | x | x | x |
|                                       | Saturated fatty acids                                            | x | x | x |
|                                       | Monounsaturated fatty acids                                      | x | x | x |
|                                       | Polyunsaturated fatty acids                                      | x | x | x |
|                                       | Alcohol                                                          | x | x | x |
|                                       | Total energy                                                     | x | x | x |
| <b>Physical activity</b>              | Light physical activity                                          | x | x | x |
|                                       | Moderate physical activity                                       | x | x | x |
|                                       | Vigorous physical activity                                       | x | x | x |
|                                       | Adherence to physical activity guidelines                        | x | x | x |
| <b>Medical history</b>                | Diabetes mellitus                                                | x | x | x |
|                                       | Asthma, Chronical Bronchitis, COPD, Emphysema                    | x |   |   |
|                                       | Heart attack, Heart Failure                                      | x |   |   |
|                                       | Hypertension                                                     | x |   |   |
|                                       | Stroke                                                           | x |   |   |
|                                       | Ulcer of Stomach or Duodenum                                     | x |   |   |
|                                       | Hypothyroidism/Hyperthyroidism                                   | x |   |   |
|                                       | Systemic Lupus Erythematosus                                     | x |   |   |
|                                       | Inflammatory Bowel Disease (Crohn's disease, ulcerative colitis) | x |   |   |
|                                       | Familial Adenomatous Polyposis                                   | x |   |   |
| <b>Medical history</b>                | Lynch Syndrome (hereditary nonpolyposis colorectal cancer)       | x |   |   |
| <b>Regular medication use</b>         | Aspirin                                                          | x | x | x |
|                                       | NSAID                                                            | x | x | x |
|                                       | Ibuprofen                                                        | x | x | x |
|                                       | Naproxen                                                         | x | x | x |
|                                       | Celecoxib/Etoricoxib                                             | x | x | x |
| <b>Health-related quality of life</b> | EORTC QLQ-C30                                                    | x | x | x |
|                                       | EORTC QLQ-CR29                                                   | x | x | x |
|                                       | EORTC QLQ-CIPN20                                                 | x | x | x |
| <b>General information</b>            | Date of questionnaire completion                                 | x | x | x |
|                                       | Date of blood collection                                         | x | x | x |
|                                       | Freeze-thaw cycles of blood samples                              | x | x | x |
|                                       | Hemolysis                                                        | x | x | x |
|                                       | Time between blood draw and processing/storage                   | x | x | x |

NSAID=non-steroidal anti-inflammatory drug; EORTC=European Organization for Research and Treatment of Cancer; QLQ=quality of life questionnaire; C30=core 30-items; CR29=colon/rectum 29-items; CIPN20=chemotherapy-induced polyneuropathy 20-items.

306

### 307 Clinical data and outcomes - Medical chart abstraction

308 All cancers and medical diagnoses are classified according to ICD-10 (International  
309 Classification of Diseases, Tenth Revision) codes. Details on CRC treatment, including type  
310 of treatment regimens and treatment toxicity, are abstracted via medical record for all cohorts.  
311 Detailed information on the primary outcomes of interest, CRC recurrence and survival, are  
312 ascertained through reviews of medical records, pathology reports, and imaging reports  
313 documenting the diagnosis of a recurrence. Data on recurrence and vital status is  
314 supplemented from the clinical cancer registries and survival data is verified by the inhabitant  
315 registries that exist at all study sites. For COLON and EnCoRe, all data on recurrence are  
316 retrieved in collaboration with the Netherlands Cancer Registry. Moreover, survival data for  
317 CORSA participants was obtained by the Main Association of Austrian Social Insurance  
318 Carriers as well as from Statistics Austria.

### 319 Patient-reported outcomes

320 Health-related quality of life is assessed by the validated and widely used cancer-specific 30-  
321 item core questionnaire QLQ-C30 and the 29-item CRC module QLQ-CR29, developed by  
322 the European Organization for Research and Treatment of Cancer (EORTC).<sup>24</sup>  
323 Chemotherapy-induced peripheral neuropathy (CIPN), which is a common toxicity in CRC  
324 patients, is measured by the EORTC QLQ-CIPN20.<sup>25</sup> Patient-reported outcomes are available  
325 for ColoCare Heidelberg, COLON and EnCoRe.

### 326 Biomarkers of FOCM

327 Blood is processed in identical settings across all study centers. Plasma (CORSA, COLON  
328 and EnCoRe) and serum (for the three ColoCare Study sites) samples were collected and  
329 immediately centrifuged, aliquoted, and stored at -80°C.

330 All biological analyses were performed at BEVITAL AS (Bergen, Norway,  
331 <http://www.bevital.no>), which carried out metabolic profiling of biomarkers allocated to seven  
332 complementary analytical platforms. Apart from analyses of microbiological active folate<sup>26</sup>  
333 and vitamin B<sub>12</sub><sup>27</sup>, all analyses were based on mass spectrometry. Circulating folate, separate  
334 folate species, 5-methyltetrahydrofolate (the main form in plasma), folic acid (folate in  
335 supplements), 4a-OH 5-methyltetrahydrofolate (the primary oxidation form of circulating  
336 folate), folate catabolites (p-aminobenzoylglutamate and acetyl p-aminobenzoylglutamate)<sup>28</sup>,  
337 B<sub>6</sub>, B<sub>1</sub> and B<sub>3</sub> vitamins, kynurenines, cotinine, trans-3'-hydroxycotinine, trigonelline<sup>29</sup>,  
338 choline and its metabolites, creatinine, methylhistidines, arginine and methylated arginines<sup>30</sup>

1  
2  
3 339 were analyzed by liquid chromatography-tandem mass spectroscopy, whereas other amino  
4  
5 340 acids, in addition to total homocysteine, total cysteine and methylmalonic acid were analyzed  
6  
7 341 by gass chromatography-tandem mass spectroscopy.<sup>31</sup> C-reactive protein (hsCRP) and  
8  
9 342 cystatin C and its variants were measured by MALDI-TOF mass spectroscopy.<sup>32</sup>

10  
11 343 A comprehensive overview of the panel of biomarkers measured in blood samples of  
12  
13 344 patients enrolled in the FOCUS Consortium is provided in **Table 4**.

### 14 15 345 **Findings to date**

16  
17 346 The FOCUS Consortium provides a unique opportunity to conduct comprehensive research  
18  
19 347 on folate and FOCM biomarkers status in the tertiary prevention of CRC using data collected  
20  
21 348 both at diagnosis and during standardized follow-up time points. This well-characterized  
22  
23 349 study design provides sufficient statistical power to discern prospective associations with  
24  
25 350 relevant clinical outcomes, including CRC recurrence and survival within relevant subgroups.

### 26 27 351 Key findings and publications

28  
29 352 We investigated associations of circulating concentrations of folate, folic acid, and folate  
30  
31 353 catabolites pABG and apABG, measured around time of diagnosis, with recurrence and survival  
32  
33 354 among 2024 patients diagnosed with stage I-III CRC within the international FOCUS  
34  
35 355 Consortium. We did not observe any statistically significant associations for folate, pABG, and  
36  
37 356 apABG concentrations. However, an increased risk of cancer recurrences was observed among  
38  
39 357 patients with higher compared to lower circulating folic acid concentrations.<sup>33</sup> Further, Kiblawi  
40  
41 358 et al. measured associations between one-carbon metabolites, inflammation- and angiogenesis-  
42  
43 359 related biomarkers in a cross-sectional analysis of 238 patients from the ColoCare Heidelberg  
44  
45 360 cohort. The study showed that specific folate species within the one-carbon metabolism  
46  
47 361 pathway are associated with both inflammation and angiogenesis pathways among CRC  
48  
49 362 patients. In particular, vitamin B6 species, pyridoxal 5'-phosphate (PLP), pyridoxal (PL) and  
50  
51 363 pyridoxic acid (PA), were inversely associated with inflammatory biomarkers C-reactive  
52  
53 364 protein (CRP), serum amyloid A (SAA), IL-6 and IL-8. Thiamine and thiamine monophosphate  
54  
55 365 were inversely correlated with the CRP and IL-6. In addition, positive correlations of PA, PL  
56  
57 366 and PLP with angiogenesis biomarker VEGF-D were observed. Our findings reinforce the  
58  
59 367 notion that B vitamins involved in the one-carbon metabolism may be correlated with  
60  
370 368 carcinogenic processes.<sup>34</sup> This and further research will support the evidence base needed for  
the development of dietary guidelines for CRC patients.

**Table 4: Measured metabolites and biomarkers within the FOCUS Consortium**

| <b>Folate and one-carbon metabolites</b>                   | <b>Abbreviation</b> | <b>Description</b>                           |
|------------------------------------------------------------|---------------------|----------------------------------------------|
| <b>Anthranilic acid</b>                                    | AA                  | Tryptophan metabolite                        |
| <b>Asymmetric dimethylarginine</b>                         | ADMA                | Inhibitor of nitric oxide synthase           |
| <b><math>\alpha</math>-Ketoglutaric acid</b>               | aKG                 | Keto acid of the Krebs cycle                 |
| <b>Alanine</b>                                             | Ala                 | Amino acid                                   |
| <b>Acetamidobenzoylglutamate</b>                           | apABG               | Folate catabolite                            |
| <b>Arginine</b>                                            | Arg                 | Amino acid                                   |
| <b>Asparagine</b>                                          | Asn                 | Amino acid                                   |
| <b>Aspartic acid</b>                                       | Asp                 | Amino acid                                   |
| <b>Betaine</b>                                             | Betaine             | Methyl donor                                 |
| <b>Choline</b>                                             | Choline             | Methyl donor                                 |
| <b>C-reactive protein</b>                                  | hsCRP               | Inflammatory marker                          |
| <b>Cystatin C-desS</b>                                     | CnCds               | Cystatin C isoform                           |
| <b>Cystatin C-desSSP</b>                                   | CnDcssp             | Cystatin C isoform                           |
| <b>Cystatin C</b>                                          | CnCn                | Marker of kidney function                    |
| <b>3Pro-OH cystatin C</b>                                  | CnCo                | Cystatin C isoform                           |
| <b>3Pro-OH cystatin C-desS</b>                             | CnCods              | Cystatin C isoform                           |
| <b>Total concentration of detected cystatin C isoforms</b> | CnCt                | Marker of kidney function                    |
| <b>Cobalamin</b>                                           | B <sub>12</sub>     | Vitamin B <sub>12</sub>                      |
| <b>Cotinine</b>                                            | Cot                 | Nicotine metabolite                          |
| <b>Creatinine</b>                                          | Creat               | Marker of kidney function                    |
| <b>C-reactive protein</b>                                  | CRP                 | Inflammation                                 |
| <b>Cystathionine</b>                                       | Cysta               | Thioether, transsulfuration intermediate     |
| <b>Dimethylglycine</b>                                     | DMG                 | Betaine metabolite                           |
| <b>Folic acid</b>                                          | B <sub>9</sub>      | Synthetic form of folate                     |
| <b>Flavin mononucleotide</b>                               | FMN                 | B <sub>2</sub> vitamin                       |
| <b>5-Formyl-tetrahydrofolate</b>                           | fTHF                | Folate species                               |
| <b>Glutamine</b>                                           | Gln                 | Amino acid                                   |
| <b>Glutamic acid</b>                                       | Glu                 | Amino acid                                   |
| <b>Glycine</b>                                             | Gly                 | Amino acid                                   |
| <b>3-Hydroxyanthranilic acid</b>                           | HAA                 | Tryptophan metabolite                        |
| <b>Homoarginine</b>                                        | hArg                | Amino acid                                   |
| <b>Histidine</b>                                           | Hist                | Tryptophan metabolite                        |
| <b>3-Hydroxykynurenine</b>                                 | HK                  | Tryptophan metabolite                        |
| <b>4-Alfa-hydroxy-5-methyl-THF</b>                         | hmTHF               | Folate oxidation product                     |
| <b>Isoleucine</b>                                          | Ile                 | Amino acid                                   |
| <b>Kynurenic acid</b>                                      | KA                  | Tryptophan metabolite                        |
| <b>Kynurenine</b>                                          | Kyn                 | Tryptophan metabolite                        |
| <b>Leucine</b>                                             | Leu                 | Amino acid                                   |
| <b>Lysine</b>                                              | Lys                 | Amino acid                                   |
| <b>3-Methylhistidine (3-MH)</b>                            | m3His               | Marker of muscle degradation and meat intake |
| <b>1-Methylhistidine (1-MH)</b>                            | m1His               | Marker of muscle degradation and meat intake |
| <b>Methionine</b>                                          | Met                 | Amino acid                                   |
| <b>Methionine sulfoxide</b>                                | MetSo               | Oxidation product of Met                     |
| <b>Methylmalonic acid</b>                                  | MMA                 | Marker of B <sub>12</sub> status             |
| <b>N1-methylnicotinamide</b>                               | mNAM                | B <sub>3</sub> vitamin                       |
| <b>5-Methyl-tetrahydrofolate</b>                           | mTHF                | Folate species                               |

|                                   |          |                                             |
|-----------------------------------|----------|---------------------------------------------|
| <b>Nicotinic acid</b>             | NA       | B <sub>3</sub> vitamin                      |
| <b>Nicotinamide</b>               | NAM      | B <sub>3</sub> vitamin                      |
| <b>Neopterin</b>                  | Neopt    | Inflammatory marker                         |
| <b>Trans-3'-hydroxycotinine</b>   | OHCot    | Nicotine metabolite                         |
| <b>Ornithine</b>                  | Orn      | Amino acid                                  |
| <b>4-Pyridoxic acid</b>           | PA       | Vitamin B <sub>6</sub> catabolite           |
| <b>Para-aminobenzoylglutamate</b> | pABG     | Folate catabolite                           |
| <b>Phenylalanine</b>              | Phe      | Amino acid                                  |
| <b>Picolinic acid</b>             | Pic      | Tryptophan metabolite                       |
| <b>Pyridoxal</b>                  | PL       | B <sub>6</sub> vitamin                      |
| <b>Pyridoxal 5'-phosphate</b>     | PLP      | B <sub>6</sub> vitamin                      |
| <b>Pyridoxine</b>                 | PN       | Synthetic form of vitamin B <sub>6</sub>    |
| <b>Proline</b>                    | Pro      | Amino acid                                  |
| <b>Quinolinic acid</b>            | QA       | Tryptophan metabolite                       |
| <b>Riboflavin</b>                 | Ribo     | Main circulating B <sub>2</sub> form        |
| <b>Symmetric dimethylarginine</b> | SDMA     | Marker of renal function                    |
| <b>Serine</b>                     | Ser      | Amino acid                                  |
| <b>Folate</b>                     | spFolate | Microbiologically active folate             |
| <b>Total cysteine</b>             | tCys     | Amino acid                                  |
| <b>Homocysteine</b>               | tHcy     | Marker of folate and B <sub>12</sub> status |
| <b>Thiamine</b>                   | Thi      | B <sub>1</sub> vitamin                      |
| <b>Threonine</b>                  | Thr      | Amino acid                                  |
| <b>Trimethylamineoxide</b>        | TMAO     | Choline metabolite                          |
| <b>Trimethyllysine</b>            | TML      | Amino acid                                  |
| <b>Thiamine monophosphate</b>     | TMP      | B <sub>1</sub> vitamin                      |
| <b>Trigonelline</b>               | Trig     | Marker of coffee consumption                |
| <b>Tryptophan</b>                 | Trp      | Amino acid                                  |
| <b>Valine</b>                     | Val      | Amino acid                                  |
| <b>Leucine</b>                    | Leu      | Amino acid                                  |
| <b>Xanthurenic acid</b>           | XA       | Tryptophan metabolite                       |
| <b>Kyn/Trp ratio</b>              | KTR      | Marker of immune activation                 |
| <b>HK/XA ratio</b>                |          | Marker of B <sub>6</sub> status             |

371

372 Further, we investigated circulating concentrations of nine biomarkers related to the B-

373 vitamins folate, riboflavin, vitamin B<sub>6</sub>, and cobalamin, measured at diagnosis and six months

374 post-diagnosis, in association with health-related quality of life as assessed by the EORTC

375 QLQ-C30 questionnaire six months post-treatment in three FOCUS cohorts (ColoCare

376 Heidelberg, EnCoRe and COLON).<sup>35</sup> Higher PLP concentrations were cross-sectionally

377 associated with better physical, role, and social functioning, and reduced fatigue six months

378 post-diagnosis. Higher HKr (3-hydroxykynurenine:(kynurenic acid+xanthurenic acid+3-

379 hydroxyanthranilic acid+anthranilic acid)), an inverse marker of vitamin B<sub>6</sub> status, was cross-

380 sectionally associated with worse global quality of life, and lower physical and role

381 functioning. Dose-response relations were observed for PLP with global quality of life,

382 physical, role, and social functioning. No associations were observed for changes in

383 biomarker concentrations between diagnosis and six months with quality of life outcomes. We

1  
2  
3 384 therefore concluded that higher vitamin B<sub>6</sub> status was associated with better quality of life at  
4  
5 385 six months post treatment and that further study is needed to clarify the role of vitamin B<sub>6</sub> in  
6  
7 386 relation to quality of life.

8  
9 387 Previous relevant findings from individual cohorts within the consortium

10  
11 388 To date, individual cohorts from the FOCUS Consortium have initiated the examination of  
12  
13 389 dietary supplement use and dietary habits over time. Among CRC patients enrolled in the  
14  
15 390 ColoCare Study the proportion of supplement users was found to be highest post-diagnosis  
16  
17 391 (35%).<sup>36</sup> Moreover, within an international investigation including ColoCare participants from  
18  
19 392 multiple sites, Ulrich et al. showed differences in plasma folate concentration between  
20  
21 393 Heidelberg and the US sites, probably reflecting variation in folic acid fortification and  
22  
23 394 supplement use.<sup>13</sup> Furthermore, ColoCare has published data on RECQ helicase expression<sup>37</sup>,  
24  
25 395 NTRK3<sup>38</sup>, RET<sup>39</sup>, tumor-infiltrating lymphocytes and T cell receptor sequences<sup>40</sup>, 25-25-  
26  
27 396 hydroxyvitamin D<sub>3</sub><sup>13 41</sup>, DNA methylation<sup>42-45</sup>, miRNAs<sup>46 47</sup>, fecal microbiota<sup>48-50</sup>,  
28  
29 397 metabolomics and transcriptomics<sup>51-53</sup>, plasma proteins<sup>54</sup>, gene expression<sup>55</sup>, branched-chain  
30  
31 398 amino acids<sup>56</sup>, genetic variants<sup>57</sup>, body composition<sup>53 58 59</sup>, physical activity<sup>41</sup>, and dietary  
32  
33 399 patterns<sup>4</sup> in CRC patients. Within the COLON study, results have been published on body  
34  
35 400 weight trajectories<sup>60</sup>, changes in lifestyle<sup>61</sup>, 25-hydroxy vitamin D levels<sup>62 63</sup>, and  
36  
37 401 inflammation markers<sup>64</sup> over time, as well as vitamin D<sup>64</sup>, calcium or magnesium intake<sup>65</sup>,  
38  
39 402 physical activity<sup>66</sup>, inflammation<sup>67 68</sup>, skeletal muscle mass<sup>69</sup>/ density<sup>70</sup> and other measures of  
40  
41 403 body composition<sup>71</sup> in relation to cancer recurrence, survival, or physical functioning or  
42  
43 404 fatigue. Moreover, in a subset of patients undergoing chemotherapy, dietary factors in relation  
44  
45 405 to chronic CIPN<sup>72 73</sup> as well as chemosensory perception and food preferences<sup>74</sup> were studied.  
46  
47 406 The Austrian CORSA Study has published results on genomic data<sup>75-77</sup>, telomere length<sup>78</sup>,  
48  
49 407 DNA repair processes<sup>79</sup>, tumor autoantibodies<sup>80</sup> as well as metabolomics.<sup>33 81</sup> To date,  
50  
51 408 publications from the EnCoRe Study have reported on associations of physical activity and  
52  
53 409 sedentary behaviour<sup>82-85</sup>, adherence to lifestyle guidelines<sup>86</sup>, and parameters of body  
54  
55 410 composition<sup>87 88</sup> measured through CT scans with quality of life, functioning and fatigue in  
56  
57 411 CRC survivors. Recently, longitudinal associations between supplement use and fatigue were  
58  
59 412 investigated from diagnosis to 2 years post-CRC treatment. No overall association between  
60  
413 supplement use and fatigue was found but results suggest that increased levels of fatigue may  
414  
415 be a reason for the use of supplements among CRC survivors.<sup>89</sup> Higher concentrations of  
416  
25OHD<sub>3</sub> were longitudinally associated with better global quality of life and less fatigue in  
colorectal cancer survivors within EnCoRe suggesting a potential beneficial role of vitamin D

1  
2  
3 417 in colorectal cancer survivors.<sup>35</sup> In a mixed-method study using data of the EnCoRe study,  
4 418 colorectal cancer (treatment) related health and functioning problems negatively impacted the  
5 419 ability of nearly 1 in 5 long-term CRC survivors to participate in everyday life situations and  
6 420 their satisfaction with participation.<sup>90</sup> The validity of the food frequency questionnaire for  
7 421 measuring dietary intake among survivors of colorectal cancer within the EnCoRe study  
8 422 appeared to be moderate to good for most nutrients and food groups, relative to a 7-day  
9 423 dietary record.<sup>91</sup> Prediction models that we developed for estimating 1-year risk of low health-  
10 424 related quality of life in seven domains in colorectal cancer survivors performed well when  
11 425 externally validated among survivors within the EnCoRe and COLON studies.<sup>92</sup>

### 426 **Future plans**

427 The consortium specified a comprehensive manuscript list of future projects using data from  
428 the FOCUS Consortium. Some selected projects are described below:

429 a) Recently, the investigation of longitudinal associations of adherence to the dietary World  
430 Cancer Research Fund/American Institute for Cancer Research (WCRF/AICR) and Dutch  
431 Healthy Diet (DHD) recommendations with plasma kynurenine levels in colorectal cancer  
432 survivors after treatment has been finalized and the corresponding manuscript is under review  
433 at an international journal.

434 b) Further, near-term future plans include the investigation of (1) biomarkers related to  
435 FOCM and associations with folate intake (from diet and supplements); (2) associations  
436 between FOCM biomarkers such as vitamin B12 and tryptophan and recurrence, survival, and  
437 patient-reported outcomes in CRC; (3) the impact of folate status (FOCM biomarkers and  
438 diet/supplements) on treatment toxicity in patients treated with 5-FU modifiers; (4) the  
439 interaction between biomarkers related to FOCM and polymorphisms in FOCM-related genes  
440 in relation to CRC prognosis (recurrence & survival); (5) prognosis (disease-free and overall  
441 survival) in stage I-III CRC and associations with dietary and supplement use at diagnosis and  
442 changes during and after treatment; (6) FOCM-related biomarkers and their association with  
443 body composition in stage I to III CRC patients; (7) associations between folate status  
444 (FOCM biomarkers and diet/supplement use) and recurrence, survival and patient-reported  
445 outcomes in young-onset CRC.

446 c) Long-term plans include the combination of additional biomarkers measured by the  
447 individual cohorts within the next years (e.g. microbiome data, omics- and multi-omics data  
448 etc.).

### 449 **Strengths and limitations**

450 This is the largest consortium to date addressing the research question of folate and FOCM  
451 biomarkers in relation to survival, recurrence, treatment toxicity, and health-related quality of  
452 life outcomes in CRC patients. The cohorts included in the FOCUS Consortium are designed  
453 to enable future pooling of data.<sup>22</sup> For that reason, methodologies, time points and  
454 measurement instruments generally overlap, with each study presenting unique features such  
455 as additional blood collection at the 6-week follow-up time point within the EnCoRe Study  
456 and blood draws during chemotherapy within the COLON Study. The pooled sample size  
457 provides sufficient power to investigate subgroup analyses across CRC patients, e.g., within  
458 groups of patients who underwent 5-fluorouracil based chemotherapy or stratified by disease  
459 stage. Furthermore, the assessment of biomarkers related to FOCM are conducted at a single,  
460 state-of-the art laboratory and the biological materials are processed and stored according to  
461 standardized operation protocols across all study sites, enabling precise and accurate  
462 measurements of FOCM biomarkers. Another advantage of this cohort is the ability to include  
463 a time-varying exposure on dietary supplement intake for future studies to consider. The study  
464 population is predominantly based on European cohorts (90.4%) in countries that have not  
465 implemented mandatory folic acid fortification. This enables us to study a population where  
466 dietary intake and dietary supplement use determine differences in folate status, yielding  
467 information of direct relevance to cancer patients. However, the generalizability of results to  
468 populations that have introduced folic acid fortification, including the United States, might  
469 therefore also be limited.<sup>93</sup> Performing sensitivity analyses by excluding countries without  
470 folic acid fortification (e.g. Germany) or investigating analyses separately for Germany and  
471 the US might help to address differences in fortification status. Moreover, patients were  
472 predominantly White, thus, it is not possible to address racial and ethnic minorities.  
473 Ethnicity/race is an important determinant of folate status and metabolism may be different  
474 between African Americans and Hispanics<sup>94</sup>, thus, recommendations should be limited to this  
475 current population. Future studies are warranted in diverse populations and compared with the  
476 FOCUS cohort.

477 Another limitation of the consortium includes differences in collection strategies of the  
478 baseline study time point across included studies: CORSA, COLON and EnCoRe are  
479 recruiting CRC patients at diagnosis, preferably prior to any cancer treatment while ColoCare  
480 is recruiting patients prior to surgery (i.e. neoadjuvant treatment might have occurred prior to  
481 baseline blood and data collection). Nevertheless, the ColoCare protocol requires that no  
482 blood draw occurs within 2 weeks of neoadjuvant or adjuvant chemotherapy, limiting the



1  
2  
3 483 influence of ongoing treatments on blood biomarkers. In some cohorts, the timing with  
4  
5 484 respect to adjuvant chemotherapy is less clearly defined and this will be carefully considered  
6  
7 485 in sensitivity analyses. Furthermore, survivor bias – a type of selection bias – may be  
8  
9 486 introduced as some patients died or did not complete follow-up questionnaires or did not  
10  
11 487 provide blood samples. It is possible that patients who experience more severe toxicities,  
12  
13 488 worse clinical outcomes, or worse health-related quality of life, are underrepresented among  
14  
15 489 those patients who completed follow-up measurements.<sup>4</sup> Cohort studies such as the one  
16  
17 490 presented here generate critical knowledge about preventable causes of disease. However,  
18  
19 491 selection bias may affect estimates. This is particularly true for non-participation at follow-up  
20  
21 492 that may depend on both the exposure and outcome. Within a review, Nohr et al. showed a  
22  
23 493 range of methods to quantify and adjust for selection bias. Even with limited data on  
24  
25 494 nonparticipants and those lost to follow up, it is possible to examine how effect estimates in a  
26  
27 495 specific study may be biased by selection.<sup>95</sup> The likelihood for reverse causation is small in  
28  
29 496 this prospective cohort, as the exposure measurements (blood folate levels and intake through  
30  
31 497 diet/supplements) were collected before the outcome (survival, recurrence, and quality of life)  
32  
33 498 occurred. Therefore, these outcomes are unlikely to have influenced the exposure  
34  
35 499 measurements. Given the robust follow-up in these cohorts for outcomes and data availability,  
36  
37 500 future studies will be able to consider key confounders as well as predictors of recurrence and  
38  
39 501 survival.

### 502 **Collaboration**

503 A substantial amount of time has been spent in creating the harmonized dataset of baseline  
504 variables from cohorts within the FOCUS Consortium, with follow-up data collection and  
505 FOCM biomarker analyses. Any person interested in collaborating, learning about the  
506 FOCUS Consortium or in getting access to FOCUS data and in-depth analyses can contact the  
507 coordinating study PIs Prof. Andrea Gsur ([andrea.gsur@meduniwien.ac.at](mailto:andrea.gsur@meduniwien.ac.at)) and Prof. Cornelia  
508 Ulrich ([neli.ulrich@hci.utah.edu](mailto:neli.ulrich@hci.utah.edu)). Requests for data will be discussed and decided by all PIs  
509 and will require a Data Transfer Agreement.

## 510 **Acknowledgements**

511 ColoCare Heidelberg: We thank all ColoCare study participants, the liquid biobank of the  
512 National Center for Tumor Diseases for storage of the blood samples according to the SOPs  
513 of the Biomaterialbank Heidelberg (BMBH), Michaela Magenreuter, Maria Thomalla-Starzl,  
514 Mareen, Dupovac, Marzena Knysok-Sypniewski, Lin Zielske, Anett Brendel, Renate  
515 Skatula, and Marita Wenzel for laboratory work, Rifraz Farook, Dr. Werner Diehl and Inna  
516 Müller for data management and clinical follow-up data collection, Dr. Clare Abbenhardt-  
517 Martin, Susanne Jakob, Judith Kammer for patient recruitment and follow-up, and Dr. Petra  
518 Schrotz-King and Dr. Jürgen Boehm for study coordination.

519 ColoCare Huntsman Cancer Institute: We thank all ColoCare study participants, the  
520 biorepository at Huntsman Cancer Institute for storage of the blood samples according to  
521 standardized SOPs, and Christy Warby for laboratory work. We thank Tyler Farr, Sarah  
522 Fischbuch and Debra Ma for data management and clinical follow-up data collection. We are  
523 very grateful for patient recruitment and follow-up by Elisa Santori, Hanna Omar-Payne and  
524 Marissa Grande, and Dr. Jürgen Boehm for study coordination.

525 ColoCare Fred Hutchinson Cancer Research Center: We thank all ColoCare study  
526 participants, the biorepository at Fred Hutchinson Cancer Research Center for storage of the  
527 blood samples according to standardized SOPs and the laboratory team for sample processing.  
528 We thank the ColoCare team for patient recruitment and follow-up and data management.

529 EnCoRe: We would like to thank all participants of the EnCoRe study and the health  
530 professionals in the three hospitals involved in the recruitment of participants of the study:  
531 Maastricht University Medical Center+, VieCuri Medical Center, and Zuyderland Medical  
532 Center. We would also like to thank the MEMIC center for data and information management  
533 for facilitating the logistic processes and data management of our study. Finally, we would  
534 like to thank the research dieticians and research assistant who are responsible for patient  
535 inclusion and follow-up, performing home visits, as well as data collection and processing.

536 CORSA: We kindly thank all individuals who agreed to participate in the CORSA study.  
537 Furthermore, we thank Thomas Bachleitner-Hofmann, Michael M. Bergmann, Judith Karner-  
538 Hanusch and Anton Stift (Department of Surgery, Medical University of Vienna), Karl Mach,  
539 Azita Deutinger-Permoon (KRAGES, Austria), and their co-workers for supporting CORSA  
540 recruitment. In addition, we would like to acknowledge Elisabeth Feik, Philipp Hofer and  
541 Cornelia Zöchmeister, for patient recruitment, sample processing, and follow-up.

1  
2  
3 542 COLON: The authors would like to thank the COLON participants, COLON investigators at  
4 543 Wageningen University & Research and the involved co-workers in the participating  
5 544 hospitals.

### 9 545 **Contributors**

10  
11 546 BG, MW, EK, PMU, CMU, AG, ABU, NH: conceived of the project, developed the overall  
12 547 research plan, and provided study oversight; BG, EHvR, ANH, SB, AJMRG, AU, JO, JLK,  
13 548 VD, RK, TG, TL, GK, TK, DEK, FJBvD, MJLB, AB, CIL, WMG, KV: conducted hands-on  
14 549 experiments and data collection; BG, EHvR, ANH, SB, AJMRG, AU, JO, JLK, VD, RK, TG,  
15 550 TL, GK, TK, DEK, FJBvD, CIL, WMG, KV, CMU: provided essential reagents or essential  
16 551 materials, databases, and so forth, necessary for the research; BG, EHvR, MJLB, AB, ANH,  
17 552 VD, SB: analyzed the data or performed the statistical analysis and made a major contribution  
18 553 to writing the paper; BG, MS, EK, PMU, ABU, MW, AG, CMU: had primary responsibility  
19 554 for the final content; all authors: reviewed the manuscript critically, provided feedback, and  
20 555 read and approved the final manuscript.

### 29 556 **Funding**

31  
32 557 The FOCUS Consortium is an ERA-NET (European Research Area Network) on Translational  
33 558 Cancer Research (TRANSCAN) project funded by the local research funding agencies  
34 559 (German Ministry of Education and Research, Germany, 01KT1503; Dutch Cancer Society  
35 560 with grant number UW2014-6877, the Netherlands; FWF Austrian Science Fund, Austria  
36 561 (API02104FW); Research Council Norway/Norwegian Cancer Society (RNC), Norway). The  
37 562 COLON study is further sponsored by Wereld Kanker Onderzoek Fonds, including funds  
38 563 from grant 2014/1179 as part of the World Cancer Research Fund International Regular Grant  
39 564 Programme; Alpe d'Huzes/Dutch Cancer Society (UM 2012-5653, UW 2013-5927, UW  
40 565 2015-7946); and ERA-NET on Translational Cancer Research (TRANSCAN/Dutch Cancer  
41 566 Society: UW2013-6397 and the Netherlands Organization for Health Research and  
42 567 Development (ZonMw), the Netherlands). The EnCoRe study was supported by grants from  
43 568 the Stichting Alpe d'HuZes within the research program 'Leven met kanker' of the Dutch  
44 569 Cancer Society (Grant No. UM-2010-4867 and UM-2012-5653), and by grants from  
45 570 Kankeronderzoekfonds Limburg as part of Health Foundation Limburg (Grant No.  
46 571 00005739), and by a grant from Wereld Kanker Onderzoek Fonds (WKOF), as part of the  
47 572 World Cancer Research Fund International grant programme (grant number 2016/1620).

1  
2  
3 573 Biljana Gigic was funded by the ERA-NET on Translational Cancer Research (TRANSCAN),  
4  
5 574 the German Ministry of Education and Research project 01KT1503, the National Institutes of  
6  
7 575 Health/National Cancer Institute (NHI/NCI) projects R01 CA189184 and U01 CA206110, the  
8  
9 576 Stiftung LebensBlicke, and the Matthias-Lackas Foundations. Eline H. van Roekel was  
10  
11 577 funded by the Wereld Kanker Onderzoek Fonds (WKOF), part of the World Cancer Research  
12  
13 578 Fund International grant programme (grant number 2016/1620). Martijn Bours was funded by  
14  
15 579 Alpe d'HuZes within the research program 'Leven met kanker' of the Dutch Cancer Society  
16  
17 580 (Grant No. UM-2012-5653). Dieuwertje E. Kok is supported by a Veni grant of the  
18  
19 581 Netherlands Organisation for Scientific Research (grant no. 016.Veni.188.082). Andreana N.  
20  
21 582 Holowatyj was supported by the National Institutes of Health under Ruth L. Kirschstein  
22  
23 583 National Research Service Award T32 HG008962 from the National Human Genome  
24  
25 584 Research Institute. Nina Habermann was funded by the TRANSCAN project 01KT1512,  
26  
27 585 Cornelia M. Ulrich and Jennifer Ose were funded by the Huntsman Cancer Foundation, and  
28  
29 586 NIH/NCI projects R01 CA189184, R01 CA207371, U01 CA206110, U01 CA206110 and P30  
30  
31 587 CA042014. NIH grants (P30 CA15704, U01 CA152756, R01 CA194663, R01 CA220004,  
32  
33 588 P01 CA077852), Rodger C. Haggitt Endowed Chair, R.A.C.E. Charities, Cottrell Family  
34  
35 589 Fund, Listwin Family Foundation, Seattle Translational Tumor Research program, Fred  
36  
37 590 Hutchinson Cancer Research Center (William M. Grady). Stefanie Brezina was funded by the  
38  
39 591 ERA-NET on Translational Cancer Research (TRANSCAN) project FOCUS I2104-B26 and  
40  
41 592 the ERA-NET on Translational Cancer Research (TRANSCAN) project MetaboCCC I 1578 –  
42  
43 593 B19. J.L. Koole was supported by Kankeronderzoekfonds Limburg as part of Health  
44  
45 594 Foundation Limburg (Grant No. 00005739). Victoria Damerell was funded by the German  
46  
47 595 Ministry of Education and Research project (01KD2101D).

#### 596 Disclaimer

597 The funder had no role in the design of the FOCUS consortium, or conduct of the study,  
598 collection, management, analysis, and interpretation of the data, preparation, review, or  
599 approval of the manuscript, or decision to submit the manuscript for publication.

#### 600 **Competing interests**

601 None declared.

#### 602 **Patient consent for publication**

603 Not applicable.

604

1  
2  
3 605 **Patient and public involvement**

4  
5 606 Patients and/or the public were not involved in the design, or conduct, or reporting, or  
6  
7 607 dissemination plans of this research.

8  
9 608 **Ethics approval**

10  
11 609 The Heidelberg ColoCare Study was approved by the Ethics Committee of the Medical  
12  
13 610 Faculty of Heidelberg (approval no. S-310/2001 and S-134/2016). The ColoCare Study at the  
14  
15 611 Huntsman Cancer Institute and the Fred Hutchinson Cancer Research Center were approved  
16  
17 612 by the respective IRBs (#77147 and #6407). For the CORSA study all subjects gave written  
18  
19 613 informed consent and the study was approved by the institutional review boards:  
20  
21 614 ‘Ethikkommission Burgenland’ (33/2010), by the ethical review committee of the Medical  
22  
23 615 University of Vienna (1160/2016) and by the “Ethikkommission der Stadt Wien” (EK 06-  
24  
25 616 150VK). The EnCoRe Study was approved by the Medical Ethics Committee of the  
26  
27 617 Maastricht University Hospital and Maastricht University (METC 11-3-075).

28 618 **Data availability**

29  
30 619 Data described in the manuscript, code book, and analytic code have been generated from  
31  
32 620 European-based consortia and as such are subject to regulations from multiple European  
33  
34 621 countries, which limit our availability to share data. The consortium’s funding has ended, and  
35  
36 622 no centralized staff is available to support  
37  
38 623 data requests. However, the FOCUS PIs have agreed to answer any queries or discuss  
39  
40 624 potential projects with anyone interested in future collaborative research. For further  
41  
42 625 questions please contact colocarestudy\_admin@hci.utah.edu.

43  
44 626  
45  
46  
47  
48  
49  
50  
51  
52  
53  
54  
55  
56  
57  
58  
59  
60

## References

1. Ferlay J, Colombet M, Soerjomataram I, et al. Estimating the global cancer incidence and mortality in 2018: GLOBOCAN sources and methods. *International journal of cancer Journal international du cancer* 2019;144(8):1941-53. doi: 10.1002/ijc.31937 [published Online First: 2018/10/24]
2. De Angelis R, Sant M, Coleman MP, et al. Cancer survival in Europe 1999-2007 by country and age: results of EURO CARE--5-a population-based study. *The Lancet Oncology* 2014;15(1):23-34. doi: 10.1016/S1470-2045(13)70546-1
3. Ferlay J, Colombet M, Soerjomataram I, et al. Cancer incidence and mortality patterns in Europe: Estimates for 40 countries and 25 major cancers in 2018. *European journal of cancer* 2018;103:356-87. doi: 10.1016/j.ejca.2018.07.005 [published Online First: 2018/08/14]
4. Gigic B, Boeing H, Toth R, et al. Associations Between Dietary Patterns and Longitudinal Quality of Life Changes in Colorectal Cancer Patients: The ColoCare Study. *Nutrition and cancer* 2017:1-10. doi: 10.1080/01635581.2018.1397707 [published Online First: 2017/12/16]
5. Velicer CM, Ulrich CM. Vitamin and mineral supplement use among US adults after cancer diagnosis: a systematic review. *Journal of clinical oncology : official journal of the American Society of Clinical Oncology* 2008;26(4):665-73. doi: 10.1200/JCO.2007.13.5905
6. Ulrich CM, Potter JD. Folate supplementation: too much of a good thing? *Cancer Epidemiol Biomarkers Prev* 2006;15(2):189-93. doi: 10.1158/1055-9965.EPI-152CO [published Online First: 2006/02/24]
7. Jatoi A, Williams B, Nichols F, et al. Is voluntary vitamin and mineral supplementation associated with better outcome in non-small cell lung cancer patients? Results from the Mayo Clinic lung cancer cohort. *Lung Cancer* 2005;49(1):77-84. doi: 10.1016/j.lungcan.2005.01.004 [published Online First: 2005/06/14]
8. Ferrucci LM, McCorkle R, Smith T, et al. Factors related to the use of dietary supplements by cancer survivors. *J Altern Complement Med* 2009;15(6):673-80. doi: 10.1089/acm.2008.0387
9. Caudill MA. Folate bioavailability: implications for establishing dietary recommendations and optimizing status. *The American journal of clinical nutrition* 2010;91(5):1455S-60S. doi: 10.3945/ajcn.2010.28674E [published Online First: 2010/03/12]
10. Ducker GS, Rabinowitz JD. One-Carbon Metabolism in Health and Disease. *Cell Metab* 2017;25(1):27-42. doi: 10.1016/j.cmet.2016.08.009 [published Online First: 2016/09/20]
11. Miller JW, Ulrich CM. Folic acid and cancer--where are we today? *Lancet* 2013;381(9871):974-6. doi: 10.1016/S0140-6736(13)60110-5 [published Online First: 2013/01/29]
12. Kim YI. Folate and colorectal cancer: an evidence-based critical review. *Mol Nutr Food Res* 2007;51(3):267-92. doi: 10.1002/mnfr.200600191 [published Online First: 2007/02/14]
13. Ulrich CM, Toriola AT, Siegel EM, et al. Plasma 25-hydroxyvitamin D3, folate and vitamin B12 biomarkers among international colorectal cancer patients: a pilot study. *J Nutr Sci* 2013;2:e9. doi: 10.1017/jns.2012.28
14. Cole BF, Baron JA, Sandler RS, et al. Folic acid for the prevention of colorectal adenomas: a randomized clinical trial. *Jama* 2007;297(21):2351-9. doi: 10.1001/jama.297.21.2351 [published Online First: 2007/06/07]
15. Lawrance AK, Deng L, Rozen R. Methylene tetrahydrofolate reductase deficiency and low dietary folate reduce tumorigenesis in Apc min/+ mice. *Gut* 2009;58(6):805-11. doi: 10.1136/gut.2007.143107 [published Online First: 2009/01/29]
16. Lindzon GM, Medline A, Sohn KJ, et al. Effect of folic acid supplementation on the progression of colorectal aberrant crypt foci. *Carcinogenesis* 2009;30(9):1536-43. doi: 10.1093/carcin/bgp152 [published Online First: 2009/06/23]
17. Mason JB. Folate, cancer risk, and the Greek god, Proteus: a tale of two chameleons. *Nutrition reviews* 2009;67(4):206-12. doi: 10.1111/j.1753-4887.2009.00190.x [published Online First: 2009/04/02]
18. Ulrich CM, Miller JW. Folate and health: present and future. *Mol Nutr Food Res* 2013;57(4):561. doi: 10.1002/mnfr.201370034 [published Online First: 2013/04/05]
19. Choi JH, Yates Z, Martin C, et al. Gene-Nutrient Interaction between Folate and Dihydrofolate Reductase in Risk for Adenomatous Polyp Occurrence: A Preliminary Report. *J Nutr Sci*

- 1  
2  
3 682 *Vitaminol (Tokyo)* 2015;61(6):455-9. doi: 10.3177/jnsv.61.455 [published Online First:  
4 683 2016/02/16]
- 5 684 20. Sawaengsri H, Wang J, Reginaldo C, et al. High folic acid intake reduces natural killer cell  
6 685 cytotoxicity in aged mice. *J Nutr Biochem* 2016;30:102-7. doi: 10.1016/j.jnutbio.2015.12.006  
7 686 [published Online First: 2016/03/26]
- 8 687 21. Ulrich CM, Gigic B, Bohm J, et al. The ColoCare Study: A Paradigm of Transdisciplinary Science  
9 688 in Colorectal Cancer Outcomes. *Cancer Epidemiol Biomarkers Prev* 2019;28(3):591-601. doi:  
10 689 10.1158/1055-9965.EPI-18-0773 [published Online First: 2018/12/14]
- 11 690 22. Winkels RM, Heine-Broring RC, van Zutphen M, et al. The COLON study: Colorectal cancer:  
12 691 Longitudinal, Observational study on Nutritional and lifestyle factors that may influence  
13 692 colorectal tumour recurrence, survival and quality of life. *BMC cancer* 2014;14:374. doi:  
14 693 10.1186/1471-2407-14-374 [published Online First: 2014/06/03]
- 15 694 23. van Roekel EH, Bours MJ, de Brouwer CP, et al. The applicability of the international  
16 695 classification of functioning, disability, and health to study lifestyle and quality of life of  
17 696 colorectal cancer survivors. *Cancer Epidemiol Biomarkers Prev* 2014;23(7):1394-405. doi:  
18 697 10.1158/1055-9965.EPI-13-1144 [published Online First: 2014/05/08]
- 19 698 24. Fayers P, Bottomley A, Group EQoL, et al. Quality of life research within the EORTC-the  
20 699 EORTC QLQ-C30. European Organisation for Research and Treatment of Cancer. *European*  
21 700 *journal of cancer* 2002;38 Suppl 4:S125-33.
- 22 701 25. Postma TJ, Aaronson NK, Heimans JJ, et al. The development of an EORTC quality of life  
23 702 questionnaire to assess chemotherapy-induced peripheral neuropathy: the QLQ-CIPN20.  
24 703 *European journal of cancer* 2005;41(8):1135-9. doi: 10.1016/j.ejca.2005.02.012
- 25 704 26. Molloy AM, Scott JM. Microbiological assay for serum, plasma, and red cell folate using  
26 705 cryopreserved, microtiter plate method. *Methods Enzymol* 1997;281:43-53. [published Online  
27 706 First: 1997/01/01]
- 28 707 27. Kelleher BP, Broin SD. Microbiological assay for vitamin B12 performed in 96-well microtitre  
29 708 plates. *J Clin Pathol* 1991;44(7):592-5. [published Online First: 1991/07/01]
- 30 709 28. Hannisdal R, Ueland PM, Svardal A. Liquid chromatography-tandem mass spectrometry analysis  
31 710 of folate and folate catabolites in human serum. *Clin Chem* 2009;55(6):1147-54. doi:  
32 711 10.1373/clinchem.2008.114389 [published Online First: 2009/04/11]
- 33 712 29. Midttun O, Hustad S, Ueland PM. Quantitative profiling of biomarkers related to B-vitamin status,  
34 713 tryptophan metabolism and inflammation in human plasma by liquid chromatography/tandem  
35 714 mass spectrometry. *Rapid Commun Mass Spectrom* 2009;23(9):1371-9. doi:  
36 715 10.1002/rcm.4013 [published Online First: 2009/04/02]
- 37 716 30. Midttun O, Kvalheim G, Ueland PM. High-throughput, low-volume, multianalyte quantification of  
38 717 plasma metabolites related to one-carbon metabolism using HPLC-MS/MS. *Anal Bioanal*  
39 718 *Chem* 2013;405(6):2009-17. doi: 10.1007/s00216-012-6602-6 [published Online First:  
40 719 2012/12/13]
- 41 720 31. Midttun O, McCann A, Aarseth O, et al. Combined Measurement of 6 Fat-Soluble Vitamins and  
42 721 26 Water-Soluble Functional Vitamin Markers and Amino Acids in 50 µL of Serum or  
43 722 Plasma by High-Throughput Mass Spectrometry. *Anal Chem* 2016;88(21):10427-36. doi:  
44 723 10.1021/acs.analchem.6b02325 [published Online First: 2016/11/02]
- 45 724 32. Meyer K, Ueland PM. Targeted quantification of C-reactive protein and cystatin c and its variants  
46 725 by immuno-MALDI-MS. *Anal Chem* 2014;86(12):5807-14. doi: 10.1021/ac500704y  
47 726 [published Online First: 2014/05/23]
- 48 727 33. Geijsen A, Ulvik A, Gigic B, et al. Circulating Folate and Folic Acid Concentrations: Associations  
49 728 With Colorectal Cancer Recurrence and Survival. *JNCI Cancer Spectr* 2020;4(5):pkaa051.  
50 729 doi: 10.1093/jncics/pkaa051 [published Online First: 2020/11/03]
- 51 730 34. Kiblawi R, Holowatyj AN, Gigic B, et al. One-carbon metabolites, B-vitamins and associations  
52 731 with systemic inflammation and angiogenesis biomarkers among colorectal cancer patients:  
53 732 results from the ColoCare Study. *The British journal of nutrition* 2020:1-32. doi:  
54 733 10.1017/S0007114520000422 [published Online First: 2020/02/06]
- 55 734 35. Koole JL, Bours MJL, Geijsen A, et al. Circulating B-vitamin biomarkers and B-vitamin  
56 735 supplement use in relation to quality of life in patients with colorectal cancer: results from the  
57 736 FOCUS consortium. *The American journal of clinical nutrition* 2021 doi:  
58 737 10.1093/ajcn/nqaa422 [published Online First: 2021/03/06]

- 1  
2  
3 738 36. Schrotz-King P, Dölp K, Paskow MJ, et al. Dietary Supplement Use among German Colorectal  
4 739 Cancer Patients: the ColoCare Study: AACR/MEG Post-GWAS Horizons in Molecular  
5 740 Epidemiology: Digging Deeper into the Environment., 2012.  
6 741 37. Lao VV, Welsh P, Luo Y, et al. Altered RECQ Helicase Expression in Sporadic Primary  
7 742 Colorectal Cancers. *Transl Oncol* 2013;6(4):458-69.  
8 743 38. Luo Y, Kaz AM, Kanngurn S, et al. NTRK3 is a potential tumor suppressor gene commonly  
9 744 inactivated by epigenetic mechanisms in colorectal cancer. *PLoS Genet* 2013;9(7):e1003552.  
10 745 doi: 10.1371/journal.pgen.1003552  
11 746 39. Luo Y, Tsuchiya KD, Il Park D, et al. RET is a potential tumor suppressor gene in colorectal  
12 747 cancer. *Oncogene* 2013;32(16):2037-47. doi: 10.1038/onc.2012.225  
13 748 40. Sherwood AM, Emerson RO, Scherer D, et al. Tumor-infiltrating lymphocytes in colorectal  
14 749 tumors display a diversity of T cell receptor sequences that differ from the T cells in adjacent  
15 750 mucosal tissue. *Cancer Immunol Immunother* 2013;62(9):1453-61. doi: 10.1007/s00262-013-  
16 751 1446-2  
17 752 41. Skender S, Bohm J, Schrotz-King P, et al. Plasma 25-Hydroxyvitamin D3 Levels in Colorectal  
18 753 Cancer Patients and Associations with Physical Activity. *Nutrition and cancer*  
19 754 2017;69(2):229-37. doi: 10.1080/01635581.2017.1265131  
20 755 42. Luo Y, Wong CJ, Kaz AM, et al. Differences in DNA methylation signatures reveal multiple  
21 756 pathways of progression from adenoma to colorectal cancer. *Gastroenterology*  
22 757 2014;147(2):418-29 e8. doi: 10.1053/j.gastro.2014.04.039  
23 758 43. Barrow TM, Klett H, Toth R, et al. Smoking is associated with hypermethylation of the APC 1A  
24 759 promoter in colorectal cancer: the ColoCare Study. *J Pathol* 2017;243(3):366-75. doi:  
25 760 10.1002/path.4955 [published Online First: 2017/08/10]  
26 761 44. Yu M, Carter KT, Makar KW, et al. MethyLight droplet digital PCR for detection and absolute  
27 762 quantification of infrequently methylated alleles. *Epigenetics* 2015;10(9):803-9. doi:  
28 763 10.1080/15592294.2015.1068490  
29 764 45. Klett H, Balavarca Y, Toth R, et al. Robust prediction of gene regulation in colorectal cancer  
30 765 tissues from DNA methylation profiles. *Epigenetics* 2018;13(4):386-97. doi:  
31 766 10.1080/15592294.2018.1460034 [published Online First: 2018/04/27]  
32 767 46. Ristau J, Staffa J, Schrotz-King P, et al. Suitability of circulating miRNAs as potential prognostic  
33 768 markers in colorectal cancer. *Cancer Epidemiol Biomarkers Prev* 2014;23(12):2632-7. doi:  
34 769 10.1158/1055-9965.EPI-14-0556  
35 770 47. Yuan Z, Baker K, Redman MW, et al. Dynamic plasma microRNAs are biomarkers for prognosis  
36 771 and early detection of recurrence in colorectal cancer. *British journal of cancer*  
37 772 2017;117(8):1202-10. doi: 10.1038/bjc.2017.266 [published Online First: 2017/08/16]  
38 773 48. Zeller G, Tap J, Voigt AY, et al. Potential of fecal microbiota for early-stage detection of  
39 774 colorectal cancer. *Mol Syst Biol* 2014;10:766. doi: 10.15252/msb.20145645  
40 775 49. Thomas AM, Manghi P, Asnicar F, et al. Metagenomic analysis of colorectal cancer datasets  
41 776 identifies cross-cohort microbial diagnostic signatures and a link with choline degradation.  
42 777 *Nat Med* 2019;25(4):667-78. doi: 10.1038/s41591-019-0405-7 [published Online First:  
43 778 2019/04/03]  
44 779 50. Wirbel J, Pyl PT, Kartal E, et al. Meta-analysis of fecal metagenomes reveals global microbial  
45 780 signatures that are specific for colorectal cancer. *Nat Med* 2019;25(4):679-89. doi:  
46 781 10.1038/s41591-019-0406-6 [published Online First: 2019/04/03]  
47 782 51. Liesenfeld DB, Grapov D, Fahrman JF, et al. Metabolomics and transcriptomics identify pathway  
48 783 differences between visceral and subcutaneous adipose tissue in colorectal cancer patients: the  
49 784 ColoCare study. *The American journal of clinical nutrition* 2015;102(2):433-43. doi:  
50 785 10.3945/ajcn.114.103804  
51 786 52. Liesenfeld DB, Habermann N, Toth R, et al. Changes in urinary metabolic profiles of colorectal  
52 787 cancer patients enrolled in a prospective cohort study (ColoCare). *Metabolomics*  
53 788 2015;11(4):998-1012. doi: 10.1007/s11306-014-0758-3 [published Online First: 2015/08/01]  
54 789 53. Ose J, Gigic B, Lin T, et al. Multiplatform Urinary Metabolomics Profiling to Discriminate  
55 790 Cachectic from Non-Cachectic Colorectal Cancer Patients: Pilot Results from the ColoCare  
56 791 Study. *Metabolites* 2019;9(9) doi: 10.3390/metabo9090178 [published Online First:  
57 792 2019/09/11]



1  
2  
3  
4  
5  
6  
7  
8  
9  
10  
11  
12  
13  
14  
15  
16  
17  
18  
19  
20  
21  
22  
23  
24  
25  
26  
27  
28  
29  
30  
31  
32  
33  
34  
35  
36  
37  
38  
39  
40  
41  
42  
43  
44  
45  
46  
47  
48  
49  
50  
51  
52  
53  
54  
55  
56  
57  
58  
59  
60

- 793 54. Bohm J, Pianka F, Stuttgart N, et al. Discovery of novel plasma proteins as biomarkers for the  
794 development of incisional hernias after midline incision in patients with colorectal cancer: The  
795 ColoCare study. *Surgery* 2017;161(3):808-17. doi: 10.1016/j.surg.2016.08.025
- 796 55. Gong J, Hutter CM, Newcomb PA, et al. Genome-Wide Interaction Analyses between Genetic  
797 Variants and Alcohol Consumption and Smoking for Risk of Colorectal Cancer. *PLoS Genet*  
798 2016;12(10):e1006296. doi: 10.1371/journal.pgen.1006296 [published Online First:  
799 2016/10/11]
- 800 56. Delphan M, Lin T, Liesenfeld DB, et al. Associations of branched-chain amino acids with  
801 parameters of energy balance and survival in colorectal cancer patients: Results from the  
802 ColoCare Study. *Metabolomics* 2018;2018(14) doi: 10.1007/s11306-017-1314-8 [published  
803 Online First: 2018/05/01]
- 804 57. Rosenthal EA, Shirts BH, Amendola LM, et al. Rare loss of function variants in candidate genes  
805 and risk of colorectal cancer. *Hum Genet* 2018 doi: 10.1007/s00439-018-1938-4 [published  
806 Online First: 2018/09/30]
- 807 58. Nattenmueller J, Hoegenauer H, Boehm J, et al. CT-based compartmental quantification of adipose  
808 tissue versus body metrics in colorectal cancer patients. *Eur Radiol* 2016;26(11):4131-40. doi:  
809 10.1007/s00330-016-4231-8
- 810 59. Ozoya OO, Siegel EM, Srikumar T, et al. Quantitative Assessment of Visceral Obesity and  
811 Postoperative Colon Cancer Outcomes. *J Gastrointest Surg* 2017;21(3):534-42. doi:  
812 10.1007/s11605-017-3362-9 [published Online First: 2017/01/20]
- 813 60. van Zutphen M, Geelen A, Boshuizen HC, et al. Pre-to-post diagnosis weight trajectories in  
814 colorectal cancer patients with non-metastatic disease. *Supportive care in cancer : official*  
815 *journal of the Multinational Association of Supportive Care in Cancer* 2019;27(4):1541-49.  
816 doi: 10.1007/s00520-018-4560-z [published Online First: 2018/11/30]
- 817 61. van Zutphen M, Boshuizen HC, Kok DE, et al. Colorectal cancer survivors only marginally change  
818 their overall lifestyle in the first 2 years following diagnosis. *J Cancer Surviv* 2019;13(6):956-  
819 67. doi: 10.1007/s11764-019-00812-7 [published Online First: 2019/10/28]
- 820 62. Wesselink E, Bours MJL, de Wilt JHW, et al. Chemotherapy and vitamin D supplement use are  
821 determinants of serum 25-hydroxyvitamin D levels during the first six months after colorectal  
822 cancer diagnosis. *J Steroid Biochem Mol Biol* 2020;199:105577. doi:  
823 10.1016/j.jsbmb.2020.105577 [published Online First: 2020/01/10]
- 824 63. Wesselink E, Kok DE, de Wilt JHW, et al. Sufficient 25-Hydroxyvitamin D Levels 2 Years after  
825 Colorectal Cancer Diagnosis are Associated with a Lower Risk of All-cause Mortality. *Cancer*  
826 *Epidemiol Biomarkers Prev* 2021;30(4):765-73. doi: 10.1158/1055-9965.EPI-20-1388  
827 [published Online First: 2021/02/04]
- 828 64. Wesselink E, Balvers M, Bours MJL, et al. The association between circulating levels of vitamin  
829 D and inflammatory markers in the first 2 years after colorectal cancer diagnosis. *Therap Adv*  
830 *Gastroenterol* 2020;13:1756284820923922. doi: 10.1177/1756284820923922 [published  
831 Online First: 2020/06/18]
- 832 65. Wesselink E, Kok DE, Bours MJL, et al. Vitamin D, magnesium, calcium, and their interaction in  
833 relation to colorectal cancer recurrence and all-cause mortality. *The American journal of*  
834 *clinical nutrition* 2020;111(5):1007-17. doi: 10.1093/ajcn/nqaa049 [published Online First:  
835 2020/03/20]
- 836 66. van Zutphen M, Winkels RM, van Duijnhoven FJ, et al. An increase in physical activity after  
837 colorectal cancer surgery is associated with improved recovery of physical functioning: a  
838 prospective cohort study. *BMC cancer* 2017;17(1):74. doi: 10.1186/s12885-017-3066-2  
839 [published Online First: 2017/01/27]
- 840 67. Wesselink E, van Baar H, van Zutphen M, et al. Inflammation Is a Mediating Factor in the  
841 Association between Lifestyle and Fatigue in Colorectal Cancer Patients. *Cancers (Basel)*  
842 2020;12(12) doi: 10.3390/cancers12123701 [published Online First: 2020/12/16]
- 843 68. Wesselink E, Staritsky LE, van Zutphen M, et al. The association between the adapted dietary  
844 inflammatory index and colorectal cancer recurrence and all-cause mortality. *Clin Nutr*  
845 2021;40(6):4436-43. doi: 10.1016/j.clnu.2021.01.004 [published Online First: 2021/01/23]
- 846 69. van Baar H, Winkels RM, Brouwer JGM, et al. Associations of Abdominal Skeletal Muscle Mass,  
847 Fat Mass, and Mortality among Men and Women with Stage I-III Colorectal Cancer. *Cancer*

- 1  
2  
3 848 *Epidemiol Biomarkers Prev* 2020;29(5):956-65. doi: 10.1158/1055-9965.EPI-19-1134  
4 849 [published Online First: 2020/03/07]
- 5 850 70. van Baar H, Beijer S, Bours MJL, et al. Low radiographic muscle density is associated with lower  
6 851 overall and disease-free survival in early-stage colorectal cancer patients. *J Cancer Res Clin*  
7 852 *Oncol* 2018;144(11):2139-47. doi: 10.1007/s00432-018-2736-z [published Online First:  
8 853 2018/08/19]
- 9 854 71. van Baar H, Bours MJL, Beijer S, et al. Body composition and its association with fatigue in the  
10 855 first 2 years after colorectal cancer diagnosis. *J Cancer Surviv* 2021;15(4):597-606. doi:  
11 856 10.1007/s11764-020-00953-0 [published Online First: 2020/10/18]
- 12 857 72. Winkels RM, van Brakel L, van Baar H, et al. Are Ergothioneine Levels in Blood Associated with  
13 858 Chronic Peripheral Neuropathy in Colorectal Cancer Patients Who Underwent Chemotherapy?  
14 859 *Nutrition and cancer* 2020;72(3):451-59. doi: 10.1080/01635581.2019.1637005 [published  
15 860 Online First: 2019/07/13]
- 16 861 73. Wesselink E, Winkels RM, van Baar H, et al. Dietary Intake of Magnesium or Calcium and  
17 862 Chemotherapy-Induced Peripheral Neuropathy in Colorectal Cancer Patients. *Nutrients*  
18 863 2018;10(4) doi: 10.3390/nu10040398 [published Online First: 2018/03/24]
- 19 864 74. Postma EM, Kok DE, de Graaf C, et al. Chemosensory perception and food preferences in  
20 865 colorectal cancer patients undergoing adjuvant chemotherapy. *Clin Nutr ESPEN* 2020;40:242-  
21 866 51. doi: 10.1016/j.clnesp.2020.09.012 [published Online First: 2020/11/14]
- 22 867 75. Hofer P, Hagmann M, Brezina S, et al. Bayesian and frequentist analysis of an Austrian genome-  
23 868 wide association study of colorectal cancer and advanced adenomas. *Oncotarget*  
24 869 2017;8(58):98623-34. doi: 10.18632/oncotarget.21697 [published Online First: 2017/12/13]
- 25 870 76. Schmit SL, Edlund CK, Schumacher FR, et al. Novel Common Genetic Susceptibility Loci for  
26 871 Colorectal Cancer. *Journal of the National Cancer Institute* 2019;111(2):146-57. doi:  
27 872 10.1093/jnci/djy099 [published Online First: 2018/06/20]
- 28 873 77. Schafmayer C, Harrison JW, Buch S, et al. Genome-wide association analysis of diverticular  
29 874 disease points towards neuromuscular, connective tissue and epithelial pathomechanisms. *Gut*  
30 875 2019 doi: 10.1136/gutjnl-2018-317619 [published Online First: 2019/01/21]
- 31 876 78. Zochmeister C, Brezina S, Hofer P, et al. Leukocyte telomere length throughout the continuum of  
32 877 colorectal carcinogenesis. *Oncotarget* 2018;9(17):13582-92. doi: 10.18632/oncotarget.24431  
33 878 [published Online First: 2018/03/24]
- 34 879 79. Jiraskova K, Hughes DJ, Brezina S, et al. Functional Polymorphisms in DNA Repair Genes Are  
35 880 Associated with Sporadic Colorectal Cancer Susceptibility and Clinical Outcome. *Int J Mol*  
36 881 *Sci* 2018;20(1) doi: 10.3390/ijms20010097 [published Online First: 2018/12/29]
- 37 882 80. Luna Coronell JA, Sergelen K, Hofer P, et al. The Immunome of Colon Cancer: Functional In  
38 883 Silico Analysis of Antigenic Proteins Deduced from IgG Microarray Profiling. *Genomics*  
39 884 *Proteomics Bioinformatics* 2018;16(1):73-84. doi: 10.1016/j.gpb.2017.10.002 [published  
40 885 Online First: 2018/03/06]
- 41 886 81. Geijsen A, van Roekel EH, van Duijnhoven FJB, et al. Plasma metabolites associated with  
42 887 colorectal cancer stage: Findings from an international consortium. *International journal of*  
43 888 *cancer Journal international du cancer* 2019 doi: 10.1002/ijc.32666 [published Online First:  
44 889 2019/09/10]
- 45 890 82. Van Roekel EH, Bours MJ, Breedveld-Peters JJ, et al. Light Physical Activity Is Associated with  
46 891 Quality of Life after Colorectal Cancer. *Med Sci Sports Exerc* 2015;47(12):2493-503. doi:  
47 892 10.1249/MSS.0000000000000698 [published Online First: 2015/05/15]
- 48 893 83. van Roekel EH, Winkler EA, Bours MJ, et al. Associations of sedentary time and patterns of  
49 894 sedentary time accumulation with health-related quality of life in colorectal cancer survivors.  
50 895 *Prev Med Rep* 2016;4:262-9. doi: 10.1016/j.pmedr.2016.06.022 [published Online First:  
51 896 2016/07/16]
- 52 897 84. van Roekel EH, Bours MJ, Breedveld-Peters JJ, et al. Modeling how substitution of sedentary  
53 898 behavior with standing or physical activity is associated with health-related quality of life in  
54 899 colorectal cancer survivors. *Cancer causes & control : CCC* 2016;27(4):513-25. doi:  
55 900 10.1007/s10552-016-0725-6 [published Online First: 2016/02/20]
- 56 901 85. van Roekel EH, Duchateau J, Bours MJL, et al. Longitudinal associations of light-intensity  
57 902 physical activity with quality of life, functioning and fatigue after colorectal cancer. *Quality of*  
58 903 *life research : an international journal of quality of life aspects of treatment, care and*

- 1  
2  
3 904 *rehabilitation* 2020;29(11):2987-98. doi: 10.1007/s11136-020-02566-7 [published Online  
4 905 First: 2020/07/04]
- 5 906 86. Breedveld-Peters JJJ, Koole JL, Muller-Schulte E, et al. Colorectal cancers survivors' adherence to  
6 907 lifestyle recommendations and cross-sectional associations with health-related quality of life.  
7 908 *The British journal of nutrition* 2018;120(2):188-97. doi: 10.1017/S0007114518000661  
8 909 [published Online First: 2018/04/17]
- 9 910 87. van Roekel EH, Bours MJL, Te Molder MEM, et al. Associations of adipose and muscle tissue  
10 911 parameters at colorectal cancer diagnosis with long-term health-related quality of life. *Quality*  
11 912 *of life research : an international journal of quality of life aspects of treatment, care and*  
12 913 *rehabilitation* 2017;26(7):1745-59. doi: 10.1007/s11136-017-1539-z [published Online First:  
13 914 2017/03/21]
- 14 915 88. van Heinsbergen M, Konsten JL, Bours MJL, et al. Preoperative handgrip strength is not  
15 916 associated with complications and health-related quality of life after surgery for colorectal  
16 917 cancer. *Sci Rep* 2020;10(1):13005. doi: 10.1038/s41598-020-69806-1 [published Online First:  
17 918 2020/08/05]
- 18 919 89. Koole JL, Bours MJL, Breedveld-Peters JJJ, et al. Is dietary supplement use longitudinally  
19 920 associated with fatigue in stage I-III colorectal cancer survivors? *Clin Nutr* 2019 doi:  
20 921 10.1016/j.clnu.2018.12.037 [published Online First: 2019/02/17]
- 21 922 90. Breedveld-Peters JJJ, Bours MJL, Cords CI, et al. The impact of participation restrictions on  
22 923 everyday life in long-term colorectal cancer survivors in the EnCoRe study: A mixed-method  
23 924 study. *Eur J Oncol Nurs* 2020;45:101724. doi: 10.1016/j.ejon.2020.101724 [published Online  
24 925 First: 2020/02/12]
- 25 926 91. Koole JL, Bours MJL, Breedveld-Peters JJJ, et al. Evaluating the Validity of a Food Frequency  
26 927 Questionnaire in Comparison with a 7-Day Dietary Record for Measuring Dietary Intake in a  
27 928 Population of Survivors of Colorectal Cancer. *J Acad Nutr Diet* 2020;120(2):245-57. doi:  
28 929 10.1016/j.jand.2019.09.008 [published Online First: 2019/12/07]
- 29 930 92. Revesz D, van Kuijk SMJ, Mols F, et al. Development and internal validation of prediction models  
30 931 for colorectal cancer survivors to estimate the 1-year risk of low health-related quality of life  
31 932 in multiple domains. *BMC Med Inform Decis Mak* 2020;20(1):54. doi: 10.1186/s12911-020-  
32 933 1064-9 [published Online First: 2020/03/14]
- 33 934 93. Ose J, Botma A, Balavarca Y, et al. Pathway analysis of genetic variants in folate-mediated one-  
34 935 carbon metabolism-related genes and survival in a prospectively followed cohort of colorectal  
35 936 cancer patients. *Cancer Med* 2018 doi: 10.1002/cam4.1407 [published Online First:  
36 937 2018/05/31]
- 37 938 94. Perry CA, Renna SA, Khitun E, et al. Ethnicity and race influence the folate status response to  
38 939 controlled folate intakes in young women. *The Journal of nutrition* 2004;134(7):1786-92. doi:  
39 940 10.1093/jn/134.7.1786 [published Online First: 2004/07/01]
- 40 941 95. Nohr EA, Liew Z. How to investigate and adjust for selection bias in cohort studies. *Acta Obstet*  
41 942 *Gynecol Scand* 2018;97(4):407-16. doi: 10.1111/aogs.13319 [published Online First:  
42 943 2018/02/08]

944

1  
2  
3 945 **Figure legends**  
4

5 946 **Figure 1** FOCUS Consortium design  
6  
7  
8  
9  
10  
11  
12  
13  
14  
15  
16  
17  
18  
19  
20  
21  
22  
23  
24  
25  
26  
27  
28  
29  
30  
31  
32  
33  
34  
35  
36  
37  
38  
39  
40  
41  
42  
43  
44  
45  
46  
47  
48  
49  
50  
51  
52  
53  
54  
55  
56  
57  
58  
59  
60

For peer review only

1  
2  
3  
4  
5  
6  
7  
8  
9  
10  
11  
12  
13  
14  
15  
16  
17  
18  
19  
20  
21  
22  
23  
24  
25  
26  
27  
28  
29  
30  
31  
32  
33  
34  
35  
36  
37  
38  
39  
40  
41  
42  
43  
44  
45  
46  
47  
48  
49  
50  
51  
52  
53  
54  
55  
56



# BMJ Open

**Cohort profile: Biomarkers related to folate-dependent one-carbon metabolism in colorectal cancer recurrence and survival:  
The FOCUS Consortium**

|                               |                                                                                                                                                                                                                                                                                                                                                                                                                                                                                                                                                                                                                                                                                                                                                                                                                                                                                                                                                                                                                                                                                                                                                                                                                                                                                                                                                                                                                                                                                                                                                                                                                                                                                                                                                                                                                                                                                                                                                                                                                                                                                                                                                            |
|-------------------------------|------------------------------------------------------------------------------------------------------------------------------------------------------------------------------------------------------------------------------------------------------------------------------------------------------------------------------------------------------------------------------------------------------------------------------------------------------------------------------------------------------------------------------------------------------------------------------------------------------------------------------------------------------------------------------------------------------------------------------------------------------------------------------------------------------------------------------------------------------------------------------------------------------------------------------------------------------------------------------------------------------------------------------------------------------------------------------------------------------------------------------------------------------------------------------------------------------------------------------------------------------------------------------------------------------------------------------------------------------------------------------------------------------------------------------------------------------------------------------------------------------------------------------------------------------------------------------------------------------------------------------------------------------------------------------------------------------------------------------------------------------------------------------------------------------------------------------------------------------------------------------------------------------------------------------------------------------------------------------------------------------------------------------------------------------------------------------------------------------------------------------------------------------------|
| Journal:                      | <i>BMJ Open</i>                                                                                                                                                                                                                                                                                                                                                                                                                                                                                                                                                                                                                                                                                                                                                                                                                                                                                                                                                                                                                                                                                                                                                                                                                                                                                                                                                                                                                                                                                                                                                                                                                                                                                                                                                                                                                                                                                                                                                                                                                                                                                                                                            |
| Manuscript ID                 | bmjopen-2022-062930.R2                                                                                                                                                                                                                                                                                                                                                                                                                                                                                                                                                                                                                                                                                                                                                                                                                                                                                                                                                                                                                                                                                                                                                                                                                                                                                                                                                                                                                                                                                                                                                                                                                                                                                                                                                                                                                                                                                                                                                                                                                                                                                                                                     |
| Article Type:                 | Cohort profile                                                                                                                                                                                                                                                                                                                                                                                                                                                                                                                                                                                                                                                                                                                                                                                                                                                                                                                                                                                                                                                                                                                                                                                                                                                                                                                                                                                                                                                                                                                                                                                                                                                                                                                                                                                                                                                                                                                                                                                                                                                                                                                                             |
| Date Submitted by the Author: | 05-Oct-2022                                                                                                                                                                                                                                                                                                                                                                                                                                                                                                                                                                                                                                                                                                                                                                                                                                                                                                                                                                                                                                                                                                                                                                                                                                                                                                                                                                                                                                                                                                                                                                                                                                                                                                                                                                                                                                                                                                                                                                                                                                                                                                                                                |
| Complete List of Authors:     | <p>Gigic, Biljana; University Hospital Heidelberg, Department of General, Visceral and Transplantation Surgery<br/> van Roekel, Eline ; Maastricht University, Department of Epidemiology<br/> Holowatyj, Andreana; Vanderbilt University Medical Center, Medicine; Vanderbilt-Ingram Cancer Center,<br/> Brezina, Stefanie; Medical University of Vienna, Institute of Cancer Research, Department of Medicine I<br/> Geijsen, Anne; Wageningen University &amp; Research, Division of Human Nutrition and Health<br/> Ulvik, Arve; BEVITAL<br/> Ose, Jennifer; Huntsman Cancer Institute; University of Utah, Department of Population Health Sciences<br/> Koole, Janna L.; Maastricht University, Department of Epidemiology<br/> Damerell, Victoria; University Hospital Heidelberg, Department of General, Visceral and Transplantation Surgery<br/> Kiblawi, Rama; Huntsman Cancer Institute; University of Utah, Department of Population Health Sciences<br/> Gumpenberger, Tanja; Medical University of Vienna, Institute of Cancer Research, Department of Medicine I<br/> Lin, Tengda; Huntsman Cancer Institute; University of Utah, Department of Population Health Sciences<br/> Kvalheim, Gry; BEVITAL<br/> Koelsch, Torsten; Heidelberg University Hospital, Department of General, Visceral and Transplantation Surgery<br/> Kok, Dieuwertje; Wageningen University &amp; Research, Division of Human Nutrition and Health<br/> van Duijnhoven, Franzel J; Wageningen University &amp; Research, Division of Human Nutrition and Health<br/> Bours, Martijn J.; Maastricht University, Department of Epidemiology<br/> Baierl, Andreas; University of Vienna, Department of Statistics and Operations Research<br/> Li, Christopher I.; Fred Hutchinson Cancer Research Center<br/> Grady, William; Fred Hutchinson Cancer Research Center; University of Washington School of Medicine, Department of Medicine<br/> Vickers, Kathy; Fred Hutchinson Cancer Research Center<br/> Habermann, Nina; European Molecular Biology Laboratory (EMBL), Genome Biology<br/> Schneider, Martin; Heidelberg University Hospital, Department of</p> |

|                                                    |                                                                                                                                                                                                                                                                                                                                                                                                                                                                                                                                                                                                                                                                                  |
|----------------------------------------------------|----------------------------------------------------------------------------------------------------------------------------------------------------------------------------------------------------------------------------------------------------------------------------------------------------------------------------------------------------------------------------------------------------------------------------------------------------------------------------------------------------------------------------------------------------------------------------------------------------------------------------------------------------------------------------------|
|                                                    | General, Visceral and Transplantation Surgery<br>Kampman, Ellen; Wageningen University & Research, Division of Human Nutrition and Health<br>Ueland, Per Magne; BEVITAL<br>Ulrich, Alexis; Städtische Kliniken Neuss, Lukaskrankenhaus GmbH, Surgical Department I; University Hospital Heidelberg, Department of General, Visceral and Transplantation Surgery<br>Weijenberg, Matty ; Maastricht University, Department of Epidemiology<br>Gsur, Andrea; Medical University of Vienna, Institute of Cancer Research, Department of Medicine I<br>Ulrich, Cornelia; Huntsman Cancer Institute, Population Sciences; University of Utah, Department of Population Health Sciences |
| <b>&lt;b&gt;Primary Subject Heading&lt;/b&gt;:</b> | Epidemiology                                                                                                                                                                                                                                                                                                                                                                                                                                                                                                                                                                                                                                                                     |
| Secondary Subject Heading:                         | Nutrition and metabolism, Oncology, Public health                                                                                                                                                                                                                                                                                                                                                                                                                                                                                                                                                                                                                                |
| Keywords:                                          | Epidemiology < ONCOLOGY, Nutritional support < ONCOLOGY, Gastrointestinal tumours < ONCOLOGY                                                                                                                                                                                                                                                                                                                                                                                                                                                                                                                                                                                     |
|                                                    |                                                                                                                                                                                                                                                                                                                                                                                                                                                                                                                                                                                                                                                                                  |

SCHOLARONE™  
Manuscripts



I, the Submitting Author has the right to grant and does grant on behalf of all authors of the Work (as defined in the below author licence), an exclusive licence and/or a non-exclusive licence for contributions from authors who are: i) UK Crown employees; ii) where BMJ has agreed a CC-BY licence shall apply, and/or iii) in accordance with the terms applicable for US Federal Government officers or employees acting as part of their official duties; on a worldwide, perpetual, irrevocable, royalty-free basis to BMJ Publishing Group Ltd ("BMJ") its licensees and where the relevant Journal is co-owned by BMJ to the co-owners of the Journal, to publish the Work in this journal and any other BMJ products and to exploit all rights, as set out in our [licence](#).

The Submitting Author accepts and understands that any supply made under these terms is made by BMJ to the Submitting Author unless you are acting as an employee on behalf of your employer or a postgraduate student of an affiliated institution which is paying any applicable article publishing charge ("APC") for Open Access articles. Where the Submitting Author wishes to make the Work available on an Open Access basis (and intends to pay the relevant APC), the terms of reuse of such Open Access shall be governed by a Creative Commons licence – details of these licences and which [Creative Commons](#) licence will apply to this Work are set out in our licence referred to above.

Other than as permitted in any relevant BMJ Author's Self Archiving Policies, I confirm this Work has not been accepted for publication elsewhere, is not being considered for publication elsewhere and does not duplicate material already published. I confirm all authors consent to publication of this Work and authorise the granting of this licence.



1  
2  
3  
4  
5  
6  
7  
8  
9  
10  
11  
12  
13  
14  
15  
16  
17  
18  
19  
20  
21  
22  
23  
24  
25  
26  
27  
28  
29  
30  
31  
32  
33  
34  
35  
36  
37  
38  
39  
40  
41  
42  
43  
44  
45  
46  
47  
48  
49  
50  
51  
52  
53  
54  
55  
56  
57  
58  
59  
60

## Cohort profile: Biomarkers related to folate-dependent one-carbon metabolism in colorectal cancer recurrence and survival: The FOCUS Consortium

### Authors:

Biljana Gigic<sup>1</sup>, Eline H. van Roekel<sup>2</sup>, Andreana N. Holowatyj<sup>3,4,5,6</sup>, Stefanie Brezina<sup>7</sup>, Anne J.M.R. Geijssen<sup>8</sup>, Arve Ulvik<sup>9</sup>, Jennifer Ose<sup>3,4</sup>, Janna L. Koole<sup>2</sup>, Victoria Damerell<sup>1</sup>, Rama Kiblawi<sup>3,4</sup>, Tanja Gumpenberger<sup>7</sup>, Tengda Lin<sup>3,4</sup>, Gry Kvalheim<sup>9</sup>, Torsten Koelsch<sup>1</sup>, Dieuwertje E. Kok<sup>8</sup>, Fränzel J.B. van Duijnhoven<sup>8</sup>, Martijn J. L. Bours<sup>2</sup>, Andreas Baierl<sup>10</sup>, Christopher I. Li<sup>11</sup>, William M. Grady<sup>11,12,13</sup>, Kathy Vickers<sup>11</sup>, Nina Habermann<sup>14</sup>, Martin Schneider<sup>1</sup>, Ellen Kampman<sup>8,16</sup>, Per-Magne Ueland<sup>9,16</sup>, Alexis B. Ulrich<sup>1,15,16</sup>, Matty Weijenberg<sup>2,16</sup>, Andrea Gsur<sup>7,16,17</sup> and Cornelia M. Ulrich<sup>3,4,16,17</sup>

### Affiliations:

<sup>1</sup> Department of General, Visceral and Transplantation Surgery, Heidelberg University Hospital, Heidelberg, Germany

<sup>2</sup> Department of Epidemiology, Maastricht University, Maastricht, the Netherlands

<sup>3</sup> Huntsman Cancer Institute, Salt Lake City, UT

<sup>4</sup> Department of Population Health Sciences, University of Utah, Salt Lake City, UT

<sup>5</sup> Department of Medicine, Vanderbilt University Medical Center, Nashville, TN

<sup>6</sup> Vanderbilt-Ingram Cancer Center, Nashville, TN

<sup>7</sup> Institute of Cancer Research, Department of Medicine I, Medical University of Vienna, Austria

<sup>8</sup> Division of Human Nutrition and Health, Wageningen University & Research, Wageningen, The Netherlands

<sup>9</sup> BEVITAL, Bergen, Norway

<sup>10</sup> Department of Statistics and Operations Research, University of Vienna, Austria

<sup>11</sup> Public Health Sciences Division, Fred Hutchinson Cancer Research Center, Seattle, Washington

<sup>12</sup> Department of Medicine, University of Washington School of Medicine, Seattle, Washington

<sup>13</sup> Clinical Research Division, Fred Hutchinson Cancer Research Center, Seattle, Washington

<sup>14</sup> Genome Biology, European Molecular Biology Laboratory (EMBL), Heidelberg, Germany

<sup>15</sup> Department of Surgery I, Lukas Hospital Neuss, Neuss, Germany

<sup>16</sup> These authors contributed equally

<sup>17</sup> Corresponding authors

**Keywords:** cohort, consortium, B-vitamins, folate, folic acid, one-carbon metabolism, dietary supplements, biomarkers, treatment toxicity, colorectal cancer, recurrence, survival

### Corresponding author:

Cornelia M. Ulrich, MS, PhD

Chief Scientific Officer and Executive Director of the Cancer Center

Huntsman Cancer Institute

2000 Circle of Hope Drive

Salt Lake City, UT 84112

Phone: +1 (801) 213-5716

Email: neli.ulrich@hci.utah.edu

## 46 **Abstract**

47 **Purpose:** The overarching goal of the FOCUS (Biomarkers related to folate-dependent one-  
48 carbon metabolism in colorectal cancer recurrence and survival) Consortium is to unravel the  
49 effect of folate and folate-mediated one-carbon metabolism (FOCM) biomarkers on colorectal  
50 cancer (CRC) prognosis to provide clinically relevant advice on folate intake to cancer  
51 patients and define future tertiary prevention strategies.

52 **Participants:** The FOCUS Consortium is an international, prospective cohort of 2,401  
53 women and men above 18 years of age who were diagnosed with a primary invasive non-  
54 metastatic (stage I-III) CRC. The Consortium comprises patients from Austria, two sites from  
55 the Netherlands, Germany and two sites from the USA. Patients are recruited after CRC  
56 diagnosis and followed at six and twelve months after enrolment. At each time point,  
57 sociodemographic data, data on health behavior, and clinical data are collected, blood samples  
58 are drawn.

59 **Findings to date:** An increased risk of cancer recurrences was observed among patients with  
60 higher compared to lower circulating folic acid concentrations. Furthermore, specific folate  
61 species within the FOCM pathway were associated with both inflammation and angiogenesis  
62 pathways among CRC patients. In addition, higher vitamin B<sub>6</sub> status was associated with  
63 better quality of life at six months post treatment.

64 **Future plans:** Better insights into the research on associations between folate and FOCM  
65 biomarkers and clinical outcomes in CRC patients will facilitate the development of  
66 guidelines regarding folate intake in order to provide clinically relevant advice to cancer  
67 patients, health professionals involved in patient care, and ultimately further tertiary  
68 prevention strategies in the future. The FOCUS Consortium offers an excellent infrastructure  
69 for short- and long-term research projects and for combining additional biomarkers and data  
70 resulting from the individual cohorts within the next years, e.g. microbiome data, omics- and  
71 multi-omics data or CT-quantified body composition data.

## 72 **Strengths and limitations of this study**

- 73 • FOCUS is the largest consortium to date addressing the research question of folate and  
74 FOCM biomarkers in relation to survival, recurrence, treatment toxicity, and health-  
75 related quality of life outcomes in CRC patients
- 76 • The cohorts included in the FOCUS Consortium are designed to enable future pooling  
77 of data using harmonized and standardized methods to collect data and biospecimens
- 78 • The pooled sample size provides sufficient power to investigate subgroup analyses  
79 across CRC patients
- 80 • Study time point definitions differ between some of the cohorts and have to be adapted  
81 for specific projects
- 82 • A selection bias for follow-up can arise because it is possible that patients who  
83 experience more severe toxicities, worse clinical outcome or health-related quality of  
84 life are underrepresented among those completing follow-ups

85

## 86 Introduction

87 Among men and women world-wide, colorectal cancer (CRC) accounts for nearly 10% of all  
88 incident cancer cases.<sup>1</sup> In Europe, 5-year survival for CRC patients is approximately 55%,  
89 with substantial differences by stage.<sup>2,3</sup> The number of CRC patients continues to increase due  
90 to implementation of improved screening strategies and/or enhanced treatment modalities.<sup>4</sup>  
91 Many cancer patients seek information on what they can do themselves to improve survival -  
92 for instance by improving their dietary habits and other lifestyle factors.<sup>5</sup> However, there may  
93 be behavioural aspects among individuals diagnosed with CRC, which may be harmful in  
94 some cases, such as the use of high-dose nutritional supplements containing synthetic folate.  
95 In general, knowledge on short and long-term effects is insufficient to make sound  
96 recommendations on use of dietary supplements, in particular folate, to cancer survivors, even  
97 though dietary supplements are used by 20%-85% of patients with cancer<sup>6-8</sup>, highlighting the  
98 importance of thorough evaluation of potential benefits and harms and to support  
99 development of evidence-based recommendations on use of dietary supplements to cancer  
100 patients.

101 Folic acid is the synthetic form of the B-vitamin folate and is often used in dietary  
102 supplements or fortified foods. However, there is broad agreement that food folate is less  
103 bioavailable than folic acid with a median relative bioavailability of 65% (range: 44–80%), an  
104 estimate that approximates the 60% value derived from the Dietary Folate Equivalents  
105 equation.<sup>9</sup> Folate and folic acid play an important role in one-carbon metabolism, which is a  
106 complex series of biochemical reactions essential in nucleotide synthesis, methylation  
107 reactions and amino acid homeostasis.<sup>10</sup> One-carbon metabolism refers to a complex network  
108 of biochemical reactions linked to nucleotide synthesis and provides methyl groups for DNA,  
109 RNA or protein methylation. Thus, one-carbon metabolism is directly controlling processes  
110 determining DNA synthesis and integrity, both processes known to be linked to tumor  
111 growth.<sup>11</sup> To what extent folic acid supplement use and biomarkers of folate-mediated one-  
112 carbon metabolism (FOCM) impact cancer survival and treatment efficacy and toxicity still  
113 needs to be clarified.<sup>11,12</sup> Folate and FOCM biomarker deficiencies may increase cancer risk,  
114 but high levels, especially of synthetic folic acid, may also be driving factors in  
115 carcinogenesis.<sup>6,13</sup> An increasing body of evidence suggests that folate plays a dual role in  
116 carcinogenesis, involving both the prevention of early lesions and potential harm once pre-  
117 neoplastic or neoplastic lesions have developed.<sup>6,12,14-20</sup>

1  
2  
3 118 The overarching goal of the FOCUS (biomarkers related to Folate-dependent one-  
4  
5 119 carbon metabolism in Colorectal cancer recurrence and Survival) Consortium is to study  
6  
7 120 associations between folate and FOCM biomarkers and recurrence and survival in CRC  
8  
9 121 patients. Better insights into these associations will facilitate the development of guidelines  
10  
11 122 regarding folate intake in order to provide clinically relevant advice to cancer patients, health  
12  
13 123 professionals involved in patient care, and ultimately further tertiary prevention strategies in  
14  
15 124 the future. The FOCUS Consortium is a large-scale international consortium with CRC  
16  
17 125 patients from six prospective cohort studies. The primary objectives of the FOCUS  
18  
19 126 Consortium are: (i) to determine possible associations of folate and other FOCM biomarkers  
20  
21 127 at diagnosis with recurrence or survival in non-metastatic (stage I-III) CRC; (ii) to elucidate  
22  
23 128 whether biomarkers related to FOCM are associated with dietary and supplemental intake of  
24  
25 129 these respective nutrients; (iii) to explore whether FOCM biomarkers are associated with  
26  
27 130 treatment toxicity in CRC patients undergoing chemotherapy; and (iv) to collect  
28  
29 131 comprehensive data of patient characteristics at baseline and follow-up including biomarkers  
30  
31 132 of FOCM to establish a unique resource for future scientific research. The FOCUS  
32  
33 133 Consortium is funded by the European Research Area Network (ERA-NET) on Translational  
34  
35 134 Cancer Research (TRANSCAN).

36  
37 135 The main purpose of the FOCUS Cohort profile is to (1) inform the scientific  
38  
39 136 community about the FOCUS Consortium, (2) describe the complex methodology of a large  
40  
41 137 consortium, (3) present ongoing studies using this infrastructure as well as (4) advise  
42  
43 138 interested researchers of opportunities for collaboration. This joint research may lead to a  
44  
45 139 better understanding of the role of folate- and FOCM-related mechanisms in the prognosis of  
46  
47 140 CRC and be a precursor for data for future randomized controlled trials (RCTs), which will be  
48  
49 141 critical for the development of guidelines regarding folate intake among CRC patients.

#### 142 **Cohort description**

143 The FOCUS Consortium is an international, prospective consortium including six cohort  
144  
145 studies recruiting women and men age 18 years and older diagnosed with a primary CRC. The  
146  
147 FOCUS Consortium is comprised of patients from the ColoCare Study at the University of  
148  
149 Heidelberg, Germany (n=298, 12.3%), the ColoCare Study at the Huntsman Cancer Institute  
150  
151 in Salt Lake City, Utah, USA (n=80, 3.3%), the ColoCare Study at the Fred Hutchinson  
Cancer Research Center in Seattle, Washington, USA (n=157, 6.3%), the COLON Study  
(Colorectal cancer: Longitudinal, Observational study on Nutritional and lifestyle factors that  
may influence colorectal tumor recurrence, survival and quality of life) at Wageningen  
University & Research in the Netherlands (n=1,365, 56.1%), the CORSA Study (Colorectal

1  
2  
3 152 Cancer Study of Austria) at the Medical University of Vienna in Austria (n=218, 9.0%), and  
4  
5 153 the EnCoRe Study (Energy for life after ColoRectal cancer) at Maastricht University Medical  
6  
7 154 Center+ in the Netherlands (n=317, 13.0%).  
8

9 155 In total, n=2,435 CRC patients were considered for the FOCUS Consortium, of which  
10  
11 156 n=34 patients were excluded due to tumor staging being either 0 or IV leading to a total  
12  
13 157 number of n=2,401 stage I-III CRC patients included in further analyses.  
14

15 158 Patients were recruited after CRC diagnosis and repeated study measurements were  
16  
17 159 conducted at time of recruitment, and at six and twelve months thereafter. At each study time  
18  
19 160 point, sociodemographic data, data on lifestyle factors (e.g., diet, supplement use, physical  
20  
21 161 activity), and clinical data (e.g., tumor site and stage, cancer treatment, treatment-induced  
22  
23 162 toxicities, recurrence, survival) were collected, and blood samples were drawn (**Figure 1**). All  
24  
25 163 individuals signed informed consent and the Institutional Review Board at each site approved  
26  
27 164 the corresponding study. Below, a more specific description of each included study is  
28  
29 165 provided.

### 30 166 The ColoCare Study

31 167 The ColoCare Study (ClinicalTrials.gov identifier: NCT02328677) is an ongoing  
32  
33 168 international, multi-center prospective cohort study among women and men newly diagnosed  
34  
35 169 with a primary invasive CRC, with the goal to investigate predictors of cancer recurrence,  
36  
37 170 survival, treatment toxicities and health-related quality of life.<sup>4 21</sup> Three ColoCare Consortium  
38  
39 171 sites participate in the FOCUS Consortium: the Fred Hutchinson Cancer Research Center in  
40  
41 172 Seattle (Washington, USA), and the University Hospital Heidelberg, Heidelberg (Germany)  
42  
43 173 as well as the Huntsman Cancer Institute in Salt Lake City (Utah, USA). Patients are enrolled  
44  
45 174 prior to undergoing CRC surgery according to the following inclusion criteria: individuals  
46  
47 175 who are 18 years of age and older, newly diagnosed (i.e., non-recurrent) with invasive CRC.  
48  
49 176 Blood draws and other biospecimens are obtained prior to surgery and at regular intervals  
50  
51 177 (e.g., six, twelve, twenty-four months). Questionnaires are administered to assess lifestyle  
52  
53 178 behavior, health-related quality of life, and clinical outcomes such as CRC recurrence,  
54  
55 179 treatment, and treatment symptoms at each study time point. Clinical data are obtained  
56  
57 180 through reviews of patient medical records, pathology and imaging reports. Vital status is  
58  
59 181 obtained through medical records, routine follow-up mailings, periodic requests for outside  
60  
182 medical records, and state or national cancer and death registries. The Heidelberg ColoCare  
183 Study was approved by the Ethics Committee of the Medical Faculty of Heidelberg (approval  
184 no. S-310/2001 and S-134/2016). The ColoCare Study at the Huntsman Cancer Institute and

1  
2  
3 185 the Fred Hutchinson Cancer Research Center were approved by the respective IRBs (#77147  
4  
5 186 and #6407).

6  
7  
8 187 The COLON Study

9  
10 188 The COLON Study (ClinicalTrials.gov identifier: NCT03191110) started in 2010 and is an  
11  
12 189 ongoing, multicenter prospective cohort study specifically designed to assess associations  
13  
14 190 between nutrition, lifestyle, and dietary supplement use with quality of life, CRC recurrence  
15  
16 191 and survival among CRC patients (stages I-IV).<sup>22</sup> Persons with a history of CRC or (partial)  
17  
18 192 bowel resection, chronic inflammatory bowel disease, or a known hereditary CRC syndrome  
19  
20 193 are excluded from the study. Patients are recruited from eleven regional and academic  
21  
22 194 hospitals prior to surgery. Individuals donate blood samples and provide information on diet,  
23  
24 195 lifestyle, and dietary supplement use at CRC diagnosis, i.e. baseline, and at six, twelve  
25  
26 196 (chemotherapy patients only), twenty-four and sixty months after diagnosis. Clinical data are  
27  
28 197 collected through review of medical records (treatment-induced toxicity) or through linkage  
29  
30 198 with the Dutch ColoRectal Audit (DCRA). Mortality data (i.e. death or alive and date of  
31  
32 199 death) are retrieved from the Municipal Personal Records Database. Recurrence data have  
33  
34 200 been retrieved in collaboration with the Netherlands Cancer Registry. Ethical approval for the  
35  
36 201 study was granted by the Committee on Research involving Human Subjects, region Arnhem-  
37  
38 202 Nijmegen under file number 2009/349.

39  
40 203 The CORSA Study

41  
42 204 CORSA is an ongoing case-control study of women and men recruiting CRC patients,  
43  
44 205 patients with high and low risk adenomas and population-based colonoscopy negative  
45  
46 206 controls, with an age range between 30 and 90 years. Since 2003, more than 13,500  
47  
48 207 participants have been recruited across nine sites in Austria. The multicentre recruitment  
49  
50 208 within CORSA follows standardized protocols resulting in consistent data from all  
51  
52 209 recruitment sites. These sites include the Medical University of Vienna (Department of  
53  
54 210 Surgery), two hospitals in Vienna (Clinic Favoriten and Clinic Landstraße), and the Hospital  
55  
56 211 Wiener Neustadt in Lower Austria. Furthermore, the recruitment for CORSA was performed  
57  
58 212 in four hospitals in the federal state Burgenland within the population-based screening  
59  
60 213 program "Burgenland PREvention Trial of colorectal cancer DIsease with ImmunologiCal  
214  
215 214 Testing" (B-PREDICT). B-PREDICT is a two-stage screening project where more than  
216  
215 215 150,000 inhabitants of Burgenland aged between 40 and 80 are invited annually to participate  
216  
216 216 in this program using a Fecal Immunochemical Test (FIT) as an initial screening. FIT-positive

1  
2  
3 217 ( $\geq 10$   $\mu\text{g}$  hemoglobin / g feces) tested individuals are offered a complete colonoscopy and are  
4  
5 218 asked to participate in CORSA. Biospecimen are collected at each site using harmonized  
6  
7 219 protocols. CORSA participants provide a basic CORSA questionnaire assessing data on body  
8  
9 220 mass index (BMI), smoking history, alcohol consumption, education level, family status,  
10  
11 221 profession, basic dietary habits, and diabetes. Clinical data are abstracted from medical  
12  
13 222 records and processed in a structured database following standardized documentation  
14  
15 223 guidelines and according to the General Data Protection Regulation (GDPR). All subjects  
16  
17 224 gave written informed consent and the study was approved by the institutional review boards:  
18  
19 225 ‘Ethikkommission Burgenland’ (33/2010), by the ethical review committee of the Medical  
20  
21 226 University of Vienna (1160/2016) and by the “Ethikkommission der Stadt Wien” (EK 06-  
22  
23 227 150VK).

### 23 228 The EnCoRe Study

24  
25  
26 229 The EnCoRe Study is a prospective cohort study initiated in 2012 at the Maastricht University  
27  
28 230 Medical Center+ in the Netherlands that focuses on the importance of lifestyle factors for  
29  
30 231 quality of life, recurrence and survival of CRC patients.<sup>23</sup> The EnCoRe Study is registered in  
31  
32 232 the Netherlands Trial Registry for experimental and observational studies  
33  
34 233 ([www.trialregister.nl](http://www.trialregister.nl), registration number 7099). Stage I-III CRC patients are enrolled at  
35  
36 234 diagnosis at three hospitals in the South-Eastern region of the Netherlands and followed up  
37  
38 235 until five years after completion of treatment with repeated measurements at diagnosis (pre-  
39  
40 236 treatment), and at six weeks and six, twelve, twenty-four, and sixty months after the end of  
41  
42 237 the initial anti-cancer treatment (i.e., surgery, chemotherapy, radiotherapy). Patients with  
43  
44 238 stage IV CRC, an inability to understand the Dutch language in speech or writing, with  
45  
46 239 comorbidities obstructing successful participation (e.g., Alzheimer disease), or with severe  
47  
48 240 visibility or hearing disorders are excluded from the study. Repeated home visits by trained  
49  
50 241 dieticians are conducted and data are collected amongst others on sociodemographic factors,  
51  
52 242 quality of life, functioning, physical activity, comorbidity, dietary intake, supplement use, and  
53  
54 243 anthropometry. In addition, clinical data are collected from hospital records and blood  
55  
56 244 samples are drawn at all time points. Recurrence data have been retrieved in collaboration  
57  
58 245 with the Netherlands Cancer Registry. Mortality data (i.e. death or alive and date of death) are  
59  
60 246 retrieved from the Municipal Personal Records Database. The EnCoRe Study was approved  
247  
248 by the Medical Ethics Committee of the Maastricht University Hospital and Maastricht  
University (METC 11-3-075).

## 249 The FOCUS Consortium

250 Sociodemographic and clinical characteristics of the 2,401 participants in the FOCUS  
251 Consortium are presented in **Table 1**. The mean age at CRC diagnosis was 65.4 years  
252 (standard deviation (SD): 10.2; range: 22 to 93 years), and the majority of participants were  
253 male (64.0%). The mean BMI was 27.0 kg/m<sup>2</sup> (SD: 4.6).

254 In terms of education status, 35.9% of the patients reported lower education, 28.8% reported  
255 intermediate education and 27.3% high education. Most of the patients were married or part  
256 of a living community (73.1%). About half of the overall cohort reported to be a former  
257 smoker (50.8%), 31.7% were never smokers, and 12.1% were current smokers (5.4% were  
258 unknown). Median alcohol intake was 7.9 g/day. In total, 16.9% of the patients reported  
259 regular dietary supplementation (i.e., at least once per week during the last four weeks) of  
260 folic acid. Over half of all participants (54.6%) reported adherence to the physical activity  
261 guidelines of at least 150 minutes per week of moderate-to-vigorous physical activity.

262 Lifestyle characteristics of the FOCUS cohort are presented in **Table 2**.

263 Regarding clinical characteristics, 57.0% of participants were diagnosed with colon cancer,  
264 33.9% with rectal cancer, and 1.1% with rectosigmoid cancer (8.1% were of unknown tumor  
265 subsite). In total, 26.0% were diagnosed with stage I, 28.7% with stage II, and 40.2% with  
266 stage III CRC. Approximately 1% of participants were classified with an unspecified cancer  
267 stage, as distinction between stage I and II or II and III was not possible, and for 4.4% of the  
268 total population the cancer stage was unknown. In total, 89.3% of patients underwent surgery,  
269 whereas neoadjuvant chemotherapy was administered to 10.6% of patients and 26.8%  
270 received adjuvant chemotherapy. Neoadjuvant radiotherapy was administered to 20.7% of  
271 patients and adjuvant radiotherapy in 9.4% of the population.

## 272 **Patient and public involvement**

273 Patients and the public were not involved in the design, conduct, reporting or dissemination  
274 plans of this research.



**Table 1: Sociodemographic and clinical factors of eligible FOCUS Consortium participants at baseline (n=2,401)**

|                                   | <b>Overall</b> | <b>ColoCare HD</b> | <b>ColoCare FHCRC</b> | <b>ColoCare HCI</b> | <b>COLON</b> | <b>CORSA</b> | <b>EnCoRe</b> |
|-----------------------------------|----------------|--------------------|-----------------------|---------------------|--------------|--------------|---------------|
| n (%)                             | 2,401 (100)    | 298 (12.4)         | 150 (6.3)             | 80 (3.3)            | 1,338 (55.7) | 218 (9.1)    | 317 (13.2)    |
| <b>Age</b>                        |                |                    |                       |                     |              |              |               |
| <b>Mean y ± SD</b>                | 65.4 ± 10.2    | 63.7 ± 12.2        | 58.3 ± 12.8           | 61.3 ± 11.2         | 66.1 ± 8.7   | 67.3 ± 12.0  | 66.9 ± 9.3    |
| <b>Sex</b>                        |                |                    |                       |                     |              |              |               |
| <b>Female n (%)</b>               | 864 (36.0)     | 100 (33.6)         | 67 (44.7)             | 32 (40.0)           | 486 (36.3)   | 76 (34.9)    | 103 (32.5)    |
| <b>Male n (%)</b>                 | 1,537 (64.0)   | 198 (66.4)         | 83 (55.3)             | 48 (60.0)           | 852 (63.7)   | 142 (65.1)   | 214 (67.5)    |
| <b>Education</b>                  |                |                    |                       |                     |              |              |               |
| <b>Low n (%)</b>                  | 861 (35.9)     | 123 (41.3)         | 18 (12.0)             | 17 (21.3)           | 543 (40.6)   | 73 (33.5)    | 87 (27.4)     |
| <b>Intermediate n (%)</b>         | 694 (28.9)     | 57 (19.1)          | 71 (47.3)             | 40 (50.0)           | 332 (24.8)   | 73 (33.5)    | 121 (38.2)    |
| <b>High n (%)</b>                 | 658 (27.4)     | 88 (29.5)          | 28 (18.7)             | 8 (10.0)            | 417 (31.7)   | 14 (6.4)     | 103 (32.5)    |
| <b>Unknown n (%)</b>              | 188 (7.8)      | 30 (10.1)          | 33 (22.0)             | 15 (18.7)           | 46 (3.4)     | 58 (26.6)    | 6 (1.9)       |
| <b>Marital status</b>             |                |                    |                       |                     |              |              |               |
| <b>Unmarried n (%)</b>            | 122 (5.1)      | 19 (6.4)           | 15 (10.0)             | 2 (2.5)             | 60 (4.5)     | 10 (4.6)     | 16 (5.1)      |
| <b>Married n (%)</b>              | 1,738 (72.4)   | 193 (64.8)         | 71 (47.3)             | 50 (62.5)           | 1,071 (80.0) | 113 (51.8)   | 240 (75.7)    |
| <b>Divorced/Separated n (%)</b>   | 138 (5.7)      | 24 (8.0)           | 11 (7.3)              | 10 (12.5)           | 64 (4.8)     | 14 (6.4)     | 15 (4.7)      |
| <b>Widowed n (%)</b>              | 194 (8.1)      | 31 (10.4)          | 7 (4.7)               | 1 (1.3)             | 90 (6.7)     | 26 (11.9)    | 39 (12.3)     |
| <b>Living community n (%)</b>     | 20 (0.8)       | 0                  | 13 (8.7)              | 2 (2.5)             | 4 (0.3)      | 1 (0.5)      | 0             |
| <b>Unknown n (%)</b>              | 189 (8.9)      | 31 (10.4)          | 33 (22.0)             | 15 (18.7)           | 49 (3.7)     | 54 (24.8)    | 7 (2.2)       |
| <b>Smoking status</b>             |                |                    |                       |                     |              |              |               |
| <b>Current n (%)</b>              | 290 (12.1)     | 53 (17.8)          | 8 (5.3)               | 6 (7.5)             | 143 (10.7)   | 38 (17.4)    | 42 (13.3)     |
| <b>Former n (%)</b>               | 1,219 (50.8)   | 132 (44.3)         | 53 (35.32)            | 21 (26.3)           | 767 (57.3)   | 76 (34.9)    | 170 (53.6)    |
| <b>Never n (%)</b>                | 767 (31.9)     | 90 (30.2)          | 56 (37.3)             | 39 (48.7)           | 386 (28.9)   | 97 (44.5)    | 99 (31.2)     |
| <b>Unknown n (%)</b>              | 125 (5.2)      | 23 (7.7)           | 33 (22.0)             | 14 (17.5)           | 42 (3.1)     | 7 (3.2)      | 6 (1.9)       |
| <b>Alcohol intake</b>             |                |                    |                       |                     |              |              |               |
| <b>Mean g/day ± SD</b>            | 13.6 ± 17.1    | 16.1 ± 19.2        | 8.8 ± 18.5            | 2.3 ± 10.2          | 14.0 ± 17.0  |              | 12.9 ± 16.5   |
| <b>Unknown n (%)</b>              | 633 (26.4)     | 208 (69.8)         | 81 (54.0)             | 60 (75.0)           | 54 (4.1)     | 218 (100)    | 12 (3.8)      |
| <b>BMI at diagnosis</b>           |                |                    |                       |                     |              |              |               |
| <b>Mean kg/m<sup>2</sup> ± SD</b> | 27.1 ± 4.6     | 26.6 ± 4.1         | 28.7 ± 7.3            | 29.4 ± 7.5          | 26.6 ± 4.0   | 27.7 ± 4.4   | 28.3 ± 4.6    |
| <b>Unknown n (%)</b>              | 42 (1.7)       | 2 (0.7)            | 0                     | 14 (17.5)           | 10 (0.8)     | 14 (6.4)     | 2 (0.6)       |

|                                       | Overall      | ColoCare HD | ColoCare FHCRC | ColoCare HCI | COLON        | CORSA      | EnCoRe     |
|---------------------------------------|--------------|-------------|----------------|--------------|--------------|------------|------------|
| <b>Tumor site</b>                     |              |             |                |              |              |            |            |
| <b>Colon n (%)</b>                    | 1,450 (60.4) | 140 (57.0)  | 75 (50.0)      | 45 (56.3)    | 867 (64.8)   | 131 (60.1) | 192 (60.6) |
| <b>Rectum n (%)</b>                   | 862 (35.9)   | 143 (48.0)  | 60 (40.0)      | 22 (27.5)    | 434 (32.4)   | 78 (35.8)  | 125 (39.4) |
| <b>Rectosigmoid n (%)</b>             | 42 (1.7)     | 15 (5.0)    | 15 (10.0)      | 7 (8.7)      | 0            | 5 (2.3)    | 0          |
| <b>Unknown n (%)</b>                  | 47 (2.0)     | 0           | 0              | 6 (7.5)      | 37 (2.8)     | 4 (1.8)    | 0          |
| <b>Tumor stage</b>                    |              |             |                |              |              |            |            |
| <b>I n (%)</b>                        | 629 (26.2)   | 76 (25.5)   | 35 (23.3)      | 21 (26.3)    | 326 (24.4)   | 82 (37.6)  | 89 (28.1)  |
| <b>II n (%)</b>                       | 694 (28.9)   | 114 (38.3)  | 49 (32.7)      | 23 (28.7)    | 386 (28.9)   | 52 (23.9)  | 70 (22.1)  |
| <b>III n (%)</b>                      | 973 (40.5)   | 108 (36.2)  | 66 (44.0)      | 36 (45.0)    | 564 (42.1)   | 52 (23.9)  | 147 (46.4) |
| <b>Unspecified* n (%)</b>             | 16 (0.7)     | 0           | 0              | 0            | 4 (0.3)      | 12 (5.5)   | 0          |
| <b>Unknown n (%)</b>                  | 89 (3.7)     | 0           | 0              | 0            | 58 (4.3)     | 20 (9.2)   | 11 (3.5)   |
| <b>Treatment</b>                      |              |             |                |              |              |            |            |
| <b>Neoadjuvant chemotherapy n (%)</b> | 331 (13.8)   | 55 (18.5)   | 47 (31.3)      | 15 (18.8)    | 138 (10.3)   | 14 (6.4)   | 62 (19.6)  |
| <b>Unknown n (%)</b>                  | 58 (2.4)     | 2 (0.7)     | 1 (0.7)        | 10 (12.5)    | 38 (2.8)     | 7 (3.2)    | 0          |
| <b>Neoadjuvant radiotherapy n (%)</b> | 523 (21.8)   | 72 (24.2)   | 48 (32.0)      | 13 (16.3)    | 290 (21.7)   | 14 (6.4)   | 86 (27.1)  |
| <b>Unknown n (%)</b>                  | 58 (2.4)     | 2 (0.7)     | 1 (0.7)        | 10 (12.5)    | 38 (2.8)     | 7 (3.2)    | 0          |
| <b>Adjuvant chemotherapy n (%)</b>    | 682 (28.4)   | 100 (33.6)  | 80 (53.3)      | 32 (40.0)    | 315 (23.8)   | 56 (25.7)  | 99 (31.2)  |
| <b>Unknown n (%)</b>                  | 121 (5.0)    | 17 (5.7)    | 3 (2.0)        | 28 (35.0)    | 63 (4.7)     | 9 (4.1)    | 1 (0.3)    |
| <b>Adjuvant radiotherapy n (%)</b>    | 227 (9.5)    | 188 (63.1)  | 7 (4.7)        | 1 (1.3)      | 16 (1.2)     | 13 (6.0)   | 2 (0.6)    |
| <b>Unknown n (%)</b>                  | 164 (6.8)    | 17 (5.7)    | 3 (2.0)        | 28 (35.0)    | 106 (7.9)    | 9 (4.1)    | 1 (0.3)    |
| <b>Surgery n (%)</b>                  | 2,291 (95.4) | 298 (100.0) | 149 (99.3)     | 71 (88.7)    | 1,290 (96.4) | 195 (89.5) | 288 (90.9) |
| <b>Unknown n (%)</b>                  | 44 (1.8)     | 0           | 0              | 3 (3.8)      | 39 (2.9)     | 1 (0.5)    | 1 (0.3)    |

\*Distinguishing between stage I and II or II and III not possible

**Table 2: Lifestyle characteristics of eligible FOCUS Consortium participants at baseline (n=2,401)**

|                                                   | Overall         | ColoCare HD     | ColoCare FHCRC | ColoCare HCI    | COLON           | CORSA     | EnCoRe          |
|---------------------------------------------------|-----------------|-----------------|----------------|-----------------|-----------------|-----------|-----------------|
| n (%)                                             | 2,401 (100)     | 298 (12.4)      | 150 (6.3)      | 80 (3.3)        | 1,338 (55.7)    | 218 (9.1) | 317 (13.2)      |
| <b>Folic acid supplementation</b>                 |                 |                 |                |                 |                 |           |                 |
| Yes n (%)                                         | 405 (16.9)      | 4 (1.3)         | 9 (5.9)        | 2 (2.5)         | 325 (24.3)      |           | 65 (20.5)       |
| Unknown n (%)                                     | 383 (15.9)      | 27 (9.1)        | 86 (56.6)      | 14 (17.5)       | 38 (2.8)        | 218 (100) | 0               |
| <b>Vitamin B<sub>12</sub> supplementation</b>     |                 |                 |                |                 |                 |           |                 |
| Yes n (%)                                         | 430 (17.9)      | 10 (3.4)        | 8 (5.3)        | 14 (17.5)       | 336 (25.1)      |           | 62 (19.6)       |
| Unknown n (%)                                     | 384 (16.0)      | 27 (9.1)        | 86 (56.6)      | 14 (17.5)       | 39 (2.9)        | 218 (100) | 0               |
| <b>Vitamin B<sub>6</sub> supplementation</b>      |                 |                 |                |                 |                 |           |                 |
| Yes n (%)                                         | 77 (3.2)        | 8 (2.7)         | 4 (2.6)        | 4 (5.0)         |                 |           | 61 (19.2)       |
| Unknown n (%)                                     | 1,684 (70.1)    | 27 (9.1)        | 86 (56.6)      | 14 (17.5)       | 1,339 (100)     | 218 (100) | 0               |
| <b>Vitamin B<sub>2</sub> supplementation</b>      |                 |                 |                |                 |                 |           |                 |
| Yes n (%)                                         | 62 (2.6)        | 0               | 2 (1.3)        | 0               |                 |           | 60 (18.9)       |
| Unknown n (%)                                     | 1,684 (70.1)    | 27 (9.1)        | 86 (56.6)      | 14 (17.5)       | 1,339 (100)     | 218 (100) | 0               |
| <b>Dietary intake of folate equivalents</b>       |                 |                 |                |                 |                 |           |                 |
| Mean µg/day ± SD                                  | 227.1 ± 94.3    | 115.1 ± 38.1    | 149.6 ± 97.5   | 116.2 ± 112.8   | 229.0 ± 88.7    |           | 276.3 ± 82.2    |
| Unknown n (%)                                     | 638 (26.5)      | 208 (69.8)      | 83 (54.6)      | 60 (75.0)       | 57 (4.3)        | 218 (100) | 12 (3.8)        |
| <b>Dietary intake of vitamin B<sub>12</sub></b>   |                 |                 |                |                 |                 |           |                 |
| Mean µg/day ± SD                                  | 4.6 ± 2.4       | 6.2 ± 2.9       | 7.1 ± 5.8      | 4.2 ± 2.2       | 4.3 ± 2.1       |           | 4.6 ± 2.0       |
| Unknown n (%)                                     | 638 (26.5)      | 208 (69.8)      | 83 (54.6)      | 60 (75.0)       | 57 (4.3)        | 218 (100) | 12 (3.8)        |
| <b>Dietary intake of vitamin B<sub>6</sub></b>    |                 |                 |                |                 |                 |           |                 |
| Mean mg/day ± SD                                  | 1.5 ± 0.5       | 1.7 ± 0.5       | 2.0 ± 0.7      | 1.5 ± 0.7       | 1.5 ± 0.5       |           | 1.8 ± 0.5       |
| Unknown n (%)                                     | 638 (26.5)      | 208 (69.8)      | 83 (54.6)      | 60 (75.0)       | 57 (4.3)        | 218 (100) | 12 (3.8)        |
| <b>Dietary intake of vitamin B<sub>2</sub></b>    |                 |                 |                |                 |                 |           |                 |
| Mean mg/day ± SD                                  | 1.4 ± 0.5       | 1.5 ± 0.5       | 2.2 ± 1.0      | 1.6 ± 0.8       | 1.3 ± 0.4       |           | 1.4 ± 0.5       |
| Unknown n (%)                                     | 638 (26.5)      | 208 (69.8)      | 83 (54.6)      | 60 (75.0)       | 57 (4.3)        | 218 (100) | 12 (3.8)        |
| <b>Total energy intake</b>                        |                 |                 |                |                 |                 |           |                 |
| Mean kcal/day ± SD                                | 1,941.8 ± 593.6 | 2,330.9 ± 714.0 | 1835.0 ± 775.7 | 1,398.5 ± 597.8 | 1,856.9 ± 517.2 |           | 2,243.7 ± 651.0 |
| Unknown n (%)                                     | 638 (26.5)      | 208 (69.8)      | 83 (54.6)      | 60 (75.0)       | 57 (4.3)        | 218 (100) | 12 (3.8)        |
| <b>Adherence to physical activity guidelines*</b> |                 |                 |                |                 |                 |           |                 |

|                      |              |           |           |           |            |           |            |
|----------------------|--------------|-----------|-----------|-----------|------------|-----------|------------|
| <b>Yes n (%)</b>     | 1,310 (54.5) | 84 (28.2) | 35 (23.0) | 20 (25.0) | 941 (70.3) |           | 230 (72.6) |
| <b>Unknown n (%)</b> | 370 (15.4)   | 33 (11.1) | 53 (34.9) | 15 (18.7) | 45 (3.4)   | 218 (100) | 6 (1.9)    |

\*Self-reported engagement in at least 150 minutes per week of moderate-to-vigorous physical activity

For peer review only

## 280 **Cohort follow-up**

281 At each study site, collection of biospecimen, clinical, demographic, questionnaire and  
282 anthropometric data occurred at baseline, and at six and twelve months following recruitment.  
283 Baseline measurements in CORSA, COLON and EnCoRe have been performed at diagnosis  
284 (preferably prior to any cancer treatment) while in the ColoCare Study such measurements  
285 have been done prior to surgery (i.e. neoadjuvant treatment might have been applied prior to  
286 baseline blood and data collection).

287 Blood samples at baseline were collected from n=2,132 (88.8%) study participants.  
288 N=1,537 (64.0%) participants donated blood at the 6 month and n=614 (25.6%) at the 12  
289 month follow-up time point. Additionally, n=251 (10.5%) EnCoRe patients provided blood  
290 samples at 6 weeks post-treatment, a subset specifically of interest at the Maastricht study  
291 site.

## 292 **Data collection**

293 Harmonized baseline and follow-up time points are summarized in **Table 3** and are briefly  
294 described below.

### 295 Lifestyle and demographic data

296 ColoCare questionnaires and standardized Food Frequency Questionnaires (FFQ) are used to  
297 assess intake of dietary supplements and medication, smoking, dietary intake and other health  
298 behaviors at each study time point. In COLON, patients provide information on diet, lifestyle,  
299 and supplement use via COLON questionnaires and FFQs. Patients from the CORSA Study  
300 are requested to complete a questionnaire assessing anthropometric and demographic factors.  
301 Patients enrolled in EnCoRe receive repeated home visits by trained dietitians, where  
302 extensive measurements are performed that include assessment of demographic data, physical  
303 activity (both questionnaire- and accelerometry-based) and smoking behavior (questionnaire  
304 data), dietary intake (FFQs at diagnosis and 7-day food diaries at follow-up measurements),  
305 supplement use (registered by dietitians), and anthropometry measurements.

**Table 3: Variables available at baseline, and at 6 and 12 month follow-up within the FOCUS Consortium.**

| Category                 | Variables                           | Baseline    | 6m | 12m |
|--------------------------|-------------------------------------|-------------|----|-----|
| <b>Demographics</b>      | Age                                 | x           | x  | x   |
|                          | Gender                              | x           |    |     |
|                          | Highest education                   | x           |    |     |
|                          | Social status                       | x           |    |     |
|                          | Height                              | x           |    |     |
|                          | Weight                              | x           | x  | x   |
|                          | BMI                                 | x           | x  | x   |
|                          | Smoking status                      | x           | x  | x   |
|                          | Smoking duration                    | x           | x  | x   |
|                          | Smoking pack years                  | x           | x  | x   |
|                          | Menopausal status                   | x           |    |     |
|                          | Postmenopausal hormone use          | x           |    |     |
|                          | Race                                | x           |    |     |
|                          | <b>Cancer characteristics</b>       | Cancer site | x  |     |
| Cancer stage             |                                     | x           |    |     |
| TNM classification       |                                     | x           |    |     |
| <b>Treatment</b>         | Preoperative chemotherapy           | x           |    |     |
|                          | Preoperative radiotherapy           | x           |    |     |
|                          | Surgery                             | x           | x  |     |
|                          | Postoperative chemotherapy          |             | x  | x   |
|                          | Postoperative radiotherapy          |             | x  | x   |
| <b>Supplement intake</b> | Folic acid supplements              | x           | x  | x   |
|                          | Vitamin B <sub>2</sub> supplements  | x           | x  | x   |
|                          | Vitamin B <sub>6</sub> supplements  | x           | x  | x   |
|                          | Vitamin B <sub>12</sub> supplements | x           | x  | x   |
|                          | Vitamin A supplements               | x           | x  | x   |
|                          | Vitamin C supplements               | x           | x  | x   |
|                          | Vitamin D supplements               | x           | x  | x   |
| <b>Supplement intake</b> | Vitamin E supplements               | x           | x  | x   |
|                          | Calcium supplements                 | x           | x  | x   |
|                          | Magnesium supplements               | x           | x  | x   |
|                          | Iron supplements                    | x           | x  | x   |
|                          | Multivitamins                       | x           | x  | x   |
| <b>Dietary nutrients</b> | Folate equivalents                  | x           | x  | x   |
|                          | Vitamin B <sub>2</sub>              | x           | x  | x   |
|                          | Vitamin B <sub>6</sub>              | x           | x  | x   |
|                          | Vitamin B <sub>12</sub>             | x           | x  | x   |
|                          | Vitamin A                           | x           | x  | x   |
|                          | Vitamin C                           | x           | x  | x   |
|                          | Vitamin D                           | x           | x  | x   |
|                          | Vitamin E                           | x           | x  | x   |
|                          | Total protein                       | x           | x  | x   |
| Total fat                | x                                   | x           | x  |     |
| Total carbohydrate       | x                                   | x           | x  |     |

|                                       |                                                                  |   |   |   |
|---------------------------------------|------------------------------------------------------------------|---|---|---|
| <b>Dietary nutrients</b>              | Fibre                                                            | x | x | x |
|                                       | Saturated fatty acids                                            | x | x | x |
|                                       | Monounsaturated fatty acids                                      | x | x | x |
|                                       | Polyunsaturated fatty acids                                      | x | x | x |
|                                       | Alcohol                                                          | x | x | x |
|                                       | Total energy                                                     | x | x | x |
| <b>Physical activity</b>              | Light physical activity                                          | x | x | x |
|                                       | Moderate physical activity                                       | x | x | x |
|                                       | Vigorous physical activity                                       | x | x | x |
|                                       | Adherence to physical activity guidelines                        | x | x | x |
| <b>Medical history</b>                | Diabetes mellitus                                                | x | x | x |
|                                       | Asthma, Chronical Bronchitis, COPD, Emphysema                    | x |   |   |
|                                       | Heart attack, Heart Failure                                      | x |   |   |
|                                       | Hypertension                                                     | x |   |   |
|                                       | Stroke                                                           | x |   |   |
|                                       | Ulcer of Stomach or Duodenum                                     | x |   |   |
|                                       | Hypothyroidism/Hyperthyroidism                                   | x |   |   |
|                                       | Systemic Lupus Erythematosus                                     | x |   |   |
|                                       | Inflammatory Bowel Disease (Crohn's disease, ulcerative colitis) | x |   |   |
|                                       | Familial Adenomatous Polyposis                                   | x |   |   |
| <b>Medical history</b>                | Lynch Syndrome (hereditary nonpolyposis colorectal cancer)       | x |   |   |
| <b>Regular medication use</b>         | Aspirin                                                          | x | x | x |
|                                       | NSAID                                                            | x | x | x |
|                                       | Ibuprofen                                                        | x | x | x |
|                                       | Naproxen                                                         | x | x | x |
|                                       | Celecoxib/Etoricoxib                                             | x | x | x |
| <b>Health-related quality of life</b> | EORTC QLQ-C30                                                    | x | x | x |
|                                       | EORTC QLQ-CR29                                                   | x | x | x |
|                                       | EORTC QLQ-CIPN20                                                 | x | x | x |
| <b>General information</b>            | Date of questionnaire completion                                 | x | x | x |
|                                       | Date of blood collection                                         | x | x | x |
|                                       | Freeze-thaw cycles of blood samples                              | x | x | x |
|                                       | Hemolysis                                                        | x | x | x |
|                                       | Time between blood draw and processing/storage                   | x | x | x |

NSAID=non-steroidal anti-inflammatory drug; EORTC=European Organization for Research and Treatment of Cancer; QLQ=quality of life questionnaire; C30=core 30-items; CR29=colon/rectum 29-items; CIPN20=chemotherapy-induced polyneuropathy 20-items.

306

### 307 Clinical data and outcomes - Medical chart abstraction

308 All cancers and medical diagnoses are classified according to ICD-10 (International  
309 Classification of Diseases, Tenth Revision) codes. Details on CRC treatment, including type  
310 of treatment regimens and treatment toxicity, are abstracted via medical record for all cohorts.  
311 Detailed information on the primary outcomes of interest, CRC recurrence and survival, are  
312 ascertained through reviews of medical records, pathology reports, and imaging reports  
313 documenting the diagnosis of a recurrence. Data on recurrence and vital status is  
314 supplemented from the clinical cancer registries and survival data is verified by the inhabitant  
315 registries that exist at all study sites. For COLON and EnCoRe, all data on recurrence are  
316 retrieved in collaboration with the Netherlands Cancer Registry. Moreover, survival data for  
317 CORSA participants was obtained by the Main Association of Austrian Social Insurance  
318 Carriers as well as from Statistics Austria.

### 319 Patient-reported outcomes

320 Health-related quality of life is assessed by the validated and widely used cancer-specific 30-  
321 item core questionnaire QLQ-C30 and the 29-item CRC module QLQ-CR29, developed by  
322 the European Organization for Research and Treatment of Cancer (EORTC).<sup>24</sup>  
323 Chemotherapy-induced peripheral neuropathy (CIPN), which is a common toxicity in CRC  
324 patients, is measured by the EORTC QLQ-CIPN20.<sup>25</sup> Patient-reported outcomes are available  
325 for ColoCare Heidelberg, COLON and EnCoRe.

### 326 Biomarkers of FOCM

327 Blood is processed in identical settings across all study centers. Plasma (CORSA, COLON  
328 and EnCoRe) and serum (for the three ColoCare Study sites) samples were collected and  
329 immediately centrifuged, aliquoted, and stored at -80°C.

330 All biological analyses were performed at BEVITAL AS (Bergen, Norway,  
331 <http://www.bevital.no>), which carried out metabolic profiling of biomarkers allocated to seven  
332 complementary analytical platforms. Apart from analyses of microbiological active folate<sup>26</sup>  
333 and vitamin B<sub>12</sub><sup>27</sup>, all analyses were based on mass spectrometry. Circulating folate, separate  
334 folate species, 5-methyltetrahydrofolate (the main form in plasma), folic acid (folate in  
335 supplements), 4a-OH 5-methyltetrahydrofolate (the primary oxidation form of circulating  
336 folate), folate catabolites (p-aminobenzoylglutamate and acetyl p-aminobenzoylglutamate)<sup>28</sup>,  
337 B<sub>6</sub>, B<sub>1</sub> and B<sub>3</sub> vitamins, kynurenines, cotinine, trans-3'-hydroxycotinine, trigonelline<sup>29</sup>,  
338 choline and its metabolites, creatinine, methylhistidines, arginine and methylated arginines<sup>30</sup>



1  
2  
3 339 were analyzed by liquid chromatography-tandem mass spectroscopy, whereas other amino  
4  
5 340 acids, in addition to total homocysteine, total cysteine and methylmalonic acid were analyzed  
6  
7 341 by gass chromatography-tandem mass spectroscopy.<sup>31</sup> C-reactive protein (hsCRP) and  
8  
9 342 cystatin C and its variants were measured by MALDI-TOF mass spectroscopy.<sup>32</sup>

10  
11 343 A comprehensive overview of the panel of biomarkers measured in blood samples of  
12  
13 344 patients enrolled in the FOCUS Consortium is provided in **Table 4**.

### 14 15 345 **Findings to date**

16  
17 346 The FOCUS Consortium provides a unique opportunity to conduct comprehensive research  
18  
19 347 on folate and FOCM biomarkers status in the tertiary prevention of CRC using data collected  
20  
21 348 both at diagnosis and during standardized follow-up time points. This well-characterized  
22  
23 349 study design provides sufficient statistical power to discern prospective associations with  
24  
25 350 relevant clinical outcomes, including CRC recurrence and survival within relevant subgroups.

### 26 27 351 Key findings and publications

28  
29 352 We investigated associations of circulating concentrations of folate, folic acid, and folate  
30  
31 353 catabolites pABG and apABG, measured around time of diagnosis, with recurrence and survival  
32  
33 354 among 2024 patients diagnosed with stage I-III CRC within the international FOCUS  
34  
35 355 Consortium. We did not observe any statistically significant associations for folate, pABG, and  
36  
37 356 apABG concentrations. However, an increased risk of cancer recurrences was observed among  
38  
39 357 patients with higher compared to lower circulating folic acid concentrations.<sup>33</sup> Further, Kiblawi  
40  
41 358 et al. measured associations between one-carbon metabolites, inflammation- and angiogenesis-  
42  
43 359 related biomarkers in a cross-sectional analysis of 238 patients from the ColoCare Heidelberg  
44  
45 360 cohort. The study showed that specific folate species within the one-carbon metabolism  
46  
47 361 pathway are associated with both inflammation and angiogenesis pathways among CRC  
48  
49 362 patients. In particular, vitamin B6 species, pyridoxal 5'-phosphate (PLP), pyridoxal (PL) and  
50  
51 363 pyridoxic acid (PA), were inversely associated with inflammatory biomarkers C-reactive  
52  
53 364 protein (CRP), serum amyloid A (SAA), IL-6 and IL-8. Thiamine and thiamine monophosphate  
54  
55 365 were inversely correlated with the CRP and IL-6. In addition, positive correlations of PA, PL  
56  
57 366 and PLP with angiogenesis biomarker VEGF-D were observed. Our findings reinforce the  
58  
59 367 notion that B vitamins involved in the one-carbon metabolism may be correlated with  
60  
370 368 carcinogenic processes.<sup>34</sup> This and further research will support the evidence base needed for  
the development of dietary guidelines for CRC patients.

**Table 4: Measured metabolites and biomarkers within the FOCUS Consortium**

| <b>Folate and one-carbon metabolites</b>                   | <b>Abbreviation</b> | <b>Description</b>                           |
|------------------------------------------------------------|---------------------|----------------------------------------------|
| <b>Anthranilic acid</b>                                    | AA                  | Tryptophan metabolite                        |
| <b>Asymmetric dimethylarginine</b>                         | ADMA                | Inhibitor of nitric oxide synthase           |
| <b><math>\alpha</math>-Ketoglutaric acid</b>               | aKG                 | Keto acid of the Krebs cycle                 |
| <b>Alanine</b>                                             | Ala                 | Amino acid                                   |
| <b>Acetamidobenzoylglutamate</b>                           | apABG               | Folate catabolite                            |
| <b>Arginine</b>                                            | Arg                 | Amino acid                                   |
| <b>Asparagine</b>                                          | Asn                 | Amino acid                                   |
| <b>Aspartic acid</b>                                       | Asp                 | Amino acid                                   |
| <b>Betaine</b>                                             | Betaine             | Methyl donor                                 |
| <b>Choline</b>                                             | Choline             | Methyl donor                                 |
| <b>C-reactive protein</b>                                  | hsCRP               | Inflammatory marker                          |
| <b>Cystatin C-desS</b>                                     | CnCds               | Cystatin C isoform                           |
| <b>Cystatin C-desSSP</b>                                   | CnDcssp             | Cystatin C isoform                           |
| <b>Cystatin C</b>                                          | CnCn                | Marker of kidney function                    |
| <b>3Pro-OH cystatin C</b>                                  | CnCo                | Cystatin C isoform                           |
| <b>3Pro-OH cystatin C-desS</b>                             | CnCods              | Cystatin C isoform                           |
| <b>Total concentration of detected cystatin C isoforms</b> | CnCt                | Marker of kidney function                    |
| <b>Cobalamin</b>                                           | B <sub>12</sub>     | Vitamin B <sub>12</sub>                      |
| <b>Cotinine</b>                                            | Cot                 | Nicotine metabolite                          |
| <b>Creatinine</b>                                          | Creat               | Marker of kidney function                    |
| <b>C-reactive protein</b>                                  | CRP                 | Inflammation                                 |
| <b>Cystathionine</b>                                       | Cysta               | Thioether, transsulfuration intermediate     |
| <b>Dimethylglycine</b>                                     | DMG                 | Betaine metabolite                           |
| <b>Folic acid</b>                                          | B <sub>9</sub>      | Synthetic form of folate                     |
| <b>Flavin mononucleotide</b>                               | FMN                 | B <sub>2</sub> vitamin                       |
| <b>5-Formyl-tetrahydrofolate</b>                           | fTHF                | Folate species                               |
| <b>Glutamine</b>                                           | Gln                 | Amino acid                                   |
| <b>Glutamic acid</b>                                       | Glu                 | Amino acid                                   |
| <b>Glycine</b>                                             | Gly                 | Amino acid                                   |
| <b>3-Hydroxyanthranilic acid</b>                           | HAA                 | Tryptophan metabolite                        |
| <b>Homoarginine</b>                                        | hArg                | Amino acid                                   |
| <b>Histidine</b>                                           | Hist                | Tryptophan metabolite                        |
| <b>3-Hydroxykynurenine</b>                                 | HK                  | Tryptophan metabolite                        |
| <b>4-Alfa-hydroxy-5-methyl-THF</b>                         | hmTHF               | Folate oxidation product                     |
| <b>Isoleucine</b>                                          | Ile                 | Amino acid                                   |
| <b>Kynurenic acid</b>                                      | KA                  | Tryptophan metabolite                        |
| <b>Kynurenine</b>                                          | Kyn                 | Tryptophan metabolite                        |
| <b>Leucine</b>                                             | Leu                 | Amino acid                                   |
| <b>Lysine</b>                                              | Lys                 | Amino acid                                   |
| <b>3-Methylhistidine (3-MH)</b>                            | m3His               | Marker of muscle degradation and meat intake |
| <b>1-Methylhistidine (1-MH)</b>                            | m1His               | Marker of muscle degradation and meat intake |
| <b>Methionine</b>                                          | Met                 | Amino acid                                   |
| <b>Methionine sulfoxide</b>                                | MetSo               | Oxidation product of Met                     |
| <b>Methylmalonic acid</b>                                  | MMA                 | Marker of B <sub>12</sub> status             |
| <b>N1-methylnicotinamide</b>                               | mNAM                | B <sub>3</sub> vitamin                       |
| <b>5-Methyl-tetrahydrofolate</b>                           | mTHF                | Folate species                               |

|                                   |          |                                             |
|-----------------------------------|----------|---------------------------------------------|
| <b>Nicotinic acid</b>             | NA       | B <sub>3</sub> vitamin                      |
| <b>Nicotinamide</b>               | NAM      | B <sub>3</sub> vitamin                      |
| <b>Neopterin</b>                  | Neopt    | Inflammatory marker                         |
| <b>Trans-3'-hydroxycotinine</b>   | OHCot    | Nicotine metabolite                         |
| <b>Ornithine</b>                  | Orn      | Amino acid                                  |
| <b>4-Pyridoxic acid</b>           | PA       | Vitamin B <sub>6</sub> catabolite           |
| <b>Para-aminobenzoylglutamate</b> | pABG     | Folate catabolite                           |
| <b>Phenylalanine</b>              | Phe      | Amino acid                                  |
| <b>Picolinic acid</b>             | Pic      | Tryptophan metabolite                       |
| <b>Pyridoxal</b>                  | PL       | B <sub>6</sub> vitamin                      |
| <b>Pyridoxal 5'-phosphate</b>     | PLP      | B <sub>6</sub> vitamin                      |
| <b>Pyridoxine</b>                 | PN       | Synthetic form of vitamin B <sub>6</sub>    |
| <b>Proline</b>                    | Pro      | Amino acid                                  |
| <b>Quinolinic acid</b>            | QA       | Tryptophan metabolite                       |
| <b>Riboflavin</b>                 | Ribo     | Main circulating B <sub>2</sub> form        |
| <b>Symmetric dimethylarginine</b> | SDMA     | Marker of renal function                    |
| <b>Serine</b>                     | Ser      | Amino acid                                  |
| <b>Folate</b>                     | spFolate | Microbiologically active folate             |
| <b>Total cysteine</b>             | tCys     | Amino acid                                  |
| <b>Homocysteine</b>               | tHcy     | Marker of folate and B <sub>12</sub> status |
| <b>Thiamine</b>                   | Thi      | B <sub>1</sub> vitamin                      |
| <b>Threonine</b>                  | Thr      | Amino acid                                  |
| <b>Trimethylamineoxide</b>        | TMAO     | Choline metabolite                          |
| <b>Trimethyllysine</b>            | TML      | Amino acid                                  |
| <b>Thiamine monophosphate</b>     | TMP      | B <sub>1</sub> vitamin                      |
| <b>Trigonelline</b>               | Trig     | Marker of coffee consumption                |
| <b>Tryptophan</b>                 | Trp      | Amino acid                                  |
| <b>Valine</b>                     | Val      | Amino acid                                  |
| <b>Leucine</b>                    | Leu      | Amino acid                                  |
| <b>Xanthurenic acid</b>           | XA       | Tryptophan metabolite                       |
| <b>Kyn/Trp ratio</b>              | KTR      | Marker of immune activation                 |
| <b>HK/XA ratio</b>                |          | Marker of B <sub>6</sub> status             |

371  
372 Further, we investigated circulating concentrations of nine biomarkers related to the B-  
373 vitamins folate, riboflavin, vitamin B<sub>6</sub>, and cobalamin, measured at diagnosis and six months  
374 post-diagnosis, in association with health-related quality of life as assessed by the EORTC  
375 QLQ-C30 questionnaire six months post-treatment in three FOCUS cohorts (ColoCare  
376 Heidelberg, EnCoRe and COLON).<sup>35</sup> Higher PLP concentrations were cross-sectionally  
377 associated with better physical, role, and social functioning, and reduced fatigue six months  
378 post-diagnosis. Higher HKr (3-hydroxykynurenine:(kynurenic acid+xanthurenic acid+3-  
379 hydroxyanthranilic acid+anthranilic acid)), an inverse marker of vitamin B<sub>6</sub> status, was cross-  
380 sectionally associated with worse global quality of life, and lower physical and role  
381 functioning. Dose-response relations were observed for PLP with global quality of life,  
382 physical, role, and social functioning. No associations were observed for changes in  
383 biomarker concentrations between diagnosis and six months with quality of life outcomes. We

1  
2  
3 384 therefore concluded that higher vitamin B<sub>6</sub> status was associated with better quality of life at  
4  
5 385 six months post treatment and that further study is needed to clarify the role of vitamin B<sub>6</sub> in  
6  
7 386 relation to quality of life.

8  
9 387 Previous relevant findings from individual cohorts within the consortium

10  
11 388 To date, individual cohorts from the FOCUS Consortium have initiated the examination of  
12  
13 389 dietary supplement use and dietary habits over time. Among CRC patients enrolled in the  
14  
15 390 ColoCare Study the proportion of supplement users was found to be highest post-diagnosis  
16  
17 391 (35%).<sup>36</sup> Moreover, within an international investigation including ColoCare participants from  
18  
19 392 multiple sites, Ulrich et al. showed differences in plasma folate concentration between  
20  
21 393 Heidelberg and the US sites, probably reflecting variation in folic acid fortification and  
22  
23 394 supplement use.<sup>13</sup> Furthermore, ColoCare has published data on RECQ helicase expression<sup>37</sup>,  
24  
25 395 NTRK3<sup>38</sup>, RET<sup>39</sup>, tumor-infiltrating lymphocytes and T cell receptor sequences<sup>40</sup>, 25-25-  
26  
27 396 hydroxyvitamin D<sub>3</sub><sup>13 41</sup>, DNA methylation<sup>42-45</sup>, miRNAs<sup>46 47</sup>, fecal microbiota<sup>48-50</sup>,  
28  
29 397 metabolomics and transcriptomics<sup>51-53</sup>, plasma proteins<sup>54</sup>, gene expression<sup>55</sup>, branched-chain  
30  
31 398 amino acids<sup>56</sup>, genetic variants<sup>57</sup>, body composition<sup>53 58 59</sup>, physical activity<sup>41</sup>, and dietary  
32  
33 399 patterns<sup>4</sup> in CRC patients. Within the COLON study, results have been published on body  
34  
35 400 weight trajectories<sup>60</sup>, changes in lifestyle<sup>61</sup>, 25-hydroxy vitamin D levels<sup>62 63</sup>, and  
36  
37 401 inflammation markers<sup>64</sup> over time, as well as vitamin D<sup>64</sup>, calcium or magnesium intake<sup>65</sup>,  
38  
39 402 physical activity<sup>66</sup>, inflammation<sup>67 68</sup>, skeletal muscle mass<sup>69</sup>/ density<sup>70</sup> and other measures of  
40  
41 403 body composition<sup>71</sup> in relation to cancer recurrence, survival, or physical functioning or  
42  
43 404 fatigue. Moreover, in a subset of patients undergoing chemotherapy, dietary factors in relation  
44  
45 405 to chronic CIPN<sup>72 73</sup> as well as chemosensory perception and food preferences<sup>74</sup> were studied.  
46  
47 406 The Austrian CORSA Study has published results on genomic data<sup>75-77</sup>, telomere length<sup>78</sup>,  
48  
49 407 DNA repair processes<sup>79</sup>, tumor autoantibodies<sup>80</sup> as well as metabolomics.<sup>33 81</sup> To date,  
50  
51 408 publications from the EnCoRe Study have reported on associations of physical activity and  
52  
53 409 sedentary behaviour<sup>82-85</sup>, adherence to lifestyle guidelines<sup>86</sup>, and parameters of body  
54  
55 410 composition<sup>87 88</sup> measured through CT scans with quality of life, functioning and fatigue in  
56  
57 411 CRC survivors. Recently, longitudinal associations between supplement use and fatigue were  
58  
59 412 investigated from diagnosis to 2 years post-CRC treatment. No overall association between  
60  
413 supplement use and fatigue was found but results suggest that increased levels of fatigue may  
414  
415 be a reason for the use of supplements among CRC survivors.<sup>89</sup> Higher concentrations of  
416  
25OHD<sub>3</sub> were longitudinally associated with better global quality of life and less fatigue in  
colorectal cancer survivors within EnCoRe suggesting a potential beneficial role of vitamin D

1  
2  
3 417 in colorectal cancer survivors.<sup>35</sup> In a mixed-method study using data of the EnCoRe study,  
4 418 colorectal cancer (treatment) related health and functioning problems negatively impacted the  
5 419 ability of nearly 1 in 5 long-term CRC survivors to participate in everyday life situations and  
6 420 their satisfaction with participation.<sup>90</sup> The validity of the food frequency questionnaire for  
7 421 measuring dietary intake among survivors of colorectal cancer within the EnCoRe study  
8 422 appeared to be moderate to good for most nutrients and food groups, relative to a 7-day  
9 423 dietary record.<sup>91</sup> Prediction models that we developed for estimating 1-year risk of low health-  
10 424 related quality of life in seven domains in colorectal cancer survivors performed well when  
11 425 externally validated among survivors within the EnCoRe and COLON studies.<sup>92</sup>

### 426 **Future plans**

427 The consortium specified a comprehensive manuscript list of future projects using data from  
428 the FOCUS Consortium. Some selected projects are described below:

429 a) Recently, the investigation of longitudinal associations of adherence to the dietary World  
430 Cancer Research Fund/American Institute for Cancer Research (WCRF/AICR) and Dutch  
431 Healthy Diet (DHD) recommendations with plasma kynurenine levels in colorectal cancer  
432 survivors after treatment has been finalized and the corresponding manuscript is under review  
433 at an international journal.

434 b) Further, near-term future plans include the investigation of (1) biomarkers related to  
435 FOCM and associations with folate intake (from diet and supplements); (2) associations  
436 between FOCM biomarkers such as vitamin B12 and tryptophan and recurrence, survival, and  
437 patient-reported outcomes in CRC; (3) the impact of folate status (FOCM biomarkers and  
438 diet/supplements) on treatment toxicity in patients treated with 5-FU modifiers; (4) the  
439 interaction between biomarkers related to FOCM and polymorphisms in FOCM-related genes  
440 in relation to CRC prognosis (recurrence & survival); (5) prognosis (disease-free and overall  
441 survival) in stage I-III CRC and associations with dietary and supplement use at diagnosis and  
442 changes during and after treatment; (6) FOCM-related biomarkers and their association with  
443 body composition in stage I to III CRC patients; (7) associations between folate status  
444 (FOCM biomarkers and diet/supplement use) and recurrence, survival and patient-reported  
445 outcomes in young-onset CRC.

446 c) Long-term plans include the combination of additional biomarkers measured by the  
447 individual cohorts within the next years (e.g. microbiome data, omics- and multi-omics data  
448 etc.).

### 449 **Strengths and limitations**

450 This is the largest consortium to date addressing the research question of folate and FOCM  
451 biomarkers in relation to survival, recurrence, treatment toxicity, and health-related quality of  
452 life outcomes in CRC patients. The cohorts included in the FOCUS Consortium are designed  
453 to enable future pooling of data.<sup>22</sup> For that reason, methodologies, time points and  
454 measurement instruments generally overlap, with each study presenting unique features such  
455 as additional blood collection at the 6-week follow-up time point within the EnCoRe Study  
456 and blood draws during chemotherapy within the COLON Study. The pooled sample size  
457 provides sufficient power to investigate subgroup analyses across CRC patients, e.g., within  
458 groups of patients who underwent 5-fluorouracil based chemotherapy or stratified by disease  
459 stage. Furthermore, the assessment of biomarkers related to FOCM are conducted at a single,  
460 state-of-the art laboratory and the biological materials are processed and stored according to  
461 standardized operation protocols across all study sites, enabling precise and accurate  
462 measurements of FOCM biomarkers. While RCTs are the gold standard for establishing  
463 causality, the FOCUS cohort with its longitudinal design can contribute to establish causal  
464 relationships, with appropriate statistical analyses. Further, the FOCUS data includes a time-  
465 varying exposure on dietary supplement intake for future studies to consider. The collection  
466 of the longitudinal data on dietary supplement intake, a key-exposure, is essential to obtain  
467 meaningful estimates and thus required for developing recommendations and guidelines  
468 regarding dietary intakes among CRC patients. The study population is predominantly based  
469 on European cohorts (90.4%) in countries that have not implemented mandatory folic acid  
470 fortification. This enables us to study a population where dietary intake and dietary  
471 supplement use determine differences in folate status, yielding information of direct relevance  
472 to cancer patients. However, the generalizability of results to populations that have introduced  
473 folic acid fortification, including the United States, might therefore also be limited.<sup>93</sup>  
474 Performing sensitivity analyses by excluding countries without folic acid fortification (e.g.  
475 Germany) or investigating analyses separately for Germany and the US might help to address  
476 differences in fortification status. Moreover, patients were predominantly White, thus, it is not  
477 possible to address racial and ethnic minorities. Ethnicity/race is an important determinant of  
478 folate status and metabolism may be different between African Americans and Hispanics<sup>94</sup>,  
479 thus, recommendations should be limited to this current population. Future studies are  
480 warranted in diverse populations and compared with the FOCUS cohort.

481 Another limitation of the consortium includes differences in collection strategies of the  
482 baseline study time point across included studies: CORSA, COLON and EnCoRe are

1  
2  
3 483 recruiting CRC patients at diagnosis, preferably prior to any cancer treatment while ColoCare  
4  
5 484 is recruiting patients prior to surgery (i.e. neoadjuvant treatment might have occurred prior to  
6  
7 485 baseline blood and data collection). Nevertheless, the ColoCare protocol requires that no  
8  
9 486 blood draw occurs within 2 weeks of neoadjuvant or adjuvant chemotherapy, limiting the  
10  
11 487 influence of ongoing treatments on blood biomarkers. In some cohorts, the timing with  
12  
13 488 respect to adjuvant chemotherapy is less clearly defined and this will be carefully considered  
14  
15 489 in sensitivity analyses. Furthermore, survivor bias – a type of selection bias – may be  
16  
17 490 introduced as some patients died or did not complete follow-up questionnaires or did not  
18  
19 491 provide blood samples. It is possible that patients who experience more severe toxicities,  
20  
21 492 worse clinical outcomes, or worse health-related quality of life, are underrepresented among  
22  
23 493 those patients who completed follow-up measurements.<sup>4</sup> Cohort studies such as the one  
24  
25 494 presented here generate critical knowledge about preventable causes of disease. However,  
26  
27 495 selection bias may affect estimates. This is particularly true for non-participation at follow-up  
28  
29 496 that may depend on both the exposure and outcome. Within a review, Nohr et al. showed a  
30  
31 497 range of methods to quantify and adjust for selection bias. Even with limited data on  
32  
33 498 nonparticipants and those lost to follow up, it is possible to examine how effect estimates in a  
34  
35 499 specific study may be biased by selection.<sup>95</sup> The likelihood for reverse causation is small in  
36  
37 500 this prospective cohort, as the exposure measurements (blood folate levels and intake through  
38  
39 501 diet/supplements) were collected before the outcome (survival, recurrence, and quality of life)  
40  
41 502 occurred. Therefore, these outcomes are unlikely to have influenced the exposure  
42  
43 503 measurements. Given the robust follow-up in these cohorts for outcomes and data availability,  
44  
45 504 future studies will be able to consider key confounders as well as predictors of recurrence and  
46  
47 505 survival.

### 506 **Collaboration**

507 A substantial amount of time has been spent in creating the harmonized dataset of baseline  
508 variables from cohorts within the FOCUS Consortium, with follow-up data collection and  
509 FOCM biomarker analyses. Any person interested in collaborating, learning about the  
510 FOCUS Consortium or in getting access to FOCUS data and in-depth analyses can contact the  
511 coordinating study PIs Prof. Andrea Gsur ([andrea.gsur@meduniwien.ac.at](mailto:andrea.gsur@meduniwien.ac.at)) and Prof. Cornelia  
512 Ulrich ([neli.ulrich@hci.utah.edu](mailto:neli.ulrich@hci.utah.edu)). Requests for data will be discussed and decided by all PIs  
513 and will require a Data Transfer Agreement.

## 514 **Acknowledgements**

515 ColoCare Heidelberg: We thank all ColoCare study participants, the liquid biobank of the  
516 National Center for Tumor Diseases for storage of the blood samples according to the SOPs  
517 of the Biomaterialbank Heidelberg (BMBH), Michaela Magenreuter, Maria Thomalla-Starzl,  
518 Mareen, Dupovac, Marzena Knysok-Sypniewski, Lin Zielske, Anett Brendel, Renate  
519 Skatula, and Marita Wenzel for laboratory work, Rifraz Farook, Dr. Werner Diehl and Inna  
520 Müller for data management and clinical follow-up data collection, Dr. Clare Abbenhardt-  
521 Martin, Susanne Jakob, Judith Kammer for patient recruitment and follow-up, and Dr. Petra  
522 Schrotz-King and Dr. Jürgen Boehm for study coordination.

523 ColoCare Huntsman Cancer Institute: We thank all ColoCare study participants, the  
524 biorepository at Huntsman Cancer Institute for storage of the blood samples according to  
525 standardized SOPs, and Christy Warby for laboratory work. We thank Tyler Farr, Sarah  
526 Fischbuch and Debra Ma for data management and clinical follow-up data collection. We are  
527 very grateful for patient recruitment and follow-up by Elisa Santori, Hanna Omar-Payne and  
528 Marissa Grande, and Dr. Jürgen Boehm for study coordination.

529 ColoCare Fred Hutchinson Cancer Research Center: We thank all ColoCare study  
530 participants, the biorepository at Fred Hutchinson Cancer Research Center for storage of the  
531 blood samples according to standardized SOPs and the laboratory team for sample processing.  
532 We thank the ColoCare team for patient recruitment and follow-up and data management.

533 EnCoRe: We would like to thank all participants of the EnCoRe study and the health  
534 professionals in the three hospitals involved in the recruitment of participants of the study:  
535 Maastricht University Medical Center+, VieCuri Medical Center, and Zuyderland Medical  
536 Center. We would also like to thank the MEMIC center for data and information management  
537 for facilitating the logistic processes and data management of our study. Finally, we would  
538 like to thank the research dieticians and research assistant who are responsible for patient  
539 inclusion and follow-up, performing home visits, as well as data collection and processing.

540 CORSA: We kindly thank all individuals who agreed to participate in the CORSA study.  
541 Furthermore, we thank Thomas Bachleitner-Hofmann, Michael M. Bergmann, Judith Karner-  
542 Hanusch and Anton Stift (Department of Surgery, Medical University of Vienna), Karl Mach,  
543 Azita Deutinger-Permoon (KRAGES, Austria), and their co-workers for supporting CORSA  
544 recruitment. In addition, we would like to acknowledge Elisabeth Feik, Philipp Hofer and  
545 Cornelia Zöchmeister, for patient recruitment, sample processing, and follow-up.



1  
2  
3 546 COLON: The authors would like to thank the COLON participants, COLON investigators at  
4 547 Wageningen University & Research and the involved co-workers in the participating  
5 548 hospitals.

### 9 549 **Contributors**

10  
11 550 BG, MW, EK, PMU, CMU, AG, ABU, NH: conceived of the project, developed the overall  
12 551 research plan, and provided study oversight; BG, EHvR, ANH, SB, AJMRG, AU, JO, JLK,  
13 552 VD, RK, TG, TL, GK, TK, DEK, FJBvD, MJLB, AB, CIL, WMG, KV: conducted hands-on  
14 553 experiments and data collection; BG, EHvR, ANH, SB, AJMRG, AU, JO, JLK, VD, RK, TG,  
15 554 TL, GK, TK, DEK, FJBvD, CIL, WMG, KV, CMU: provided essential reagents or essential  
16 555 materials, databases, and so forth, necessary for the research; BG, EHvR, MJLB, AB, ANH,  
17 556 VD, SB: analyzed the data or performed the statistical analysis and made a major contribution  
18 557 to writing the paper; BG, MS, EK, PMU, ABU, MW, AG, CMU: had primary responsibility  
19 558 for the final content; all authors: reviewed the manuscript critically, provided feedback, and  
20 559 read and approved the final manuscript.

### 29 560 **Funding**

31  
32 561 The FOCUS Consortium is an ERA-NET (European Research Area Network) on Translational  
33 562 Cancer Research (TRANSCAN) project funded by the local research funding agencies  
34 563 (German Ministry of Education and Research, Germany, 01KT1503; Dutch Cancer Society  
35 564 with grant number UW2014-6877, the Netherlands; FWF Austrian Science Fund, Austria  
36 565 (API02104FW); Research Council Norway/Norwegian Cancer Society (RNC), Norway). The  
37 566 COLON study is further sponsored by Wereld Kanker Onderzoek Fonds, including funds  
38 567 from grant 2014/1179 as part of the World Cancer Research Fund International Regular Grant  
39 568 Programme; Alpe d'Huzes/Dutch Cancer Society (UM 2012-5653, UW 2013-5927, UW  
40 569 2015-7946); and ERA-NET on Translational Cancer Research (TRANSCAN/Dutch Cancer  
41 570 Society: UW2013-6397 and the Netherlands Organization for Health Research and  
42 571 Development (ZonMw), the Netherlands). The EnCoRe study was supported by grants from  
43 572 the Stichting Alpe d'HuZes within the research program 'Leven met kanker' of the Dutch  
44 573 Cancer Society (Grant No. UM-2010-4867 and UM-2012-5653), and by grants from  
45 574 Kankeronderzoekfonds Limburg as part of Health Foundation Limburg (Grant No.  
46 575 00005739), and by a grant from Wereld Kanker Onderzoek Fonds (WKOF), as part of the  
47 576 World Cancer Research Fund International grant programme (grant number 2016/1620).

1  
2  
3 577 Biljana Gigic was funded by the ERA-NET on Translational Cancer Research (TRANSCAN),  
4  
5 578 the German Ministry of Education and Research project 01KT1503, the National Institutes of  
6  
7 579 Health/National Cancer Institute (NHI/NCI) projects R01 CA189184 and U01 CA206110, the  
8  
9 580 Stiftung LebensBlicke, and the Matthias-Lackas Foundations. Eline H. van Roekel was  
10  
11 581 funded by the Wereld Kanker Onderzoek Fonds (WKOF), part of the World Cancer Research  
12  
13 582 Fund International grant programme (grant number 2016/1620). Martijn Bours was funded by  
14  
15 583 Alpe d'HuZes within the research program 'Leven met kanker' of the Dutch Cancer Society  
16  
17 584 (Grant No. UM-2012-5653). Dieuwertje E. Kok is supported by a Veni grant of the  
18  
19 585 Netherlands Organisation for Scientific Research (grant no. 016.Veni.188.082). Andreana N.  
20  
21 586 Holowatyj was supported by the National Institutes of Health under Ruth L. Kirschstein  
22  
23 587 National Research Service Award T32 HG008962 from the National Human Genome  
24  
25 588 Research Institute. Nina Habermann was funded by the TRANSCAN project 01KT1512,  
26  
27 589 Cornelia M. Ulrich and Jennifer Ose were funded by the Huntsman Cancer Foundation, and  
28  
29 590 NIH/NCI projects R01 CA189184, R01 CA207371, U01 CA206110, U01 CA206110 and P30  
30  
31 591 CA042014. NIH grants (P30 CA15704, U01 CA152756, R01 CA194663, R01 CA220004,  
32  
33 592 P01 CA077852), Rodger C. Haggitt Endowed Chair, R.A.C.E. Charities, Cottrell Family  
34  
35 593 Fund, Listwin Family Foundation, Seattle Translational Tumor Research program, Fred  
36  
37 594 Hutchinson Cancer Research Center (William M. Grady). Stefanie Brezina was funded by the  
38  
39 595 ERA-NET on Translational Cancer Research (TRANSCAN) project FOCUS I2104-B26 and  
40  
41 596 the ERA-NET on Translational Cancer Research (TRANSCAN) project MetaboCCC I 1578 –  
42  
43 597 B19. J.L. Koole was supported by Kankeronderzoekfonds Limburg as part of Health  
44  
45 598 Foundation Limburg (Grant No. 00005739). Victoria Damerell was funded by the German  
46  
47 599 Ministry of Education and Research project (01KD2101D).

#### 600 Disclaimer

601 The funder had no role in the design of the FOCUS consortium, or conduct of the study,  
602 collection, management, analysis, and interpretation of the data, preparation, review, or  
603 approval of the manuscript, or decision to submit the manuscript for publication.

#### 604 **Competing interests**

605 None declared.

#### 606 **Patient consent for publication**

607 Not applicable.

608

1  
2  
3 609 **Ethics approval**  
4

5 610 The Heidelberg ColoCare Study was approved by the Ethics Committee of the Medical  
6 611 Faculty of Heidelberg (approval no. S-310/2001 and S-134/2016). The ColoCare Study at the  
7 612 Huntsman Cancer Institute and the Fred Hutchinson Cancer Research Center were approved  
8  
9 613 by the respective IRBs (#77147 and #6407). For the CORSA study all subjects gave written  
10 614 informed consent and the study was approved by the institutional review boards:  
11  
12 615 ‘Ethikkommission Burgenland’ (33/2010), by the ethical review committee of the Medical  
13  
14 616 University of Vienna (1160/2016) and by the “Ethikkommission der Stadt Wien” (EK 06-  
15  
16 617 150VK). The EnCoRe Study was approved by the Medical Ethics Committee of the  
17  
18 618 Maastricht University Hospital and Maastricht University (METC 11-3-075).  
19  
20

21  
22 619 **Data availability**  
23

24 620 Data described in the manuscript, code book, and analytic code have been generated from  
25 621 European-based consortia and as such are subject to regulations from multiple European  
26 622 countries, which limit our availability to share data. The consortium’s funding has ended, and  
27  
28 623 no centralized staff is available to support  
29  
30 624 data requests. However, the FOCUS PIs have agreed to answer any queries or discuss  
31  
32 625 potential projects with anyone interested in future collaborative research. For further  
33  
34 626 questions please contact colocarestudy\_admin@hci.utah.edu.  
35  
36  
37

38 627  
39  
40  
41  
42  
43  
44  
45  
46  
47  
48  
49  
50  
51  
52  
53  
54  
55  
56  
57  
58  
59  
60

## References

1. Ferlay J, Colombet M, Soerjomataram I, et al. Estimating the global cancer incidence and mortality in 2018: GLOBOCAN sources and methods. *International journal of cancer Journal international du cancer* 2019;144(8):1941-53. doi: 10.1002/ijc.31937 [published Online First: 2018/10/24]
2. De Angelis R, Sant M, Coleman MP, et al. Cancer survival in Europe 1999-2007 by country and age: results of EURO CARE--5-a population-based study. *The Lancet Oncology* 2014;15(1):23-34. doi: 10.1016/S1470-2045(13)70546-1
3. Ferlay J, Colombet M, Soerjomataram I, et al. Cancer incidence and mortality patterns in Europe: Estimates for 40 countries and 25 major cancers in 2018. *European journal of cancer* 2018;103:356-87. doi: 10.1016/j.ejca.2018.07.005 [published Online First: 2018/08/14]
4. Gigic B, Boeing H, Toth R, et al. Associations Between Dietary Patterns and Longitudinal Quality of Life Changes in Colorectal Cancer Patients: The ColoCare Study. *Nutrition and cancer* 2017;1-10. doi: 10.1080/01635581.2018.1397707 [published Online First: 2017/12/16]
5. Velicer CM, Ulrich CM. Vitamin and mineral supplement use among US adults after cancer diagnosis: a systematic review. *Journal of clinical oncology : official journal of the American Society of Clinical Oncology* 2008;26(4):665-73. doi: 10.1200/JCO.2007.13.5905
6. Ulrich CM, Potter JD. Folate supplementation: too much of a good thing? *Cancer Epidemiol Biomarkers Prev* 2006;15(2):189-93. doi: 10.1158/1055-9965.EPI-152CO [published Online First: 2006/02/24]
7. Jatoi A, Williams B, Nichols F, et al. Is voluntary vitamin and mineral supplementation associated with better outcome in non-small cell lung cancer patients? Results from the Mayo Clinic lung cancer cohort. *Lung Cancer* 2005;49(1):77-84. doi: 10.1016/j.lungcan.2005.01.004 [published Online First: 2005/06/14]
8. Ferrucci LM, McCorkle R, Smith T, et al. Factors related to the use of dietary supplements by cancer survivors. *J Altern Complement Med* 2009;15(6):673-80. doi: 10.1089/acm.2008.0387
9. Caudill MA. Folate bioavailability: implications for establishing dietary recommendations and optimizing status. *The American journal of clinical nutrition* 2010;91(5):1455S-60S. doi: 10.3945/ajcn.2010.28674E [published Online First: 2010/03/12]
10. Ducker GS, Rabinowitz JD. One-Carbon Metabolism in Health and Disease. *Cell Metab* 2017;25(1):27-42. doi: 10.1016/j.cmet.2016.08.009 [published Online First: 2016/09/20]
11. Miller JW, Ulrich CM. Folic acid and cancer--where are we today? *Lancet* 2013;381(9871):974-6. doi: 10.1016/S0140-6736(13)60110-5 [published Online First: 2013/01/29]
12. Kim YI. Folate and colorectal cancer: an evidence-based critical review. *Mol Nutr Food Res* 2007;51(3):267-92. doi: 10.1002/mnfr.200600191 [published Online First: 2007/02/14]
13. Ulrich CM, Toriola AT, Siegel EM, et al. Plasma 25-hydroxyvitamin D3, folate and vitamin B12 biomarkers among international colorectal cancer patients: a pilot study. *J Nutr Sci* 2013;2:e9. doi: 10.1017/jns.2012.28
14. Cole BF, Baron JA, Sandler RS, et al. Folic acid for the prevention of colorectal adenomas: a randomized clinical trial. *Jama* 2007;297(21):2351-9. doi: 10.1001/jama.297.21.2351 [published Online First: 2007/06/07]
15. Lawrance AK, Deng L, Rozen R. Methylene tetrahydrofolate reductase deficiency and low dietary folate reduce tumorigenesis in Apc min/+ mice. *Gut* 2009;58(6):805-11. doi: 10.1136/gut.2007.143107 [published Online First: 2009/01/29]
16. Lindzon GM, Medline A, Sohn KJ, et al. Effect of folic acid supplementation on the progression of colorectal aberrant crypt foci. *Carcinogenesis* 2009;30(9):1536-43. doi: 10.1093/carcin/bgp152 [published Online First: 2009/06/23]
17. Mason JB. Folate, cancer risk, and the Greek god, Proteus: a tale of two chameleons. *Nutrition reviews* 2009;67(4):206-12. doi: 10.1111/j.1753-4887.2009.00190.x [published Online First: 2009/04/02]
18. Ulrich CM, Miller JW. Folate and health: present and future. *Mol Nutr Food Res* 2013;57(4):561. doi: 10.1002/mnfr.201370034 [published Online First: 2013/04/05]
19. Choi JH, Yates Z, Martin C, et al. Gene-Nutrient Interaction between Folate and Dihydrofolate Reductase in Risk for Adenomatous Polyp Occurrence: A Preliminary Report. *J Nutr Sci*

- 1  
2  
3 683 *Vitaminol (Tokyo)* 2015;61(6):455-9. doi: 10.3177/jnsv.61.455 [published Online First:  
4 684 2016/02/16]
- 5 685 20. Sawaengsri H, Wang J, Reginaldo C, et al. High folic acid intake reduces natural killer cell  
6 686 cytotoxicity in aged mice. *J Nutr Biochem* 2016;30:102-7. doi: 10.1016/j.jnutbio.2015.12.006  
7 687 [published Online First: 2016/03/26]
- 8 688 21. Ulrich CM, Gigic B, Bohm J, et al. The ColoCare Study: A Paradigm of Transdisciplinary Science  
9 689 in Colorectal Cancer Outcomes. *Cancer Epidemiol Biomarkers Prev* 2019;28(3):591-601. doi:  
10 690 10.1158/1055-9965.EPI-18-0773 [published Online First: 2018/12/14]
- 11 691 22. Winkels RM, Heine-Broring RC, van Zutphen M, et al. The COLON study: Colorectal cancer:  
12 692 Longitudinal, Observational study on Nutritional and lifestyle factors that may influence  
13 693 colorectal tumour recurrence, survival and quality of life. *BMC cancer* 2014;14:374. doi:  
14 694 10.1186/1471-2407-14-374 [published Online First: 2014/06/03]
- 15 695 23. van Roekel EH, Bours MJ, de Brouwer CP, et al. The applicability of the international  
16 696 classification of functioning, disability, and health to study lifestyle and quality of life of  
17 697 colorectal cancer survivors. *Cancer Epidemiol Biomarkers Prev* 2014;23(7):1394-405. doi:  
18 698 10.1158/1055-9965.EPI-13-1144 [published Online First: 2014/05/08]
- 19 699 24. Fayers P, Bottomley A, Group EQoL, et al. Quality of life research within the EORTC-the  
20 700 EORTC QLQ-C30. European Organisation for Research and Treatment of Cancer. *European*  
21 701 *journal of cancer* 2002;38 Suppl 4:S125-33.
- 22 702 25. Postma TJ, Aaronson NK, Heimans JJ, et al. The development of an EORTC quality of life  
23 703 questionnaire to assess chemotherapy-induced peripheral neuropathy: the QLQ-CIPN20.  
24 704 *European journal of cancer* 2005;41(8):1135-9. doi: 10.1016/j.ejca.2005.02.012
- 25 705 26. Molloy AM, Scott JM. Microbiological assay for serum, plasma, and red cell folate using  
26 706 cryopreserved, microtiter plate method. *Methods Enzymol* 1997;281:43-53. [published Online  
27 707 First: 1997/01/01]
- 28 708 27. Kelleher BP, Broin SD. Microbiological assay for vitamin B12 performed in 96-well microtitre  
29 709 plates. *J Clin Pathol* 1991;44(7):592-5. [published Online First: 1991/07/01]
- 30 710 28. Hannisdal R, Ueland PM, Svardal A. Liquid chromatography-tandem mass spectrometry analysis  
31 711 of folate and folate catabolites in human serum. *Clin Chem* 2009;55(6):1147-54. doi:  
32 712 10.1373/clinchem.2008.114389 [published Online First: 2009/04/11]
- 33 713 29. Midttun O, Hustad S, Ueland PM. Quantitative profiling of biomarkers related to B-vitamin status,  
34 714 tryptophan metabolism and inflammation in human plasma by liquid chromatography/tandem  
35 715 mass spectrometry. *Rapid Commun Mass Spectrom* 2009;23(9):1371-9. doi:  
36 716 10.1002/rcm.4013 [published Online First: 2009/04/02]
- 37 717 30. Midttun O, Kvalheim G, Ueland PM. High-throughput, low-volume, multianalyte quantification of  
38 718 plasma metabolites related to one-carbon metabolism using HPLC-MS/MS. *Anal Bioanal*  
39 719 *Chem* 2013;405(6):2009-17. doi: 10.1007/s00216-012-6602-6 [published Online First:  
40 720 2012/12/13]
- 41 721 31. Midttun O, McCann A, Aarseth O, et al. Combined Measurement of 6 Fat-Soluble Vitamins and  
42 722 26 Water-Soluble Functional Vitamin Markers and Amino Acids in 50 µL of Serum or  
43 723 Plasma by High-Throughput Mass Spectrometry. *Anal Chem* 2016;88(21):10427-36. doi:  
44 724 10.1021/acs.analchem.6b02325 [published Online First: 2016/11/02]
- 45 725 32. Meyer K, Ueland PM. Targeted quantification of C-reactive protein and cystatin c and its variants  
46 726 by immuno-MALDI-MS. *Anal Chem* 2014;86(12):5807-14. doi: 10.1021/ac500704y  
47 727 [published Online First: 2014/05/23]
- 48 728 33. Geijsen A, Ulvik A, Gigic B, et al. Circulating Folate and Folic Acid Concentrations: Associations  
49 729 With Colorectal Cancer Recurrence and Survival. *JNCI Cancer Spectr* 2020;4(5):pkaa051.  
50 730 doi: 10.1093/jncics/pkaa051 [published Online First: 2020/11/03]
- 51 731 34. Kiblawi R, Holowatyj AN, Gigic B, et al. One-carbon metabolites, B-vitamins and associations  
52 732 with systemic inflammation and angiogenesis biomarkers among colorectal cancer patients:  
53 733 results from the ColoCare Study. *The British journal of nutrition* 2020:1-32. doi:  
54 734 10.1017/S0007114520000422 [published Online First: 2020/02/06]
- 55 735 35. Koole JL, Bours MJL, Geijsen A, et al. Circulating B-vitamin biomarkers and B-vitamin  
56 736 supplement use in relation to quality of life in patients with colorectal cancer: results from the  
57 737 FOCUS consortium. *The American journal of clinical nutrition* 2021 doi:  
58 738 10.1093/ajcn/nqaa422 [published Online First: 2021/03/06]

- 1  
2  
3 739 36. Schrotz-King P, Dölp K, Paskow MJ, et al. Dietary Supplement Use among German Colorectal  
4 740 Cancer Patients: the ColoCare Study: AACR/MEG Post-GWAS Horizons in Molecular  
5 741 Epidemiology: Digging Deeper into the Environment., 2012.  
6 742 37. Lao VV, Welsh P, Luo Y, et al. Altered RECQ Helicase Expression in Sporadic Primary  
7 743 Colorectal Cancers. *Transl Oncol* 2013;6(4):458-69.  
8 744 38. Luo Y, Kaz AM, Kanngurn S, et al. NTRK3 is a potential tumor suppressor gene commonly  
9 745 inactivated by epigenetic mechanisms in colorectal cancer. *PLoS Genet* 2013;9(7):e1003552.  
10 746 doi: 10.1371/journal.pgen.1003552  
11 747 39. Luo Y, Tsuchiya KD, Il Park D, et al. RET is a potential tumor suppressor gene in colorectal  
12 748 cancer. *Oncogene* 2013;32(16):2037-47. doi: 10.1038/onc.2012.225  
13 749 40. Sherwood AM, Emerson RO, Scherer D, et al. Tumor-infiltrating lymphocytes in colorectal  
14 750 tumors display a diversity of T cell receptor sequences that differ from the T cells in adjacent  
15 751 mucosal tissue. *Cancer Immunol Immunother* 2013;62(9):1453-61. doi: 10.1007/s00262-013-  
16 752 1446-2  
17 753 41. Skender S, Bohm J, Schrotz-King P, et al. Plasma 25-Hydroxyvitamin D3 Levels in Colorectal  
18 754 Cancer Patients and Associations with Physical Activity. *Nutrition and cancer*  
19 755 2017;69(2):229-37. doi: 10.1080/01635581.2017.1265131  
20 756 42. Luo Y, Wong CJ, Kaz AM, et al. Differences in DNA methylation signatures reveal multiple  
21 757 pathways of progression from adenoma to colorectal cancer. *Gastroenterology*  
22 758 2014;147(2):418-29 e8. doi: 10.1053/j.gastro.2014.04.039  
23 759 43. Barrow TM, Klett H, Toth R, et al. Smoking is associated with hypermethylation of the APC 1A  
24 760 promoter in colorectal cancer: the ColoCare Study. *J Pathol* 2017;243(3):366-75. doi:  
25 761 10.1002/path.4955 [published Online First: 2017/08/10]  
26 762 44. Yu M, Carter KT, Makar KW, et al. MethyLight droplet digital PCR for detection and absolute  
27 763 quantification of infrequently methylated alleles. *Epigenetics* 2015;10(9):803-9. doi:  
28 764 10.1080/15592294.2015.1068490  
29 765 45. Klett H, Balavarca Y, Toth R, et al. Robust prediction of gene regulation in colorectal cancer  
30 766 tissues from DNA methylation profiles. *Epigenetics* 2018;13(4):386-97. doi:  
31 767 10.1080/15592294.2018.1460034 [published Online First: 2018/04/27]  
32 768 46. Ristau J, Staffa J, Schrotz-King P, et al. Suitability of circulating miRNAs as potential prognostic  
33 769 markers in colorectal cancer. *Cancer Epidemiol Biomarkers Prev* 2014;23(12):2632-7. doi:  
34 770 10.1158/1055-9965.EPI-14-0556  
35 771 47. Yuan Z, Baker K, Redman MW, et al. Dynamic plasma microRNAs are biomarkers for prognosis  
36 772 and early detection of recurrence in colorectal cancer. *British journal of cancer*  
37 773 2017;117(8):1202-10. doi: 10.1038/bjc.2017.266 [published Online First: 2017/08/16]  
38 774 48. Zeller G, Tap J, Voigt AY, et al. Potential of fecal microbiota for early-stage detection of  
39 775 colorectal cancer. *Mol Syst Biol* 2014;10:766. doi: 10.15252/msb.20145645  
40 776 49. Thomas AM, Manghi P, Asnicar F, et al. Metagenomic analysis of colorectal cancer datasets  
41 777 identifies cross-cohort microbial diagnostic signatures and a link with choline degradation.  
42 778 *Nat Med* 2019;25(4):667-78. doi: 10.1038/s41591-019-0405-7 [published Online First:  
43 779 2019/04/03]  
44 780 50. Wirbel J, Pyl PT, Kartal E, et al. Meta-analysis of fecal metagenomes reveals global microbial  
45 781 signatures that are specific for colorectal cancer. *Nat Med* 2019;25(4):679-89. doi:  
46 782 10.1038/s41591-019-0406-6 [published Online First: 2019/04/03]  
47 783 51. Liesenfeld DB, Grapov D, Fahrman JF, et al. Metabolomics and transcriptomics identify pathway  
48 784 differences between visceral and subcutaneous adipose tissue in colorectal cancer patients: the  
49 785 ColoCare study. *The American journal of clinical nutrition* 2015;102(2):433-43. doi:  
50 786 10.3945/ajcn.114.103804  
51 787 52. Liesenfeld DB, Habermann N, Toth R, et al. Changes in urinary metabolic profiles of colorectal  
52 788 cancer patients enrolled in a prospective cohort study (ColoCare). *Metabolomics*  
53 789 2015;11(4):998-1012. doi: 10.1007/s11306-014-0758-3 [published Online First: 2015/08/01]  
54 790 53. Ose J, Gigic B, Lin T, et al. Multiplatform Urinary Metabolomics Profiling to Discriminate  
55 791 Cachectic from Non-Cachectic Colorectal Cancer Patients: Pilot Results from the ColoCare  
56 792 Study. *Metabolites* 2019;9(9) doi: 10.3390/metabo9090178 [published Online First:  
57 793 2019/09/11]

1  
2  
3  
4  
5  
6  
7  
8  
9  
10  
11  
12  
13  
14  
15  
16  
17  
18  
19  
20  
21  
22  
23  
24  
25  
26  
27  
28  
29  
30  
31  
32  
33  
34  
35  
36  
37  
38  
39  
40  
41  
42  
43  
44  
45  
46  
47  
48  
49  
50  
51  
52  
53  
54  
55  
56  
57  
58  
59  
60

- 794 54. Bohm J, Pianka F, Stuttgart N, et al. Discovery of novel plasma proteins as biomarkers for the  
795 development of incisional hernias after midline incision in patients with colorectal cancer: The  
796 ColoCare study. *Surgery* 2017;161(3):808-17. doi: 10.1016/j.surg.2016.08.025
- 797 55. Gong J, Hutter CM, Newcomb PA, et al. Genome-Wide Interaction Analyses between Genetic  
798 Variants and Alcohol Consumption and Smoking for Risk of Colorectal Cancer. *PLoS Genet*  
799 2016;12(10):e1006296. doi: 10.1371/journal.pgen.1006296 [published Online First:  
800 2016/10/11]
- 801 56. Delphan M, Lin T, Liesenfeld DB, et al. Associations of branched-chain amino acids with  
802 parameters of energy balance and survival in colorectal cancer patients: Results from the  
803 ColoCare Study. *Metabolomics* 2018;2018(14) doi: 10.1007/s11306-017-1314-8 [published  
804 Online First: 2018/05/01]
- 805 57. Rosenthal EA, Shirts BH, Amendola LM, et al. Rare loss of function variants in candidate genes  
806 and risk of colorectal cancer. *Hum Genet* 2018 doi: 10.1007/s00439-018-1938-4 [published  
807 Online First: 2018/09/30]
- 808 58. Nattenmueller J, Hoegenauer H, Boehm J, et al. CT-based compartmental quantification of adipose  
809 tissue versus body metrics in colorectal cancer patients. *Eur Radiol* 2016;26(11):4131-40. doi:  
810 10.1007/s00330-016-4231-8
- 811 59. Ozoya OO, Siegel EM, Srikumar T, et al. Quantitative Assessment of Visceral Obesity and  
812 Postoperative Colon Cancer Outcomes. *J Gastrointest Surg* 2017;21(3):534-42. doi:  
813 10.1007/s11605-017-3362-9 [published Online First: 2017/01/20]
- 814 60. van Zutphen M, Geelen A, Boshuizen HC, et al. Pre-to-post diagnosis weight trajectories in  
815 colorectal cancer patients with non-metastatic disease. *Supportive care in cancer : official*  
816 *journal of the Multinational Association of Supportive Care in Cancer* 2019;27(4):1541-49.  
817 doi: 10.1007/s00520-018-4560-z [published Online First: 2018/11/30]
- 818 61. van Zutphen M, Boshuizen HC, Kok DE, et al. Colorectal cancer survivors only marginally change  
819 their overall lifestyle in the first 2 years following diagnosis. *J Cancer Surviv* 2019;13(6):956-  
820 67. doi: 10.1007/s11764-019-00812-7 [published Online First: 2019/10/28]
- 821 62. Wesselink E, Bours MJL, de Wilt JHW, et al. Chemotherapy and vitamin D supplement use are  
822 determinants of serum 25-hydroxyvitamin D levels during the first six months after colorectal  
823 cancer diagnosis. *J Steroid Biochem Mol Biol* 2020;199:105577. doi:  
824 10.1016/j.jsbmb.2020.105577 [published Online First: 2020/01/10]
- 825 63. Wesselink E, Kok DE, de Wilt JHW, et al. Sufficient 25-Hydroxyvitamin D Levels 2 Years after  
826 Colorectal Cancer Diagnosis are Associated with a Lower Risk of All-cause Mortality. *Cancer*  
827 *Epidemiol Biomarkers Prev* 2021;30(4):765-73. doi: 10.1158/1055-9965.EPI-20-1388  
828 [published Online First: 2021/02/04]
- 829 64. Wesselink E, Balvers M, Bours MJL, et al. The association between circulating levels of vitamin  
830 D and inflammatory markers in the first 2 years after colorectal cancer diagnosis. *Therap Adv*  
831 *Gastroenterol* 2020;13:1756284820923922. doi: 10.1177/1756284820923922 [published  
832 Online First: 2020/06/18]
- 833 65. Wesselink E, Kok DE, Bours MJL, et al. Vitamin D, magnesium, calcium, and their interaction in  
834 relation to colorectal cancer recurrence and all-cause mortality. *The American journal of*  
835 *clinical nutrition* 2020;111(5):1007-17. doi: 10.1093/ajcn/nqaa049 [published Online First:  
836 2020/03/20]
- 837 66. van Zutphen M, Winkels RM, van Duijnhoven FJ, et al. An increase in physical activity after  
838 colorectal cancer surgery is associated with improved recovery of physical functioning: a  
839 prospective cohort study. *BMC cancer* 2017;17(1):74. doi: 10.1186/s12885-017-3066-2  
840 [published Online First: 2017/01/27]
- 841 67. Wesselink E, van Baar H, van Zutphen M, et al. Inflammation Is a Mediating Factor in the  
842 Association between Lifestyle and Fatigue in Colorectal Cancer Patients. *Cancers (Basel)*  
843 2020;12(12) doi: 10.3390/cancers12123701 [published Online First: 2020/12/16]
- 844 68. Wesselink E, Staritsky LE, van Zutphen M, et al. The association between the adapted dietary  
845 inflammatory index and colorectal cancer recurrence and all-cause mortality. *Clin Nutr*  
846 2021;40(6):4436-43. doi: 10.1016/j.clnu.2021.01.004 [published Online First: 2021/01/23]
- 847 69. van Baar H, Winkels RM, Brouwer JGM, et al. Associations of Abdominal Skeletal Muscle Mass,  
848 Fat Mass, and Mortality among Men and Women with Stage I-III Colorectal Cancer. *Cancer*

- 1  
2  
3 849 *Epidemiol Biomarkers Prev* 2020;29(5):956-65. doi: 10.1158/1055-9965.EPI-19-1134  
4 850 [published Online First: 2020/03/07]
- 5 851 70. van Baar H, Beijer S, Bours MJL, et al. Low radiographic muscle density is associated with lower  
6 852 overall and disease-free survival in early-stage colorectal cancer patients. *J Cancer Res Clin*  
7 853 *Oncol* 2018;144(11):2139-47. doi: 10.1007/s00432-018-2736-z [published Online First:  
8 854 2018/08/19]
- 9 855 71. van Baar H, Bours MJL, Beijer S, et al. Body composition and its association with fatigue in the  
10 856 first 2 years after colorectal cancer diagnosis. *J Cancer Surviv* 2021;15(4):597-606. doi:  
11 857 10.1007/s11764-020-00953-0 [published Online First: 2020/10/18]
- 12 858 72. Winkels RM, van Brakel L, van Baar H, et al. Are Ergothioneine Levels in Blood Associated with  
13 859 Chronic Peripheral Neuropathy in Colorectal Cancer Patients Who Underwent Chemotherapy?  
14 860 *Nutrition and cancer* 2020;72(3):451-59. doi: 10.1080/01635581.2019.1637005 [published  
15 861 Online First: 2019/07/13]
- 16 862 73. Wesselink E, Winkels RM, van Baar H, et al. Dietary Intake of Magnesium or Calcium and  
17 863 Chemotherapy-Induced Peripheral Neuropathy in Colorectal Cancer Patients. *Nutrients*  
18 864 2018;10(4) doi: 10.3390/nu10040398 [published Online First: 2018/03/24]
- 19 865 74. Postma EM, Kok DE, de Graaf C, et al. Chemosensory perception and food preferences in  
20 866 colorectal cancer patients undergoing adjuvant chemotherapy. *Clin Nutr ESPEN* 2020;40:242-  
21 867 51. doi: 10.1016/j.clnesp.2020.09.012 [published Online First: 2020/11/14]
- 22 868 75. Hofer P, Hagmann M, Brezina S, et al. Bayesian and frequentist analysis of an Austrian genome-  
23 869 wide association study of colorectal cancer and advanced adenomas. *Oncotarget*  
24 870 2017;8(58):98623-34. doi: 10.18632/oncotarget.21697 [published Online First: 2017/12/13]
- 25 871 76. Schmit SL, Edlund CK, Schumacher FR, et al. Novel Common Genetic Susceptibility Loci for  
26 872 Colorectal Cancer. *Journal of the National Cancer Institute* 2019;111(2):146-57. doi:  
27 873 10.1093/jnci/djy099 [published Online First: 2018/06/20]
- 28 874 77. Schafmayer C, Harrison JW, Buch S, et al. Genome-wide association analysis of diverticular  
29 875 disease points towards neuromuscular, connective tissue and epithelial pathomechanisms. *Gut*  
30 876 2019 doi: 10.1136/gutjnl-2018-317619 [published Online First: 2019/01/21]
- 31 877 78. Zochmeister C, Brezina S, Hofer P, et al. Leukocyte telomere length throughout the continuum of  
32 878 colorectal carcinogenesis. *Oncotarget* 2018;9(17):13582-92. doi: 10.18632/oncotarget.24431  
33 879 [published Online First: 2018/03/24]
- 34 880 79. Jiraskova K, Hughes DJ, Brezina S, et al. Functional Polymorphisms in DNA Repair Genes Are  
35 881 Associated with Sporadic Colorectal Cancer Susceptibility and Clinical Outcome. *Int J Mol*  
36 882 *Sci* 2018;20(1) doi: 10.3390/ijms20010097 [published Online First: 2018/12/29]
- 37 883 80. Luna Coronell JA, Sergelen K, Hofer P, et al. The Immunome of Colon Cancer: Functional In  
38 884 Silico Analysis of Antigenic Proteins Deduced from IgG Microarray Profiling. *Genomics*  
39 885 *Proteomics Bioinformatics* 2018;16(1):73-84. doi: 10.1016/j.gpb.2017.10.002 [published  
40 886 Online First: 2018/03/06]
- 41 887 81. Geijsen A, van Roekel EH, van Duijnhoven FJB, et al. Plasma metabolites associated with  
42 888 colorectal cancer stage: Findings from an international consortium. *International journal of*  
43 889 *cancer Journal international du cancer* 2019 doi: 10.1002/ijc.32666 [published Online First:  
44 890 2019/09/10]
- 45 891 82. Van Roekel EH, Bours MJ, Breedveld-Peters JJ, et al. Light Physical Activity Is Associated with  
46 892 Quality of Life after Colorectal Cancer. *Med Sci Sports Exerc* 2015;47(12):2493-503. doi:  
47 893 10.1249/MSS.0000000000000698 [published Online First: 2015/05/15]
- 48 894 83. van Roekel EH, Winkler EA, Bours MJ, et al. Associations of sedentary time and patterns of  
49 895 sedentary time accumulation with health-related quality of life in colorectal cancer survivors.  
50 896 *Prev Med Rep* 2016;4:262-9. doi: 10.1016/j.pmedr.2016.06.022 [published Online First:  
51 897 2016/07/16]
- 52 898 84. van Roekel EH, Bours MJ, Breedveld-Peters JJ, et al. Modeling how substitution of sedentary  
53 899 behavior with standing or physical activity is associated with health-related quality of life in  
54 900 colorectal cancer survivors. *Cancer causes & control : CCC* 2016;27(4):513-25. doi:  
55 901 10.1007/s10552-016-0725-6 [published Online First: 2016/02/20]
- 56 902 85. van Roekel EH, Duchateau J, Bours MJL, et al. Longitudinal associations of light-intensity  
57 903 physical activity with quality of life, functioning and fatigue after colorectal cancer. *Quality of*  
58 904 *life research : an international journal of quality of life aspects of treatment, care and*



- 1  
2  
3 905            *rehabilitation* 2020;29(11):2987-98. doi: 10.1007/s11136-020-02566-7 [published Online  
4 906            First: 2020/07/04]
- 5 907 86. Breedveld-Peters JJJ, Koole JL, Muller-Schulte E, et al. Colorectal cancers survivors' adherence to  
6 908            lifestyle recommendations and cross-sectional associations with health-related quality of life.  
7 909            *The British journal of nutrition* 2018;120(2):188-97. doi: 10.1017/S0007114518000661  
8 910            [published Online First: 2018/04/17]
- 9 911 87. van Roekel EH, Bours MJL, Te Molder MEM, et al. Associations of adipose and muscle tissue  
10 912            parameters at colorectal cancer diagnosis with long-term health-related quality of life. *Quality*  
11 913            *of life research : an international journal of quality of life aspects of treatment, care and*  
12 914            *rehabilitation* 2017;26(7):1745-59. doi: 10.1007/s11136-017-1539-z [published Online First:  
13 915            2017/03/21]
- 14 916 88. van Heinsbergen M, Konsten JL, Bours MJL, et al. Preoperative handgrip strength is not  
15 917            associated with complications and health-related quality of life after surgery for colorectal  
16 918            cancer. *Sci Rep* 2020;10(1):13005. doi: 10.1038/s41598-020-69806-1 [published Online First:  
17 919            2020/08/05]
- 18 920 89. Koole JL, Bours MJL, Breedveld-Peters JJJ, et al. Is dietary supplement use longitudinally  
19 921            associated with fatigue in stage I-III colorectal cancer survivors? *Clin Nutr* 2019 doi:  
20 922            10.1016/j.clnu.2018.12.037 [published Online First: 2019/02/17]
- 21 923 90. Breedveld-Peters JJJ, Bours MJL, Cords CI, et al. The impact of participation restrictions on  
22 924            everyday life in long-term colorectal cancer survivors in the EnCoRe study: A mixed-method  
23 925            study. *Eur J Oncol Nurs* 2020;45:101724. doi: 10.1016/j.ejon.2020.101724 [published Online  
24 926            First: 2020/02/12]
- 25 927 91. Koole JL, Bours MJL, Breedveld-Peters JJJ, et al. Evaluating the Validity of a Food Frequency  
26 928            Questionnaire in Comparison with a 7-Day Dietary Record for Measuring Dietary Intake in a  
27 929            Population of Survivors of Colorectal Cancer. *J Acad Nutr Diet* 2020;120(2):245-57. doi:  
28 930            10.1016/j.jand.2019.09.008 [published Online First: 2019/12/07]
- 29 931 92. Revesz D, van Kuijk SMJ, Mols F, et al. Development and internal validation of prediction models  
30 932            for colorectal cancer survivors to estimate the 1-year risk of low health-related quality of life  
31 933            in multiple domains. *BMC Med Inform Decis Mak* 2020;20(1):54. doi: 10.1186/s12911-020-  
32 934            1064-9 [published Online First: 2020/03/14]
- 33 935 93. Ose J, Botma A, Balavarca Y, et al. Pathway analysis of genetic variants in folate-mediated one-  
34 936            carbon metabolism-related genes and survival in a prospectively followed cohort of colorectal  
35 937            cancer patients. *Cancer Med* 2018 doi: 10.1002/cam4.1407 [published Online First:  
36 938            2018/05/31]
- 37 939 94. Perry CA, Renna SA, Khitun E, et al. Ethnicity and race influence the folate status response to  
38 940            controlled folate intakes in young women. *The Journal of nutrition* 2004;134(7):1786-92. doi:  
39 941            10.1093/jn/134.7.1786 [published Online First: 2004/07/01]
- 40 942 95. Nohr EA, Liew Z. How to investigate and adjust for selection bias in cohort studies. *Acta Obstet*  
41 943            *Gynecol Scand* 2018;97(4):407-16. doi: 10.1111/aogs.13319 [published Online First:  
42 944            2018/02/08]

945

1  
2  
3 946 **Figure legends**  
4

5 947 **Figure 1** FOCUS Consortium design  
6  
7  
8  
9  
10  
11  
12  
13  
14  
15  
16  
17  
18  
19  
20  
21  
22  
23  
24  
25  
26  
27  
28  
29  
30  
31  
32  
33  
34  
35  
36  
37  
38  
39  
40  
41  
42  
43  
44  
45  
46  
47  
48  
49  
50  
51  
52  
53  
54  
55  
56  
57  
58  
59  
60

For peer review only

1  
2  
3  
4  
5  
6  
7  
8  
9  
10  
11  
12  
13  
14  
15  
16  
17  
18  
19  
20  
21  
22  
23  
24  
25  
26  
27  
28  
29  
30  
31  
32  
33  
34  
35  
36  
37  
38  
39  
40  
41  
42  
43  
44  
45  
46  
47  
48  
49  
50  
51  
52  
53  
54  
55  
56



Supplement: bmjopen-2022-062930.draft_revisions.pdf [file bmjopen-2022-062930.draft_revisions.pdf]
